# Supplementary material
Source: Springer Nature journal article supplement (https://www.springermedizin.de/resource/supplementary/12872_2006_118_MOESM3_ESM.pdf/9431054)

# Hourly Poincaré Plots for NSR subjects

This file contains the hourly Poincaré plots of all the NSR patients the data on whom was used in the study by Thakre and Smith. All the plots are plotted on a square representing 0.5 to 1.5 seconds on both axes. The x-axis represents the current beat while the y-axis represents the next beat. The identifier for the study subject is shown in the box representing the hour 24 at the bottom of each page.

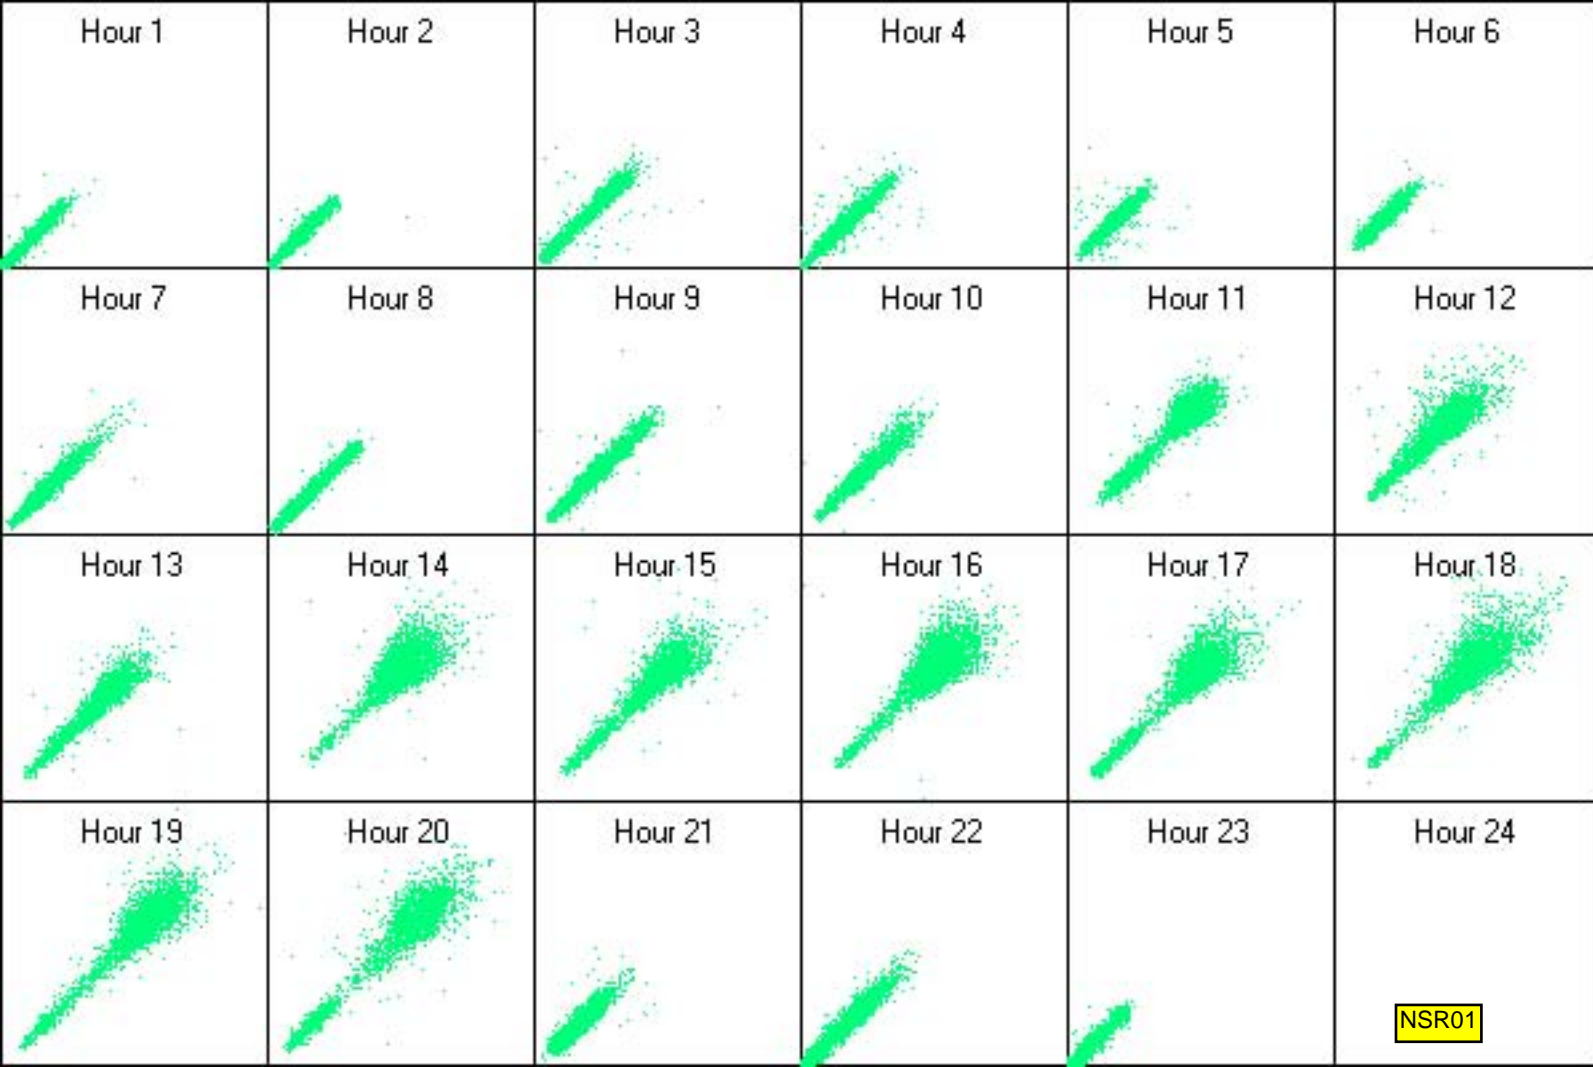

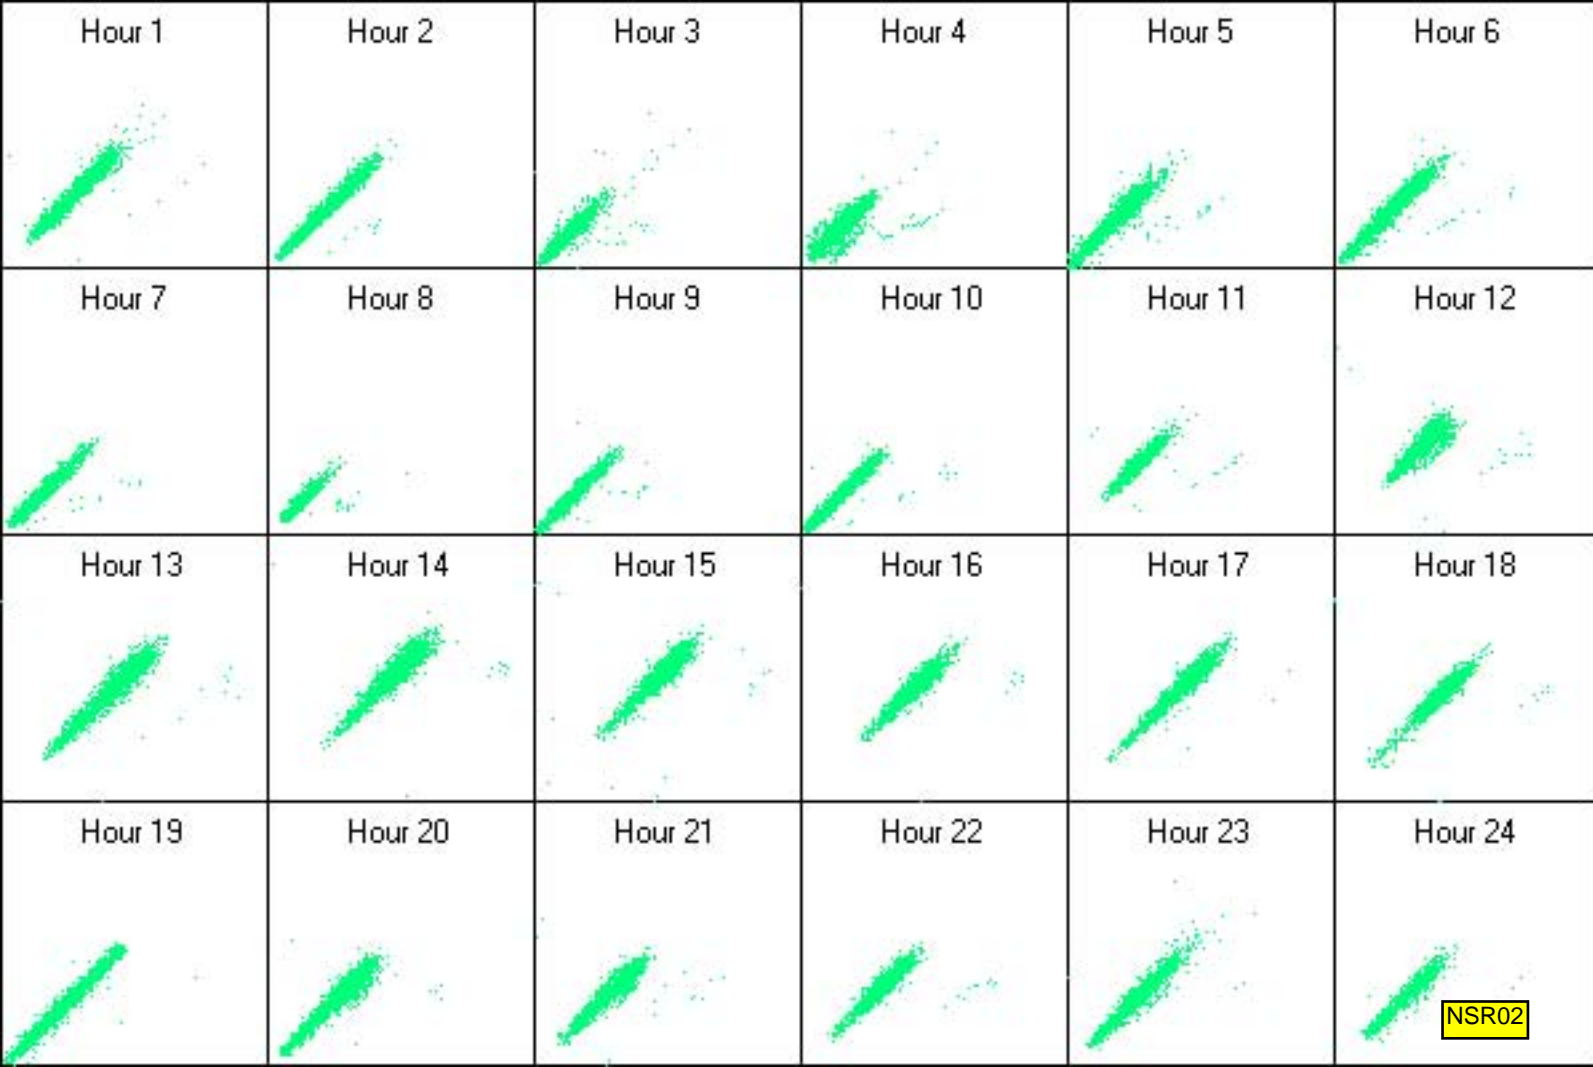

NSR02

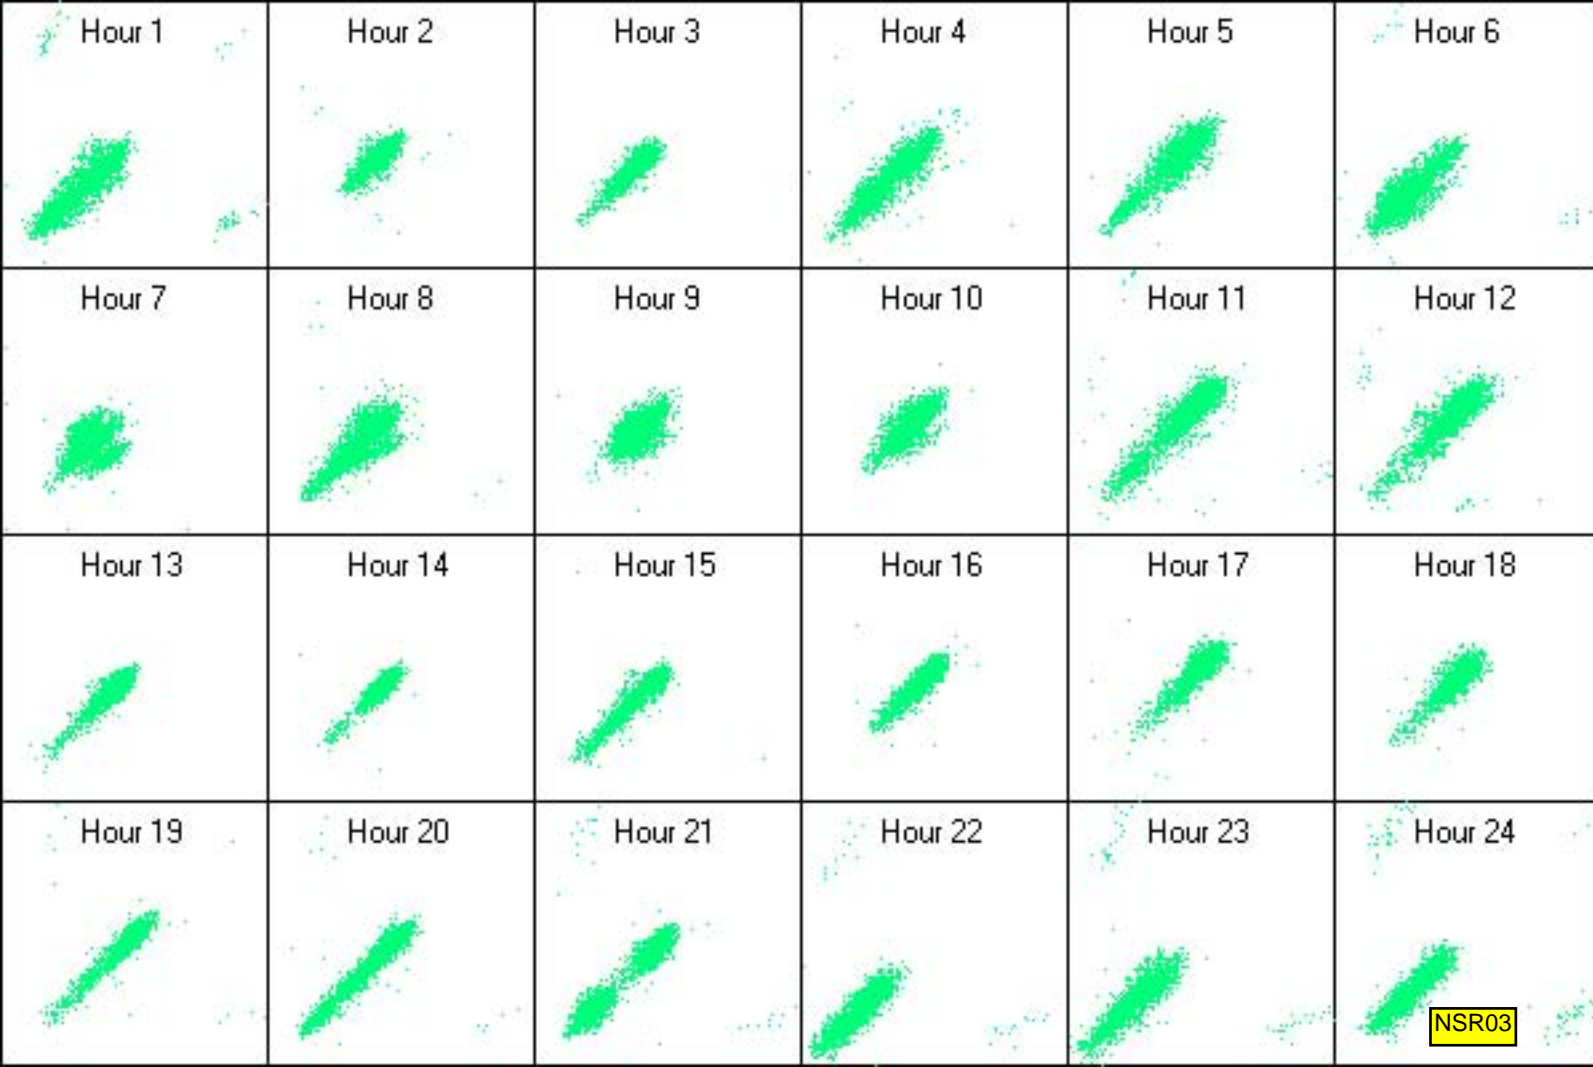

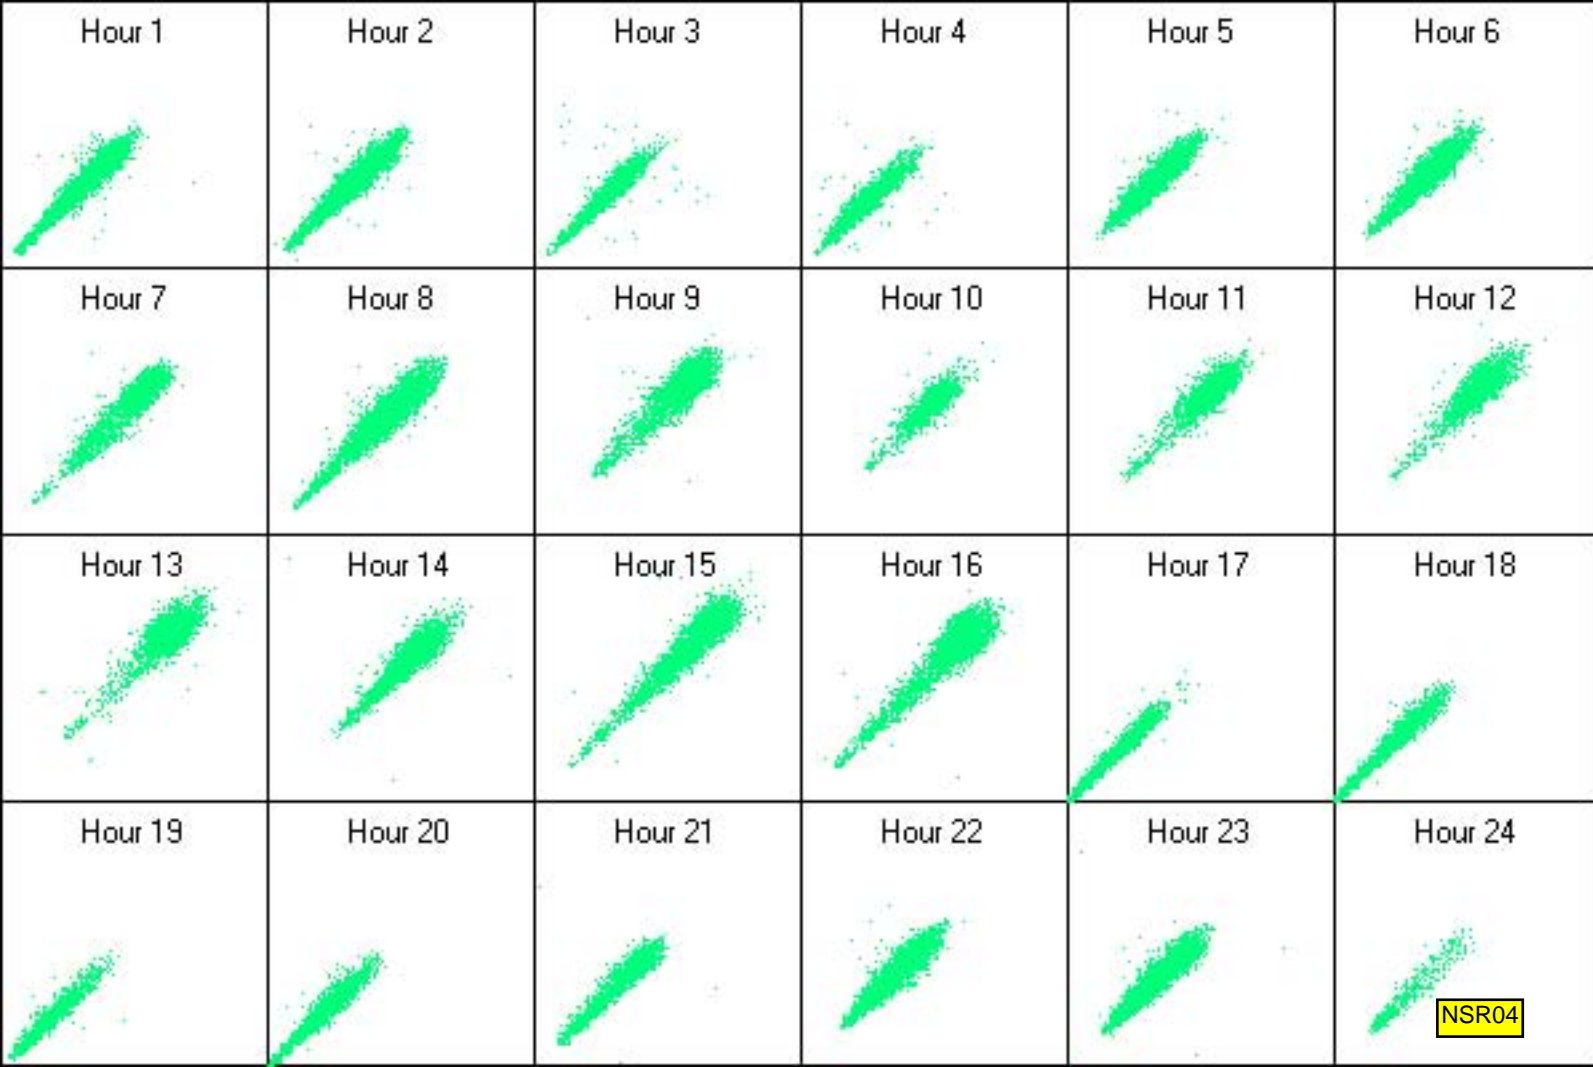

NSR04

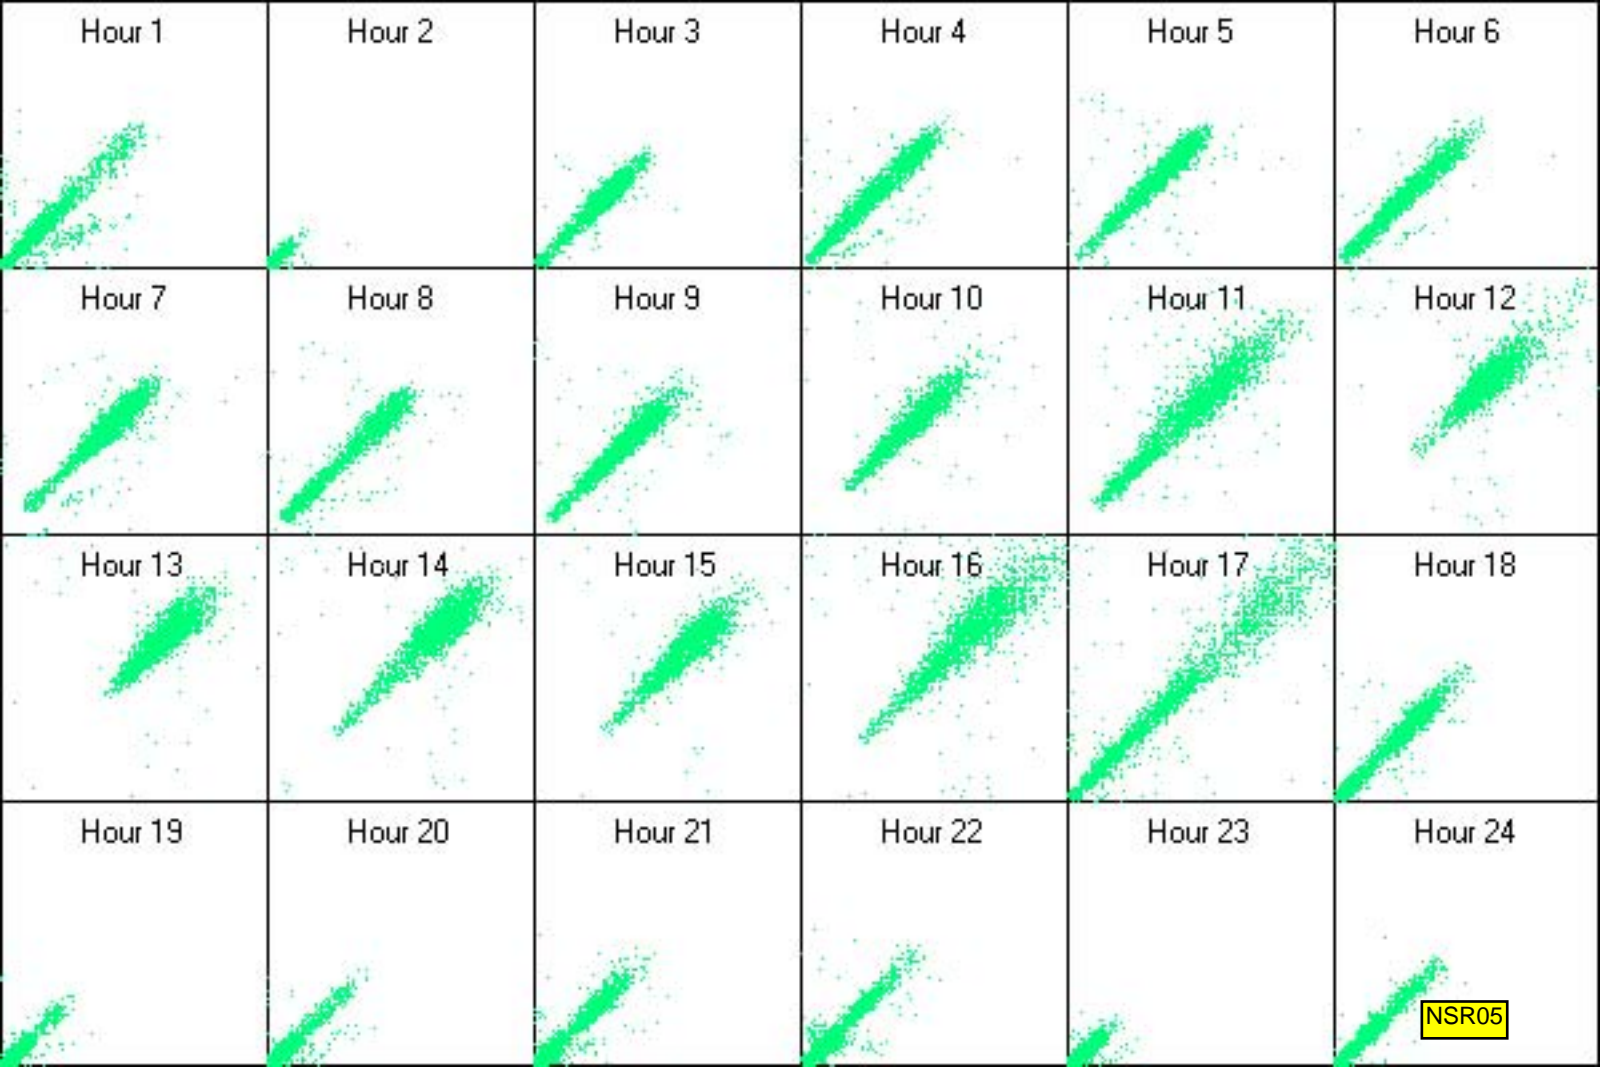

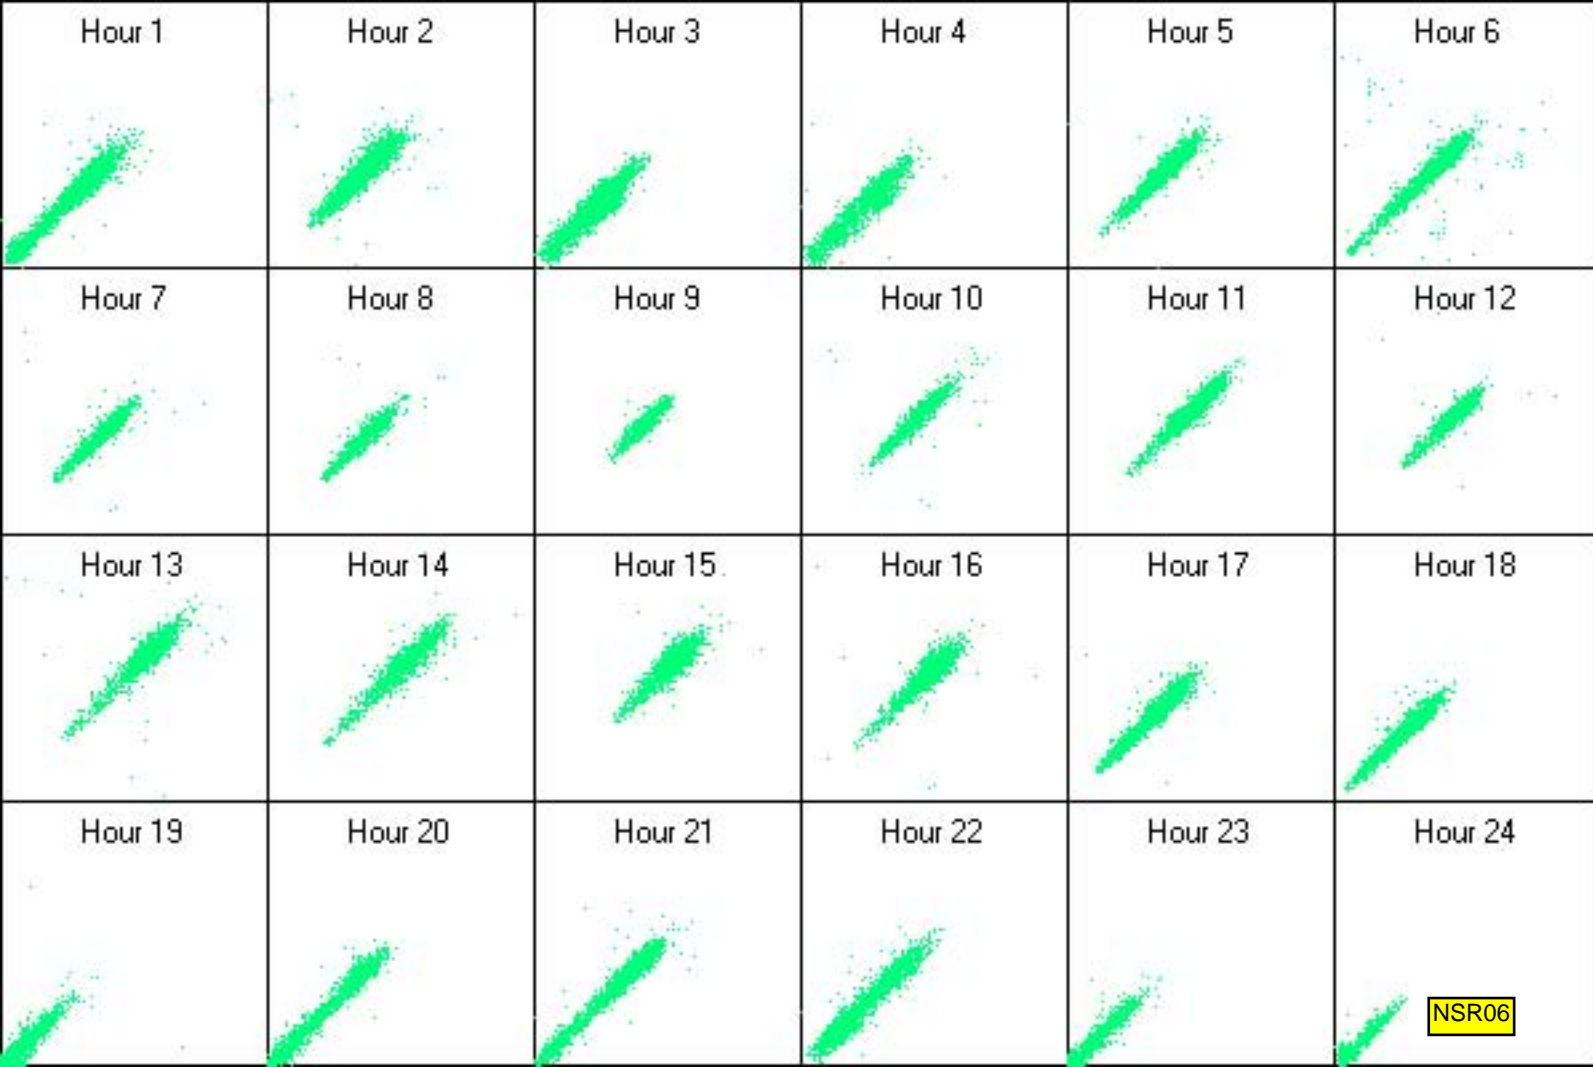

NSR06

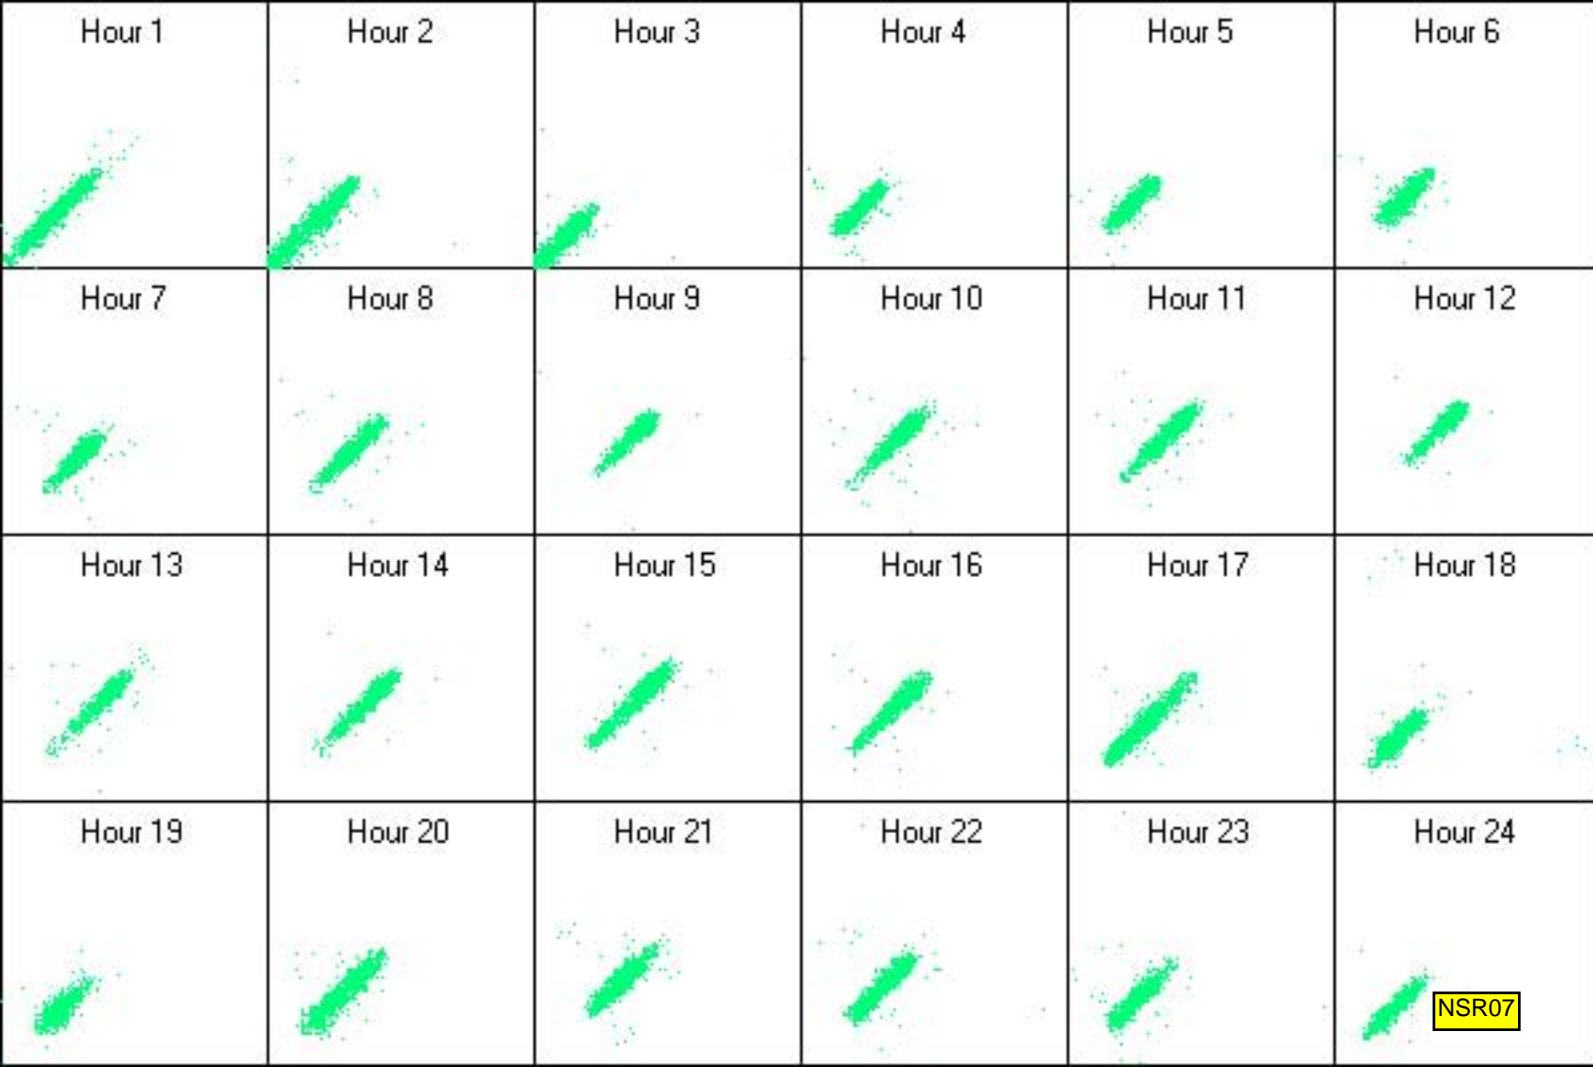

NSR07



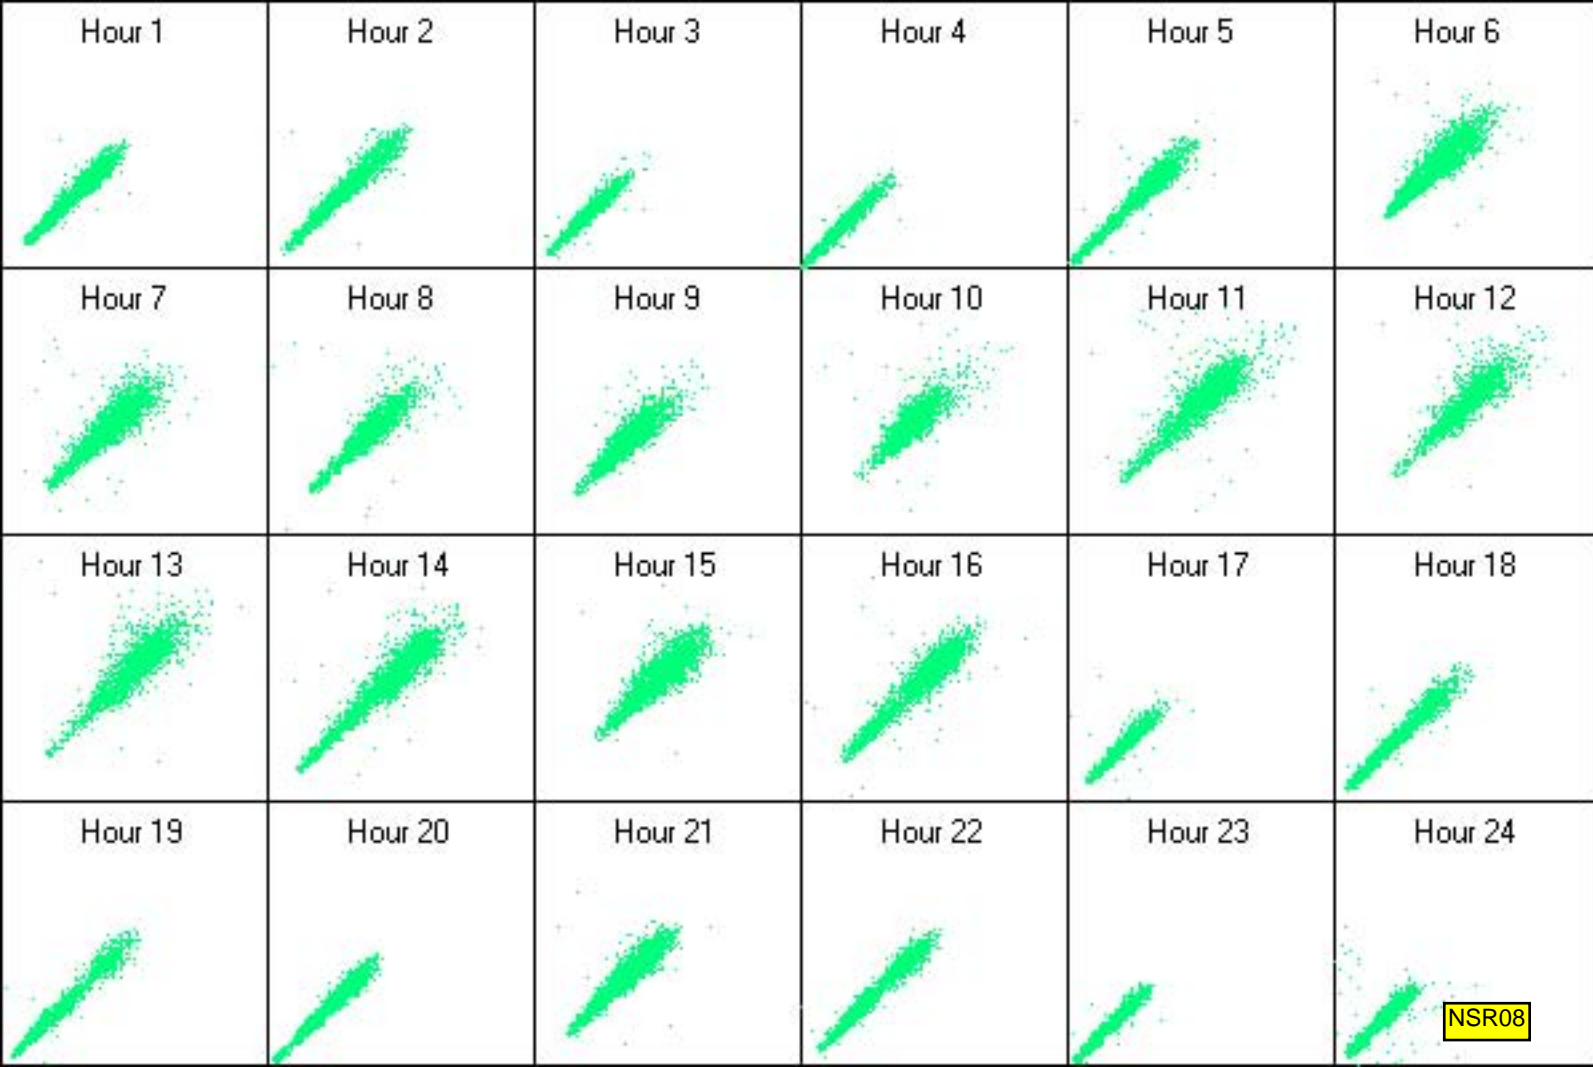

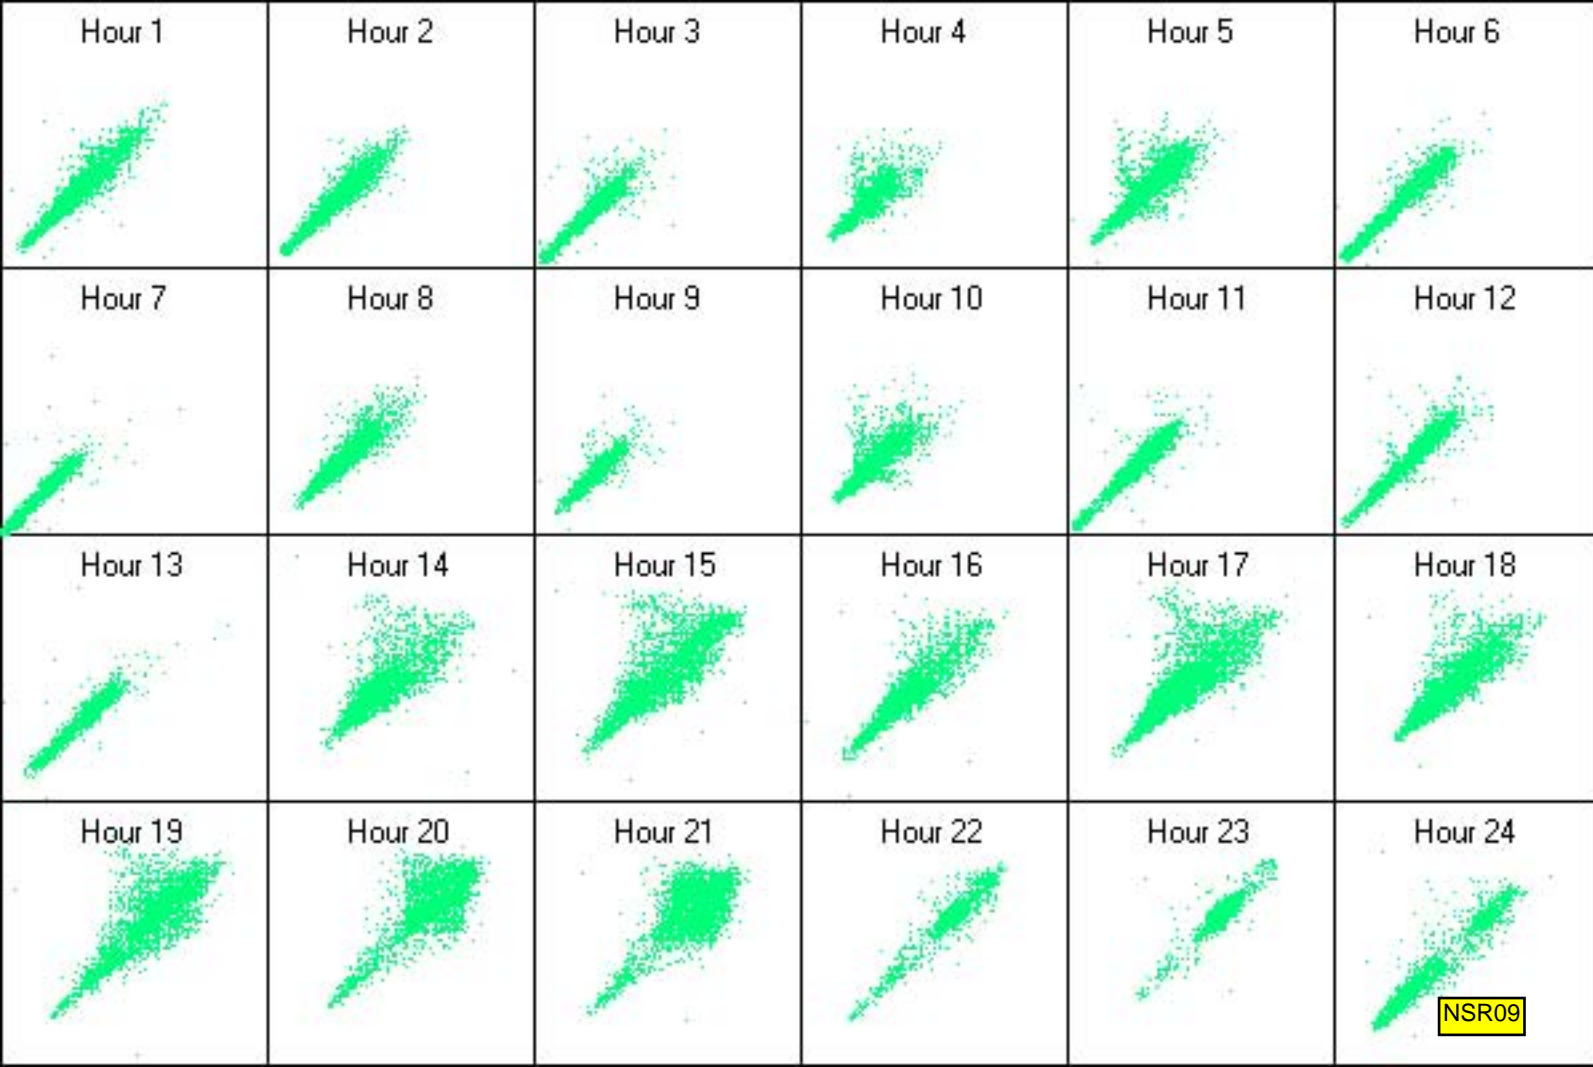

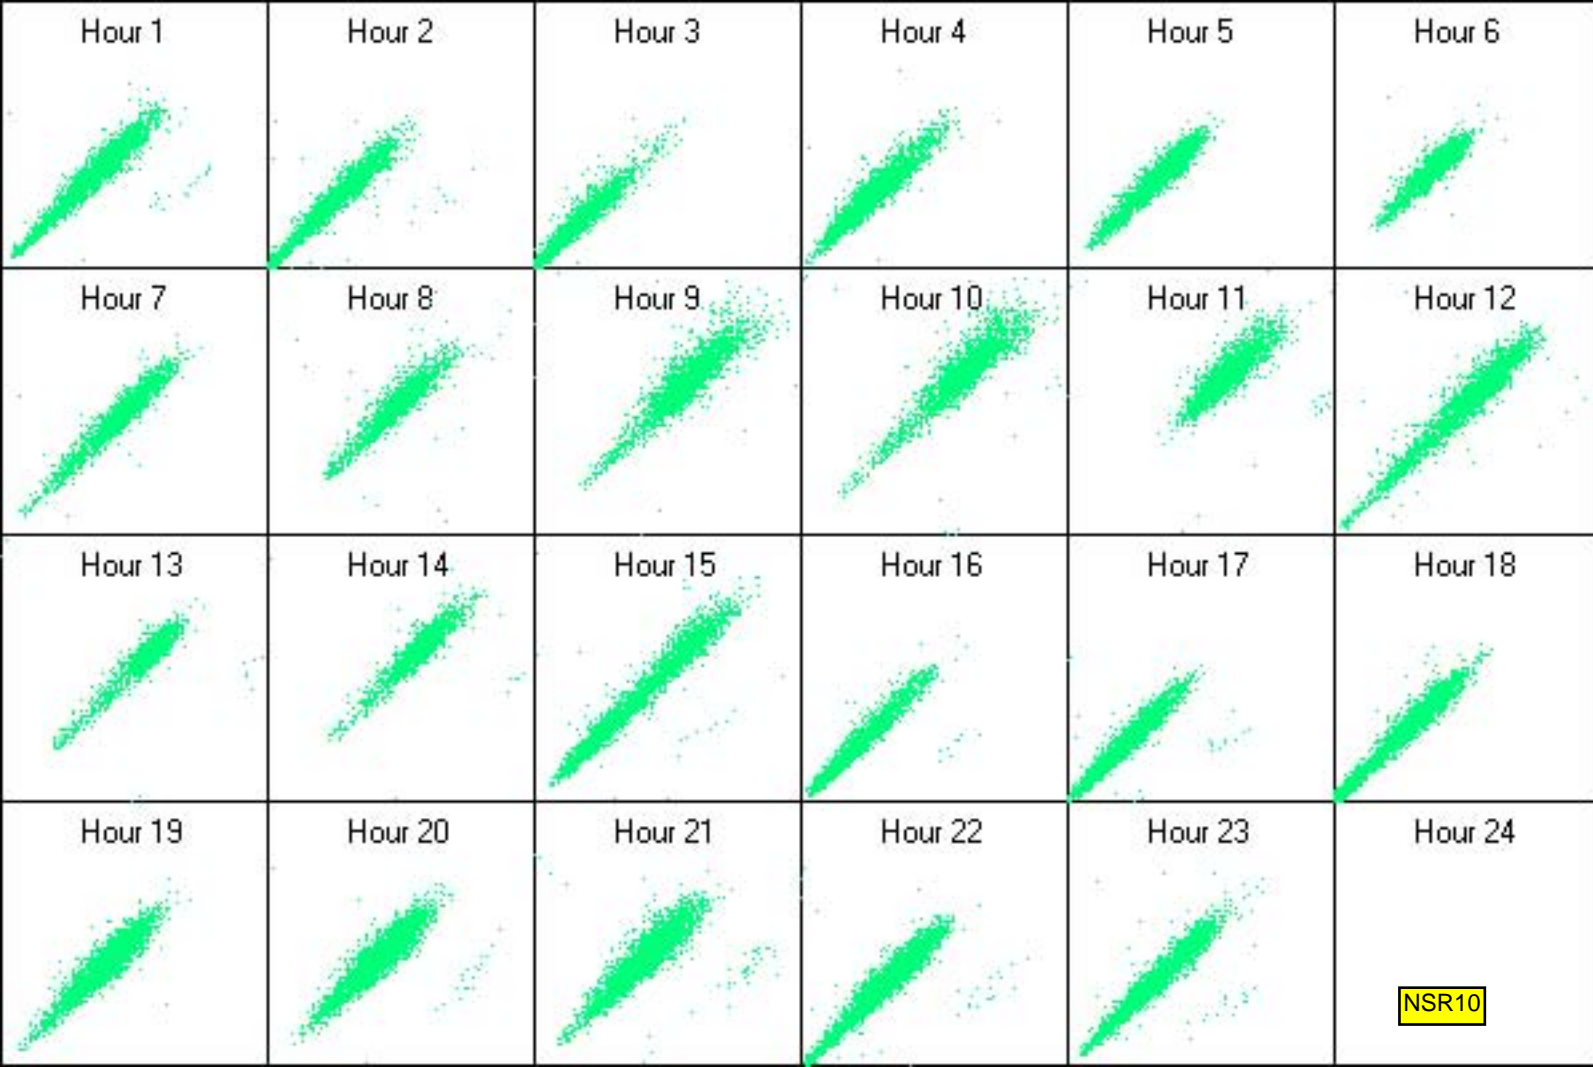

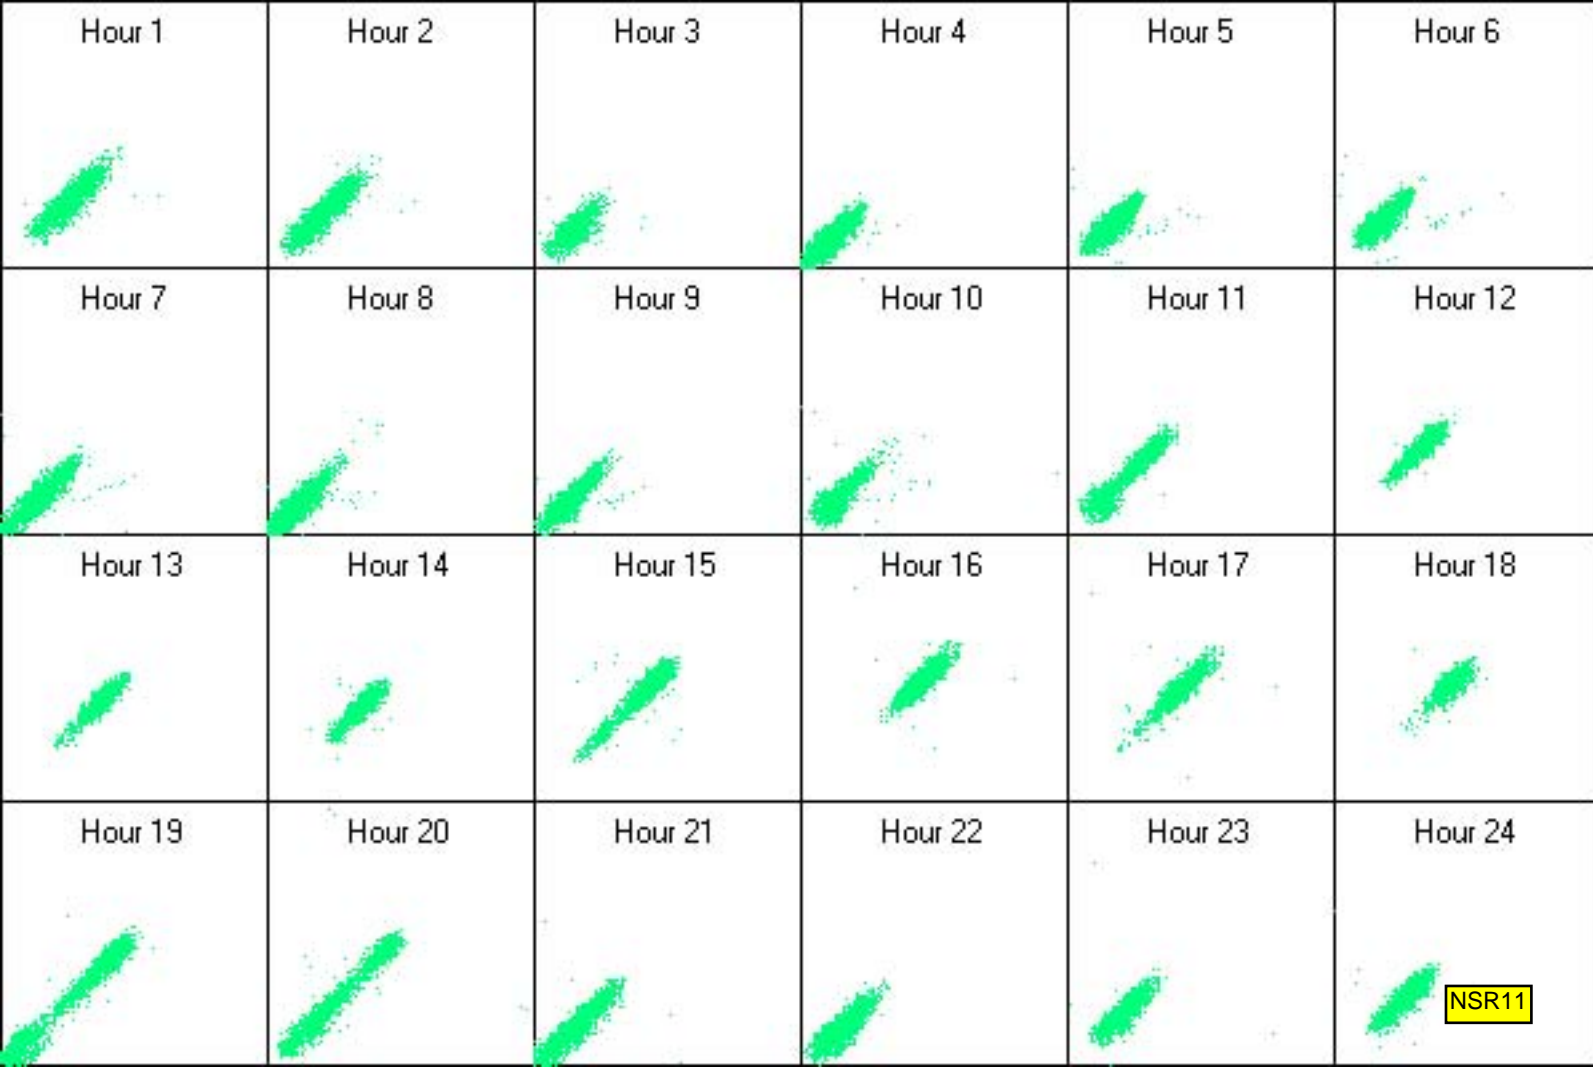

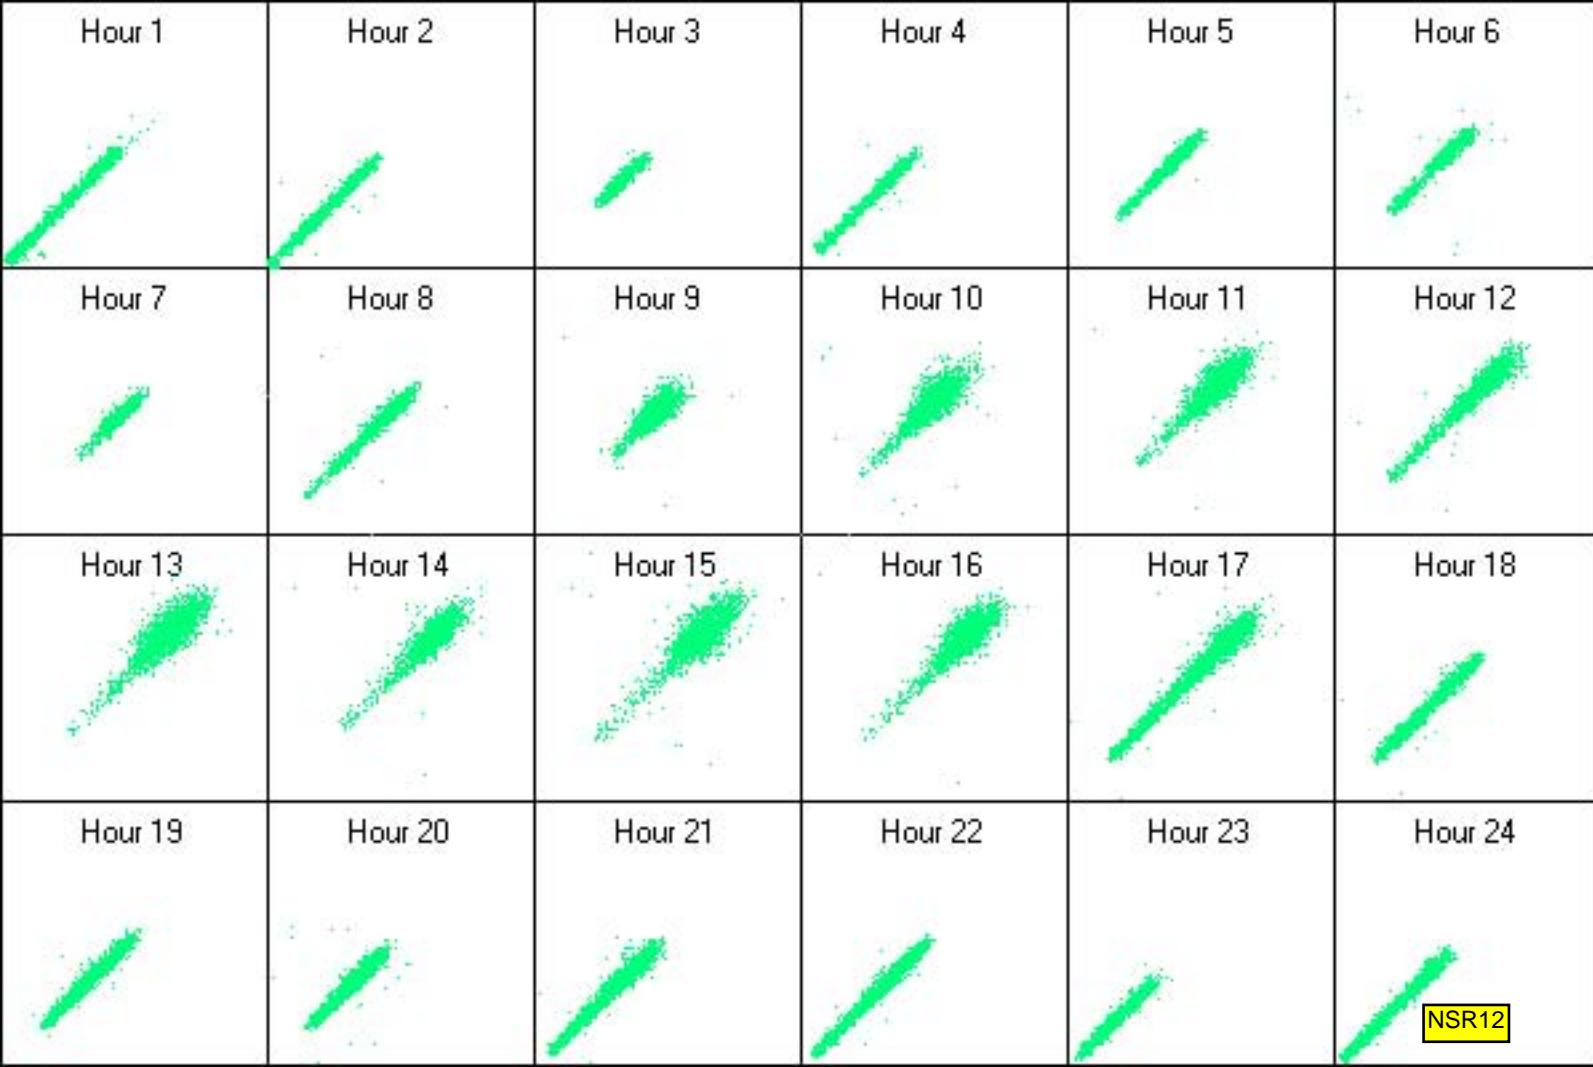

NSR12

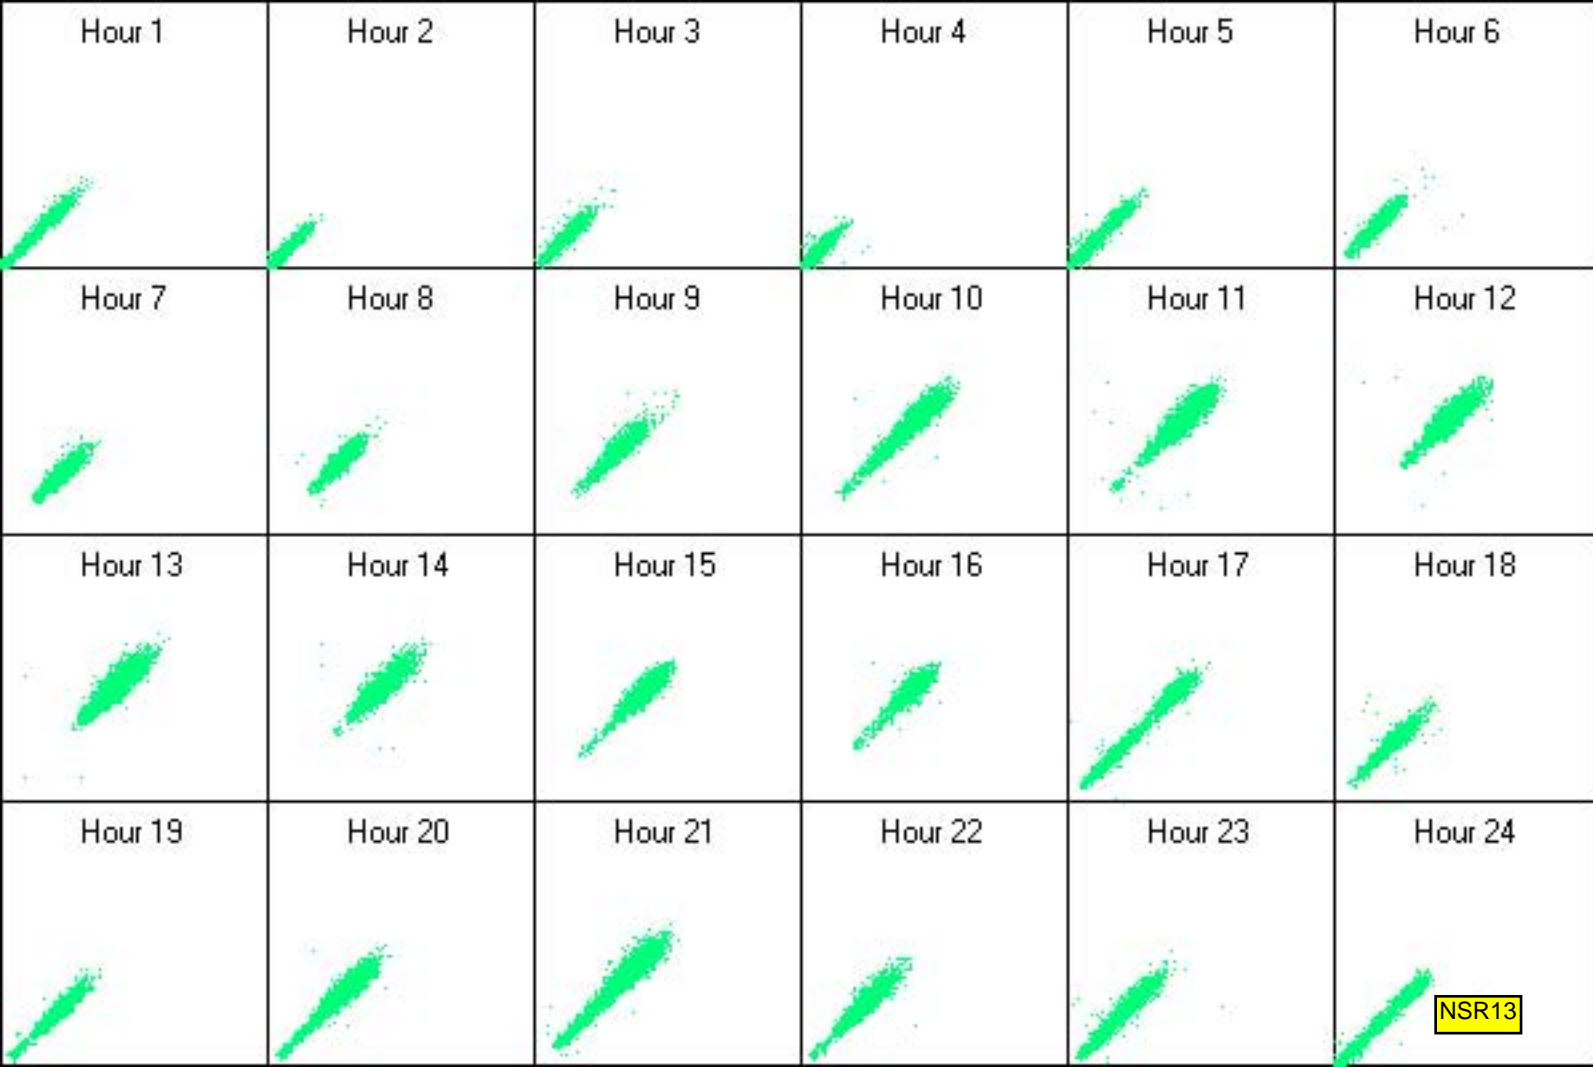

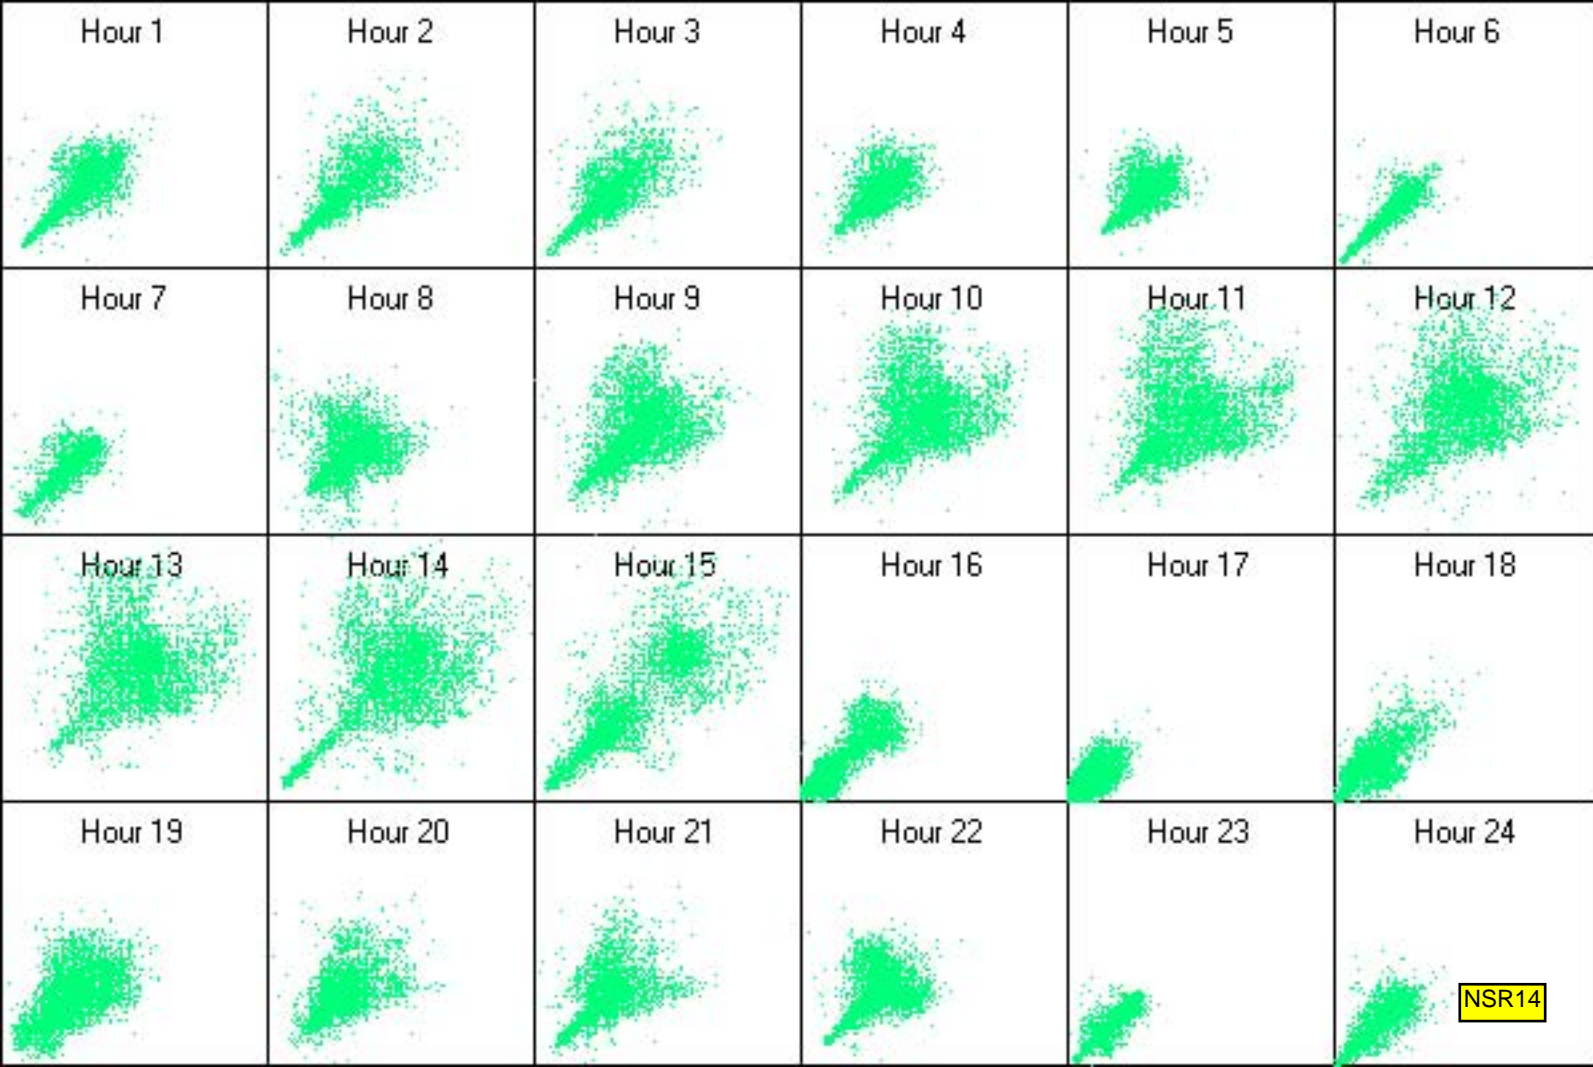

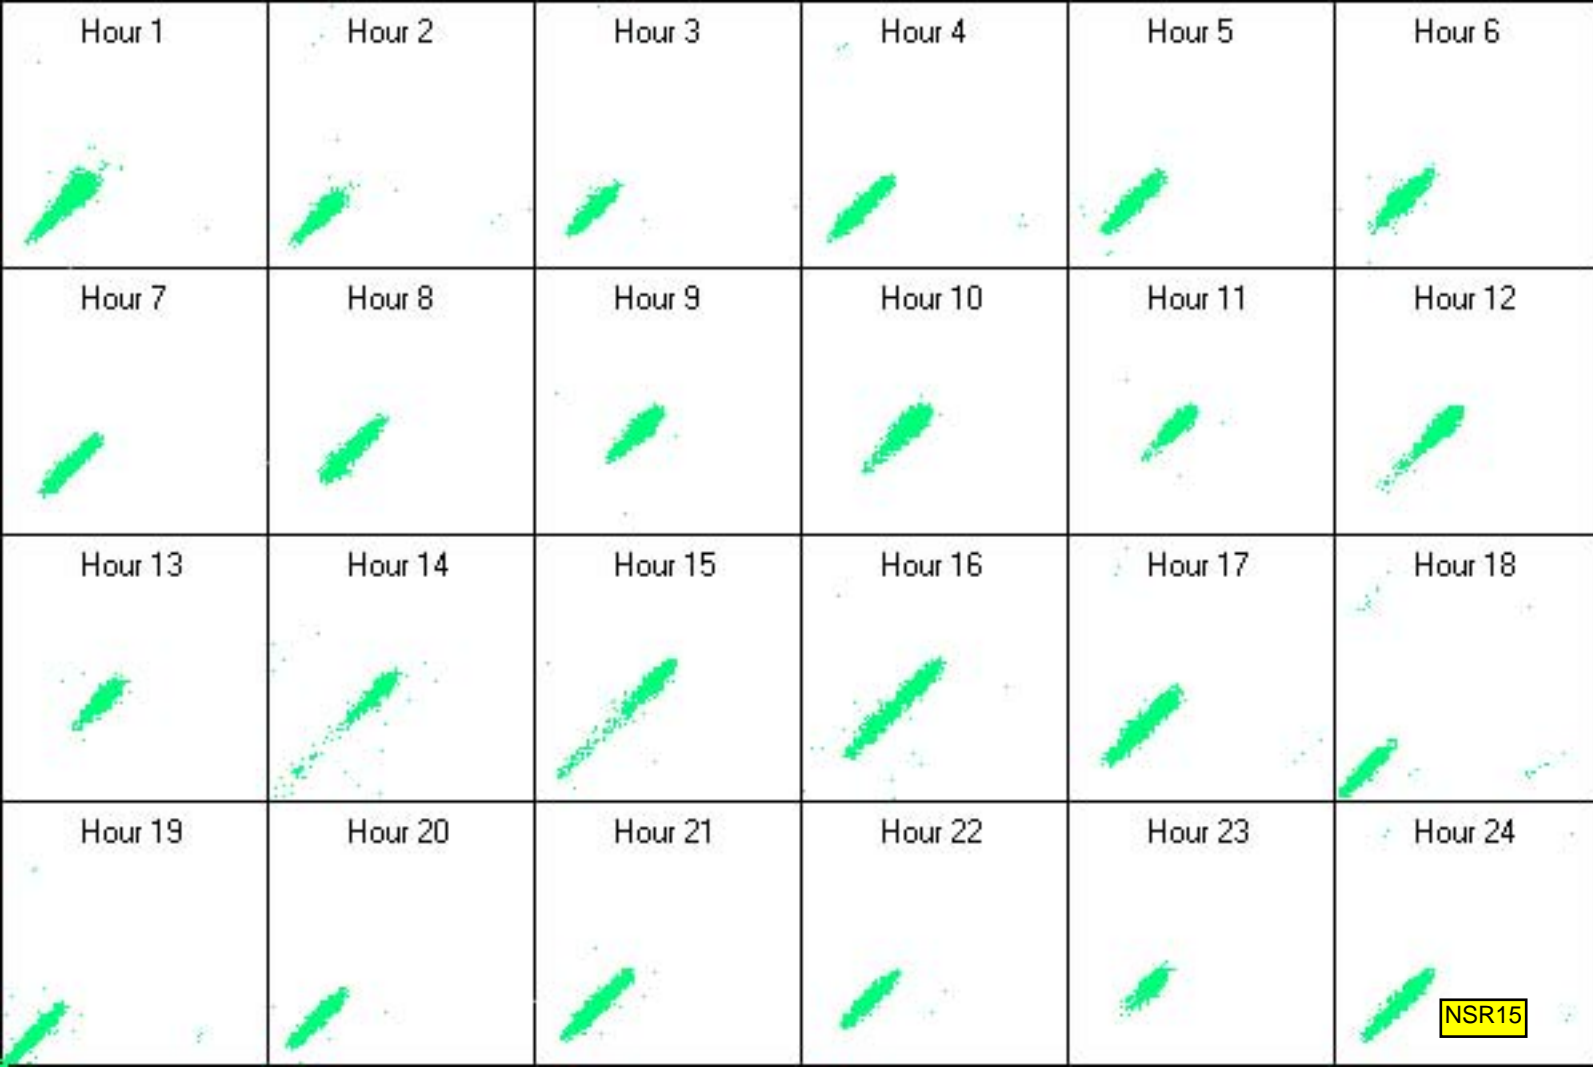

NSR15



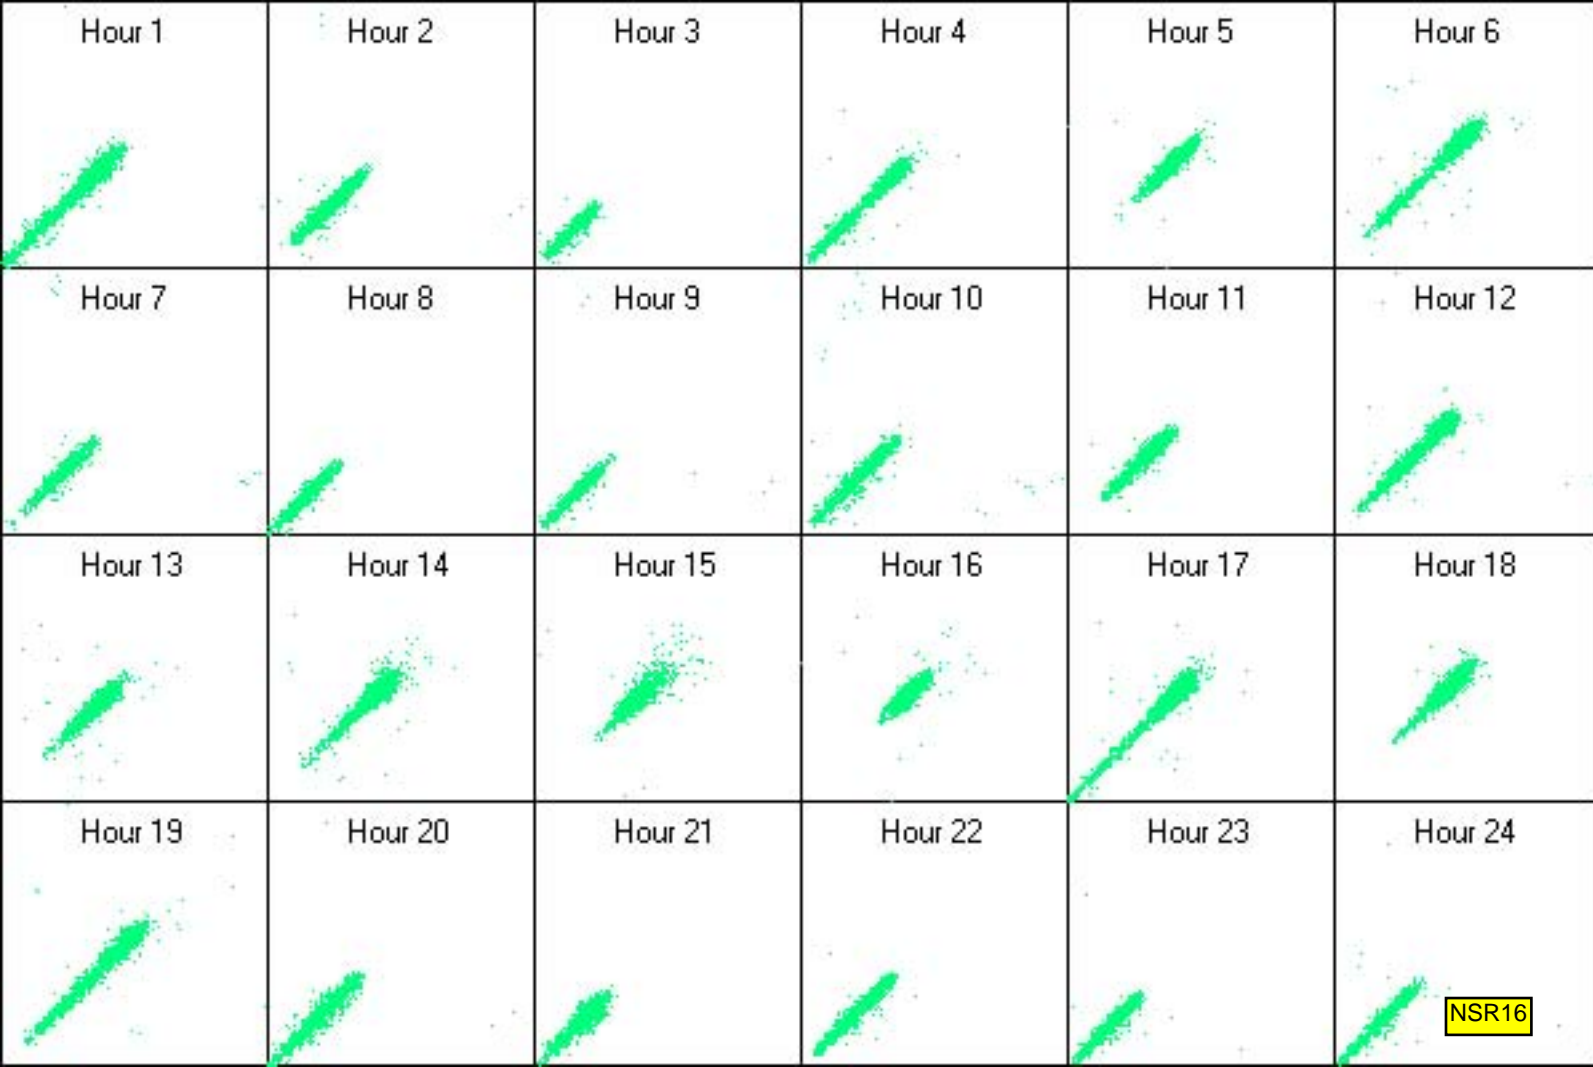

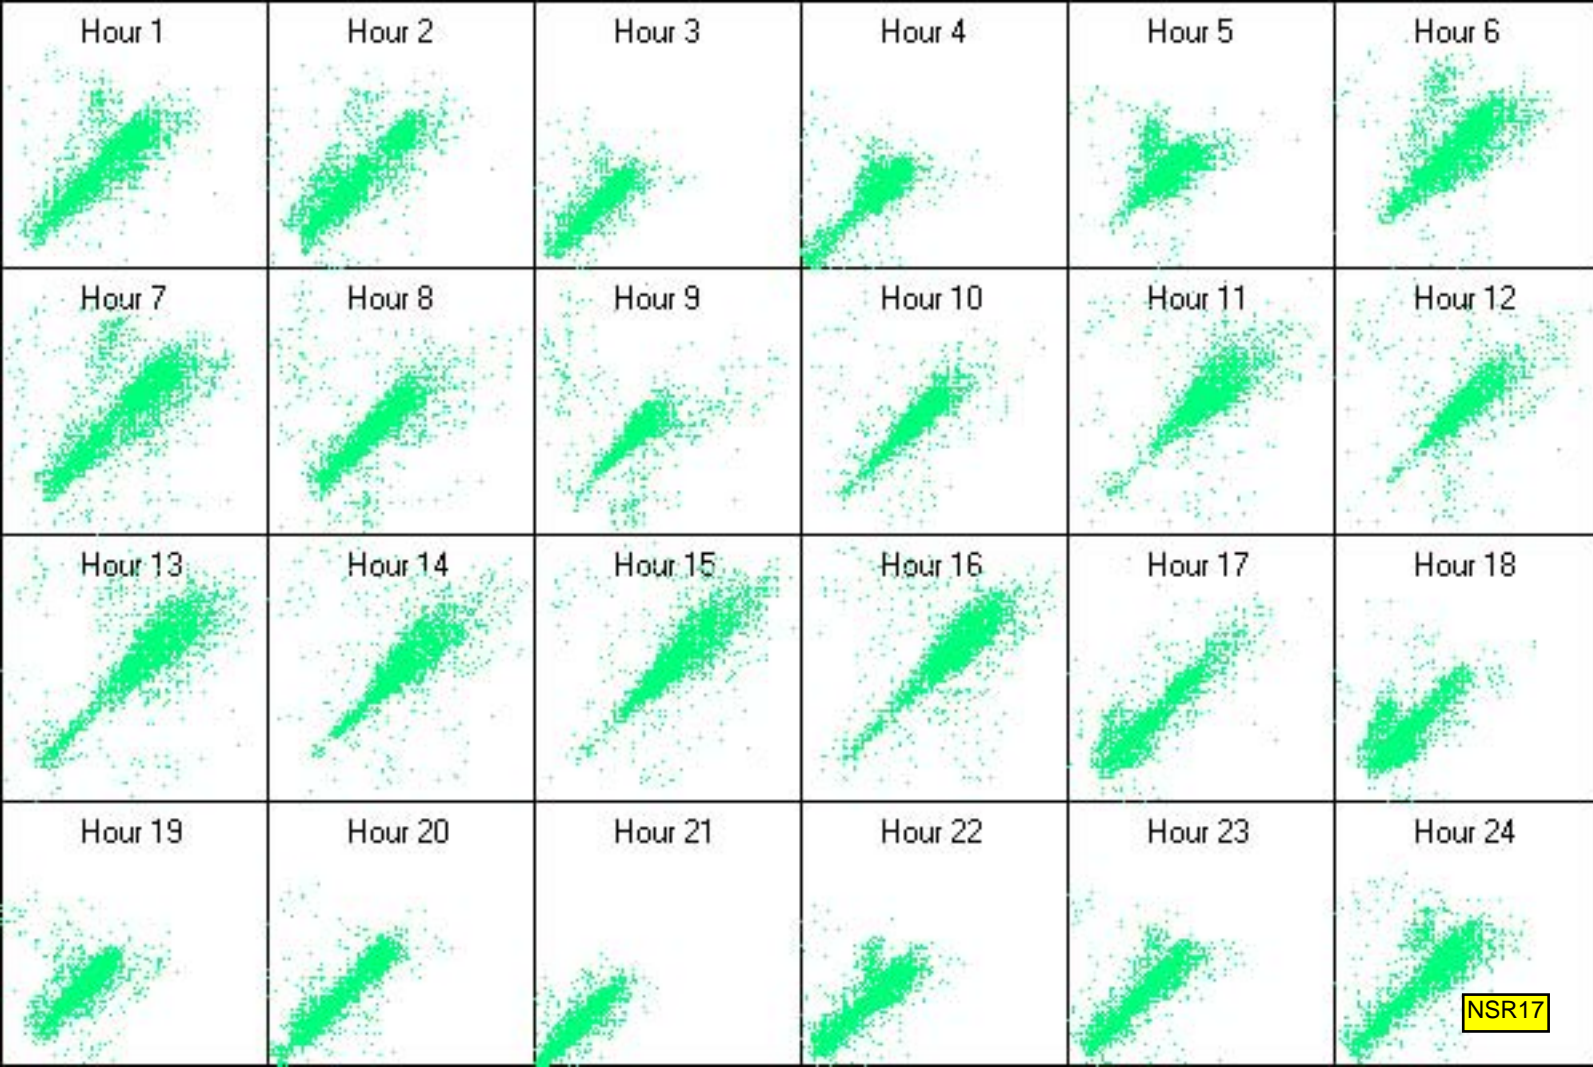

NSR17

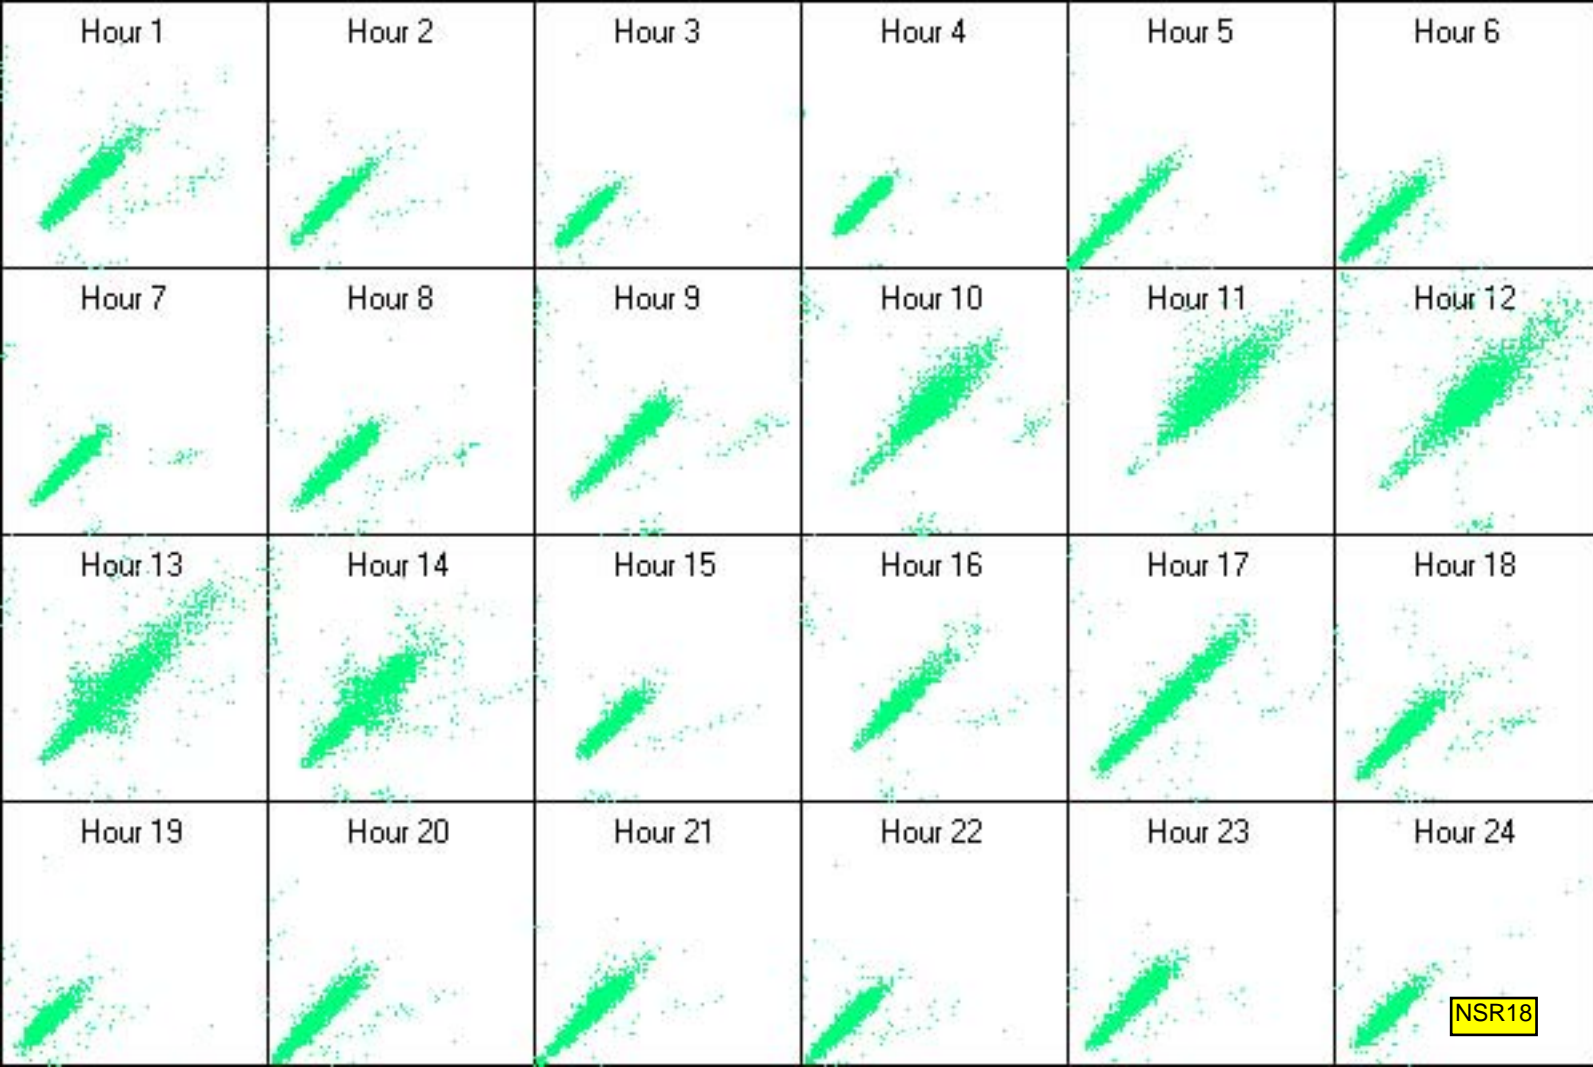

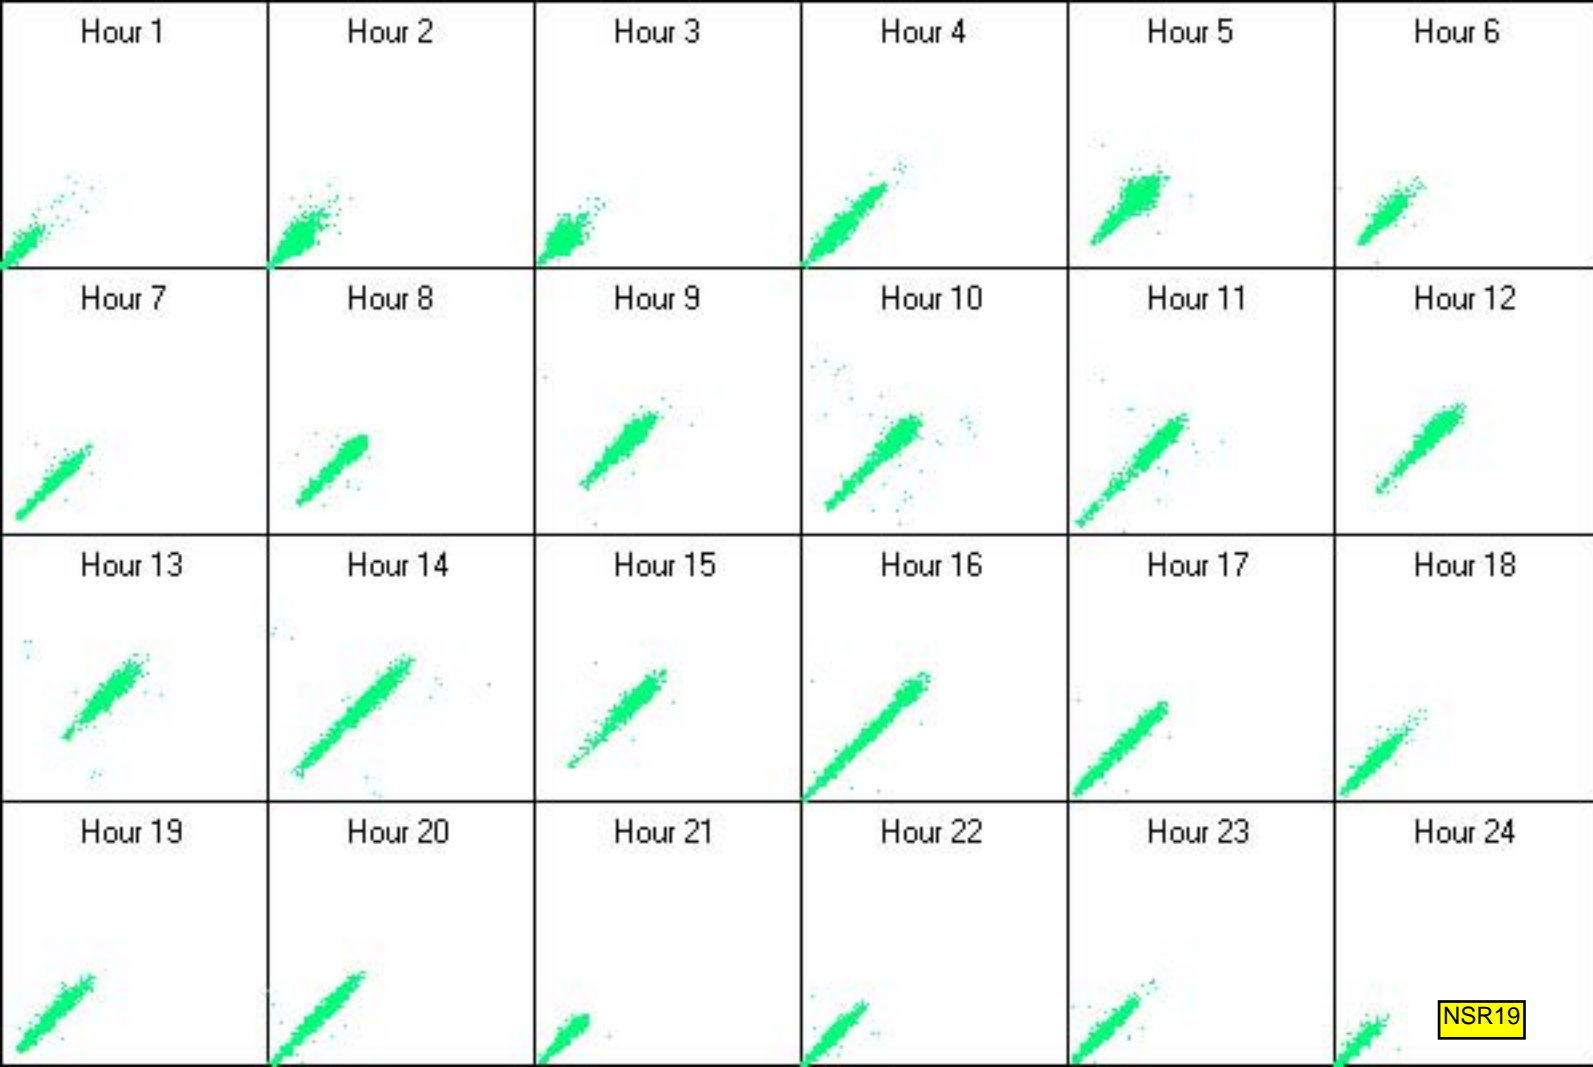

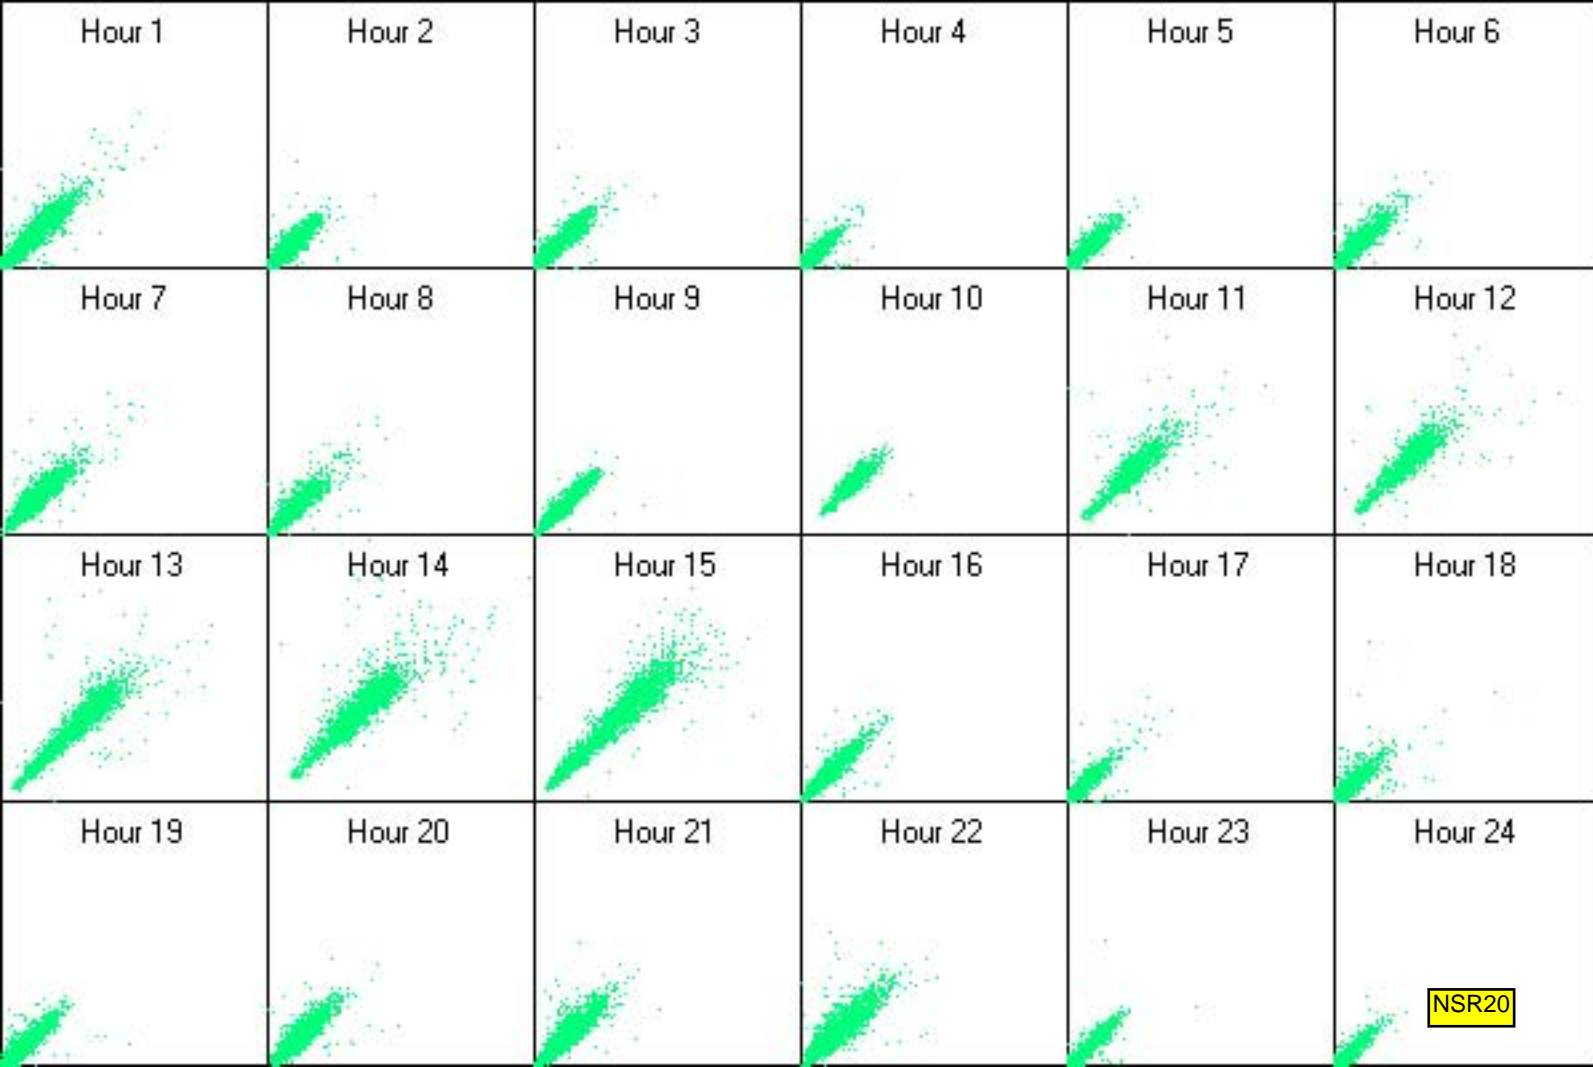

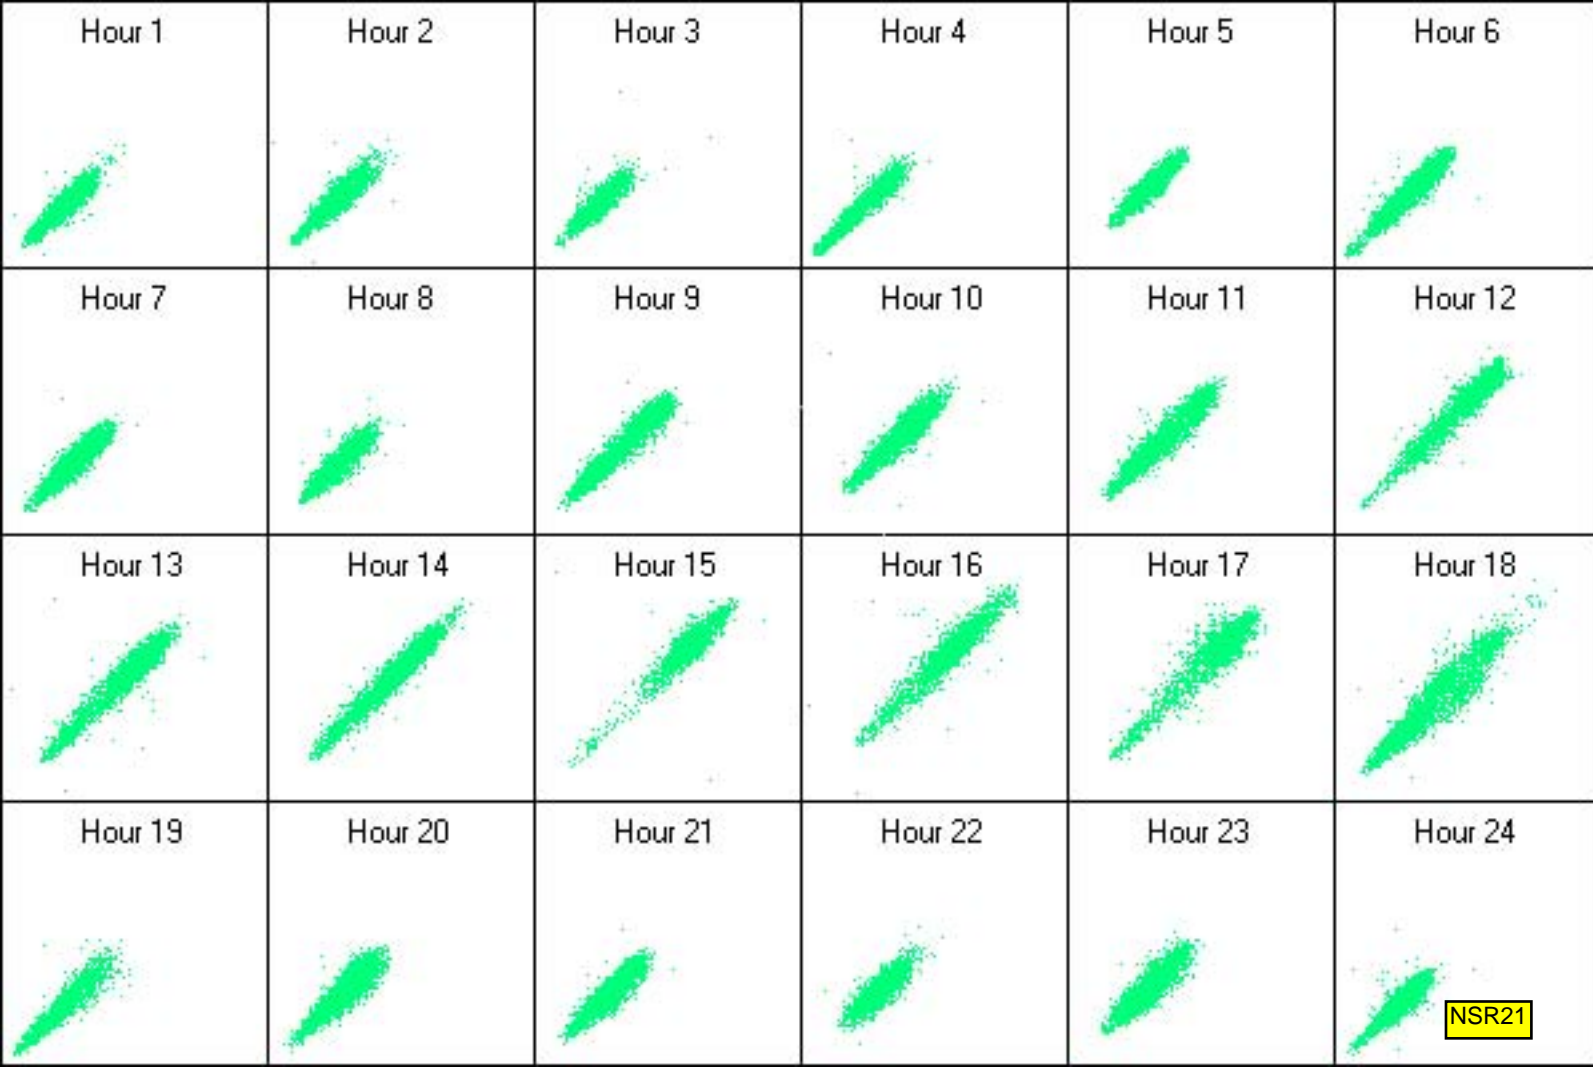

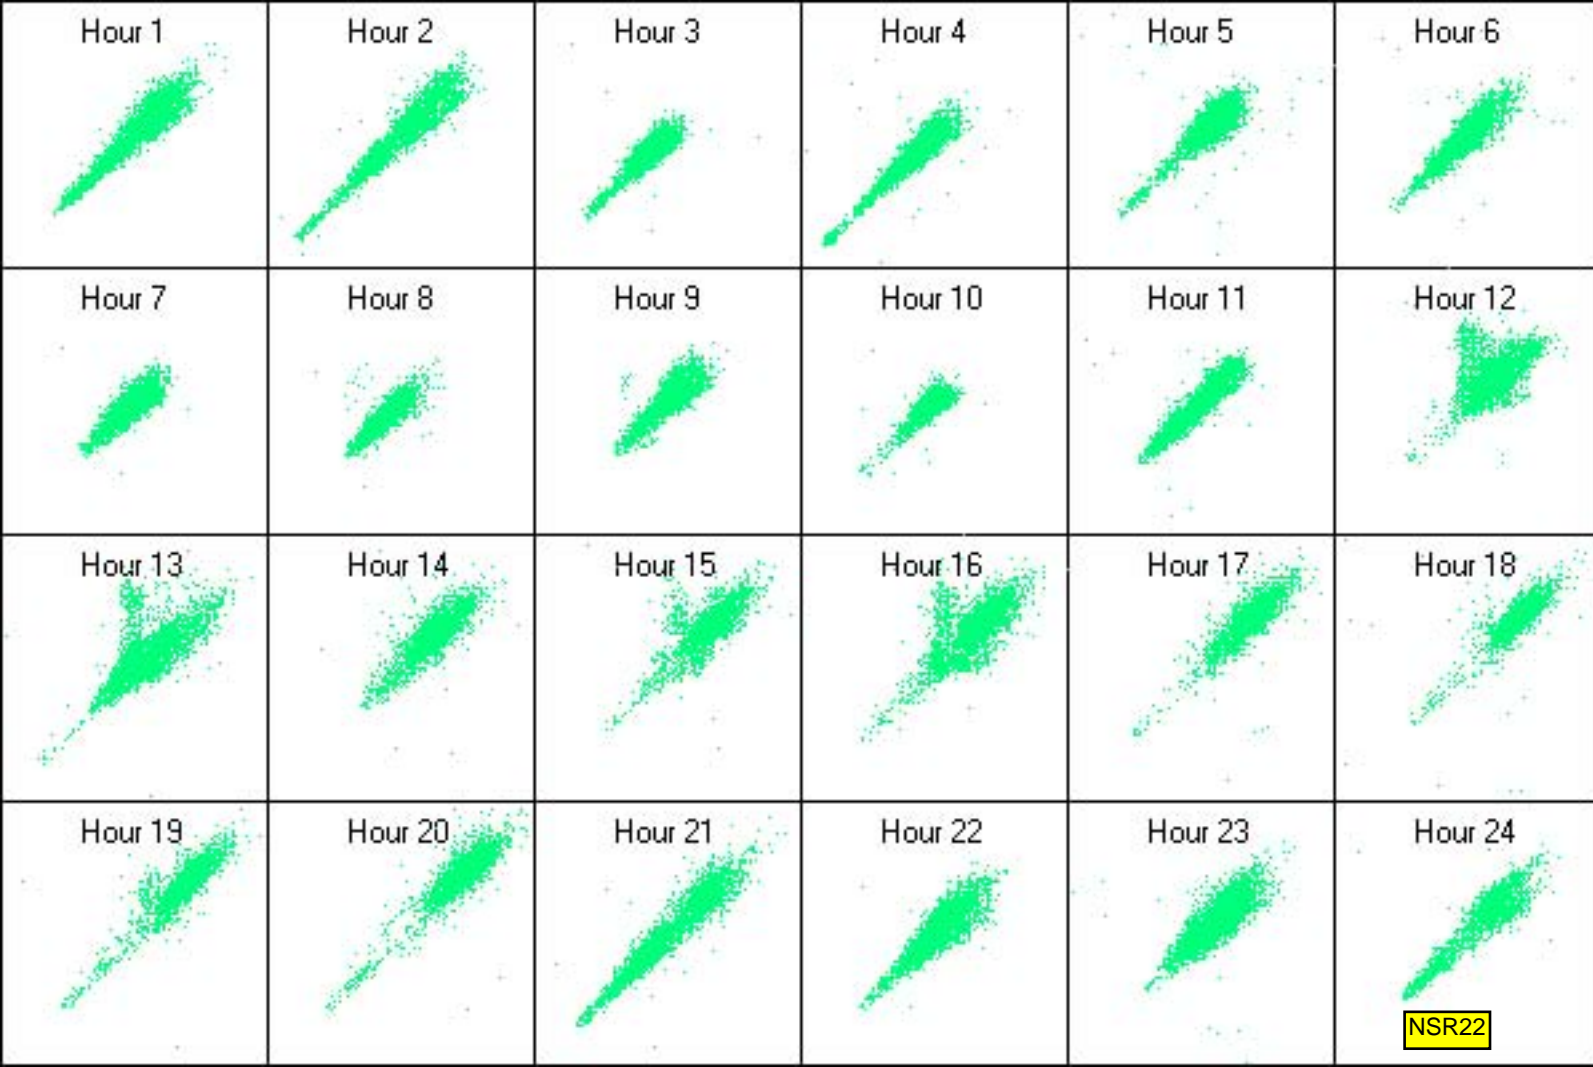

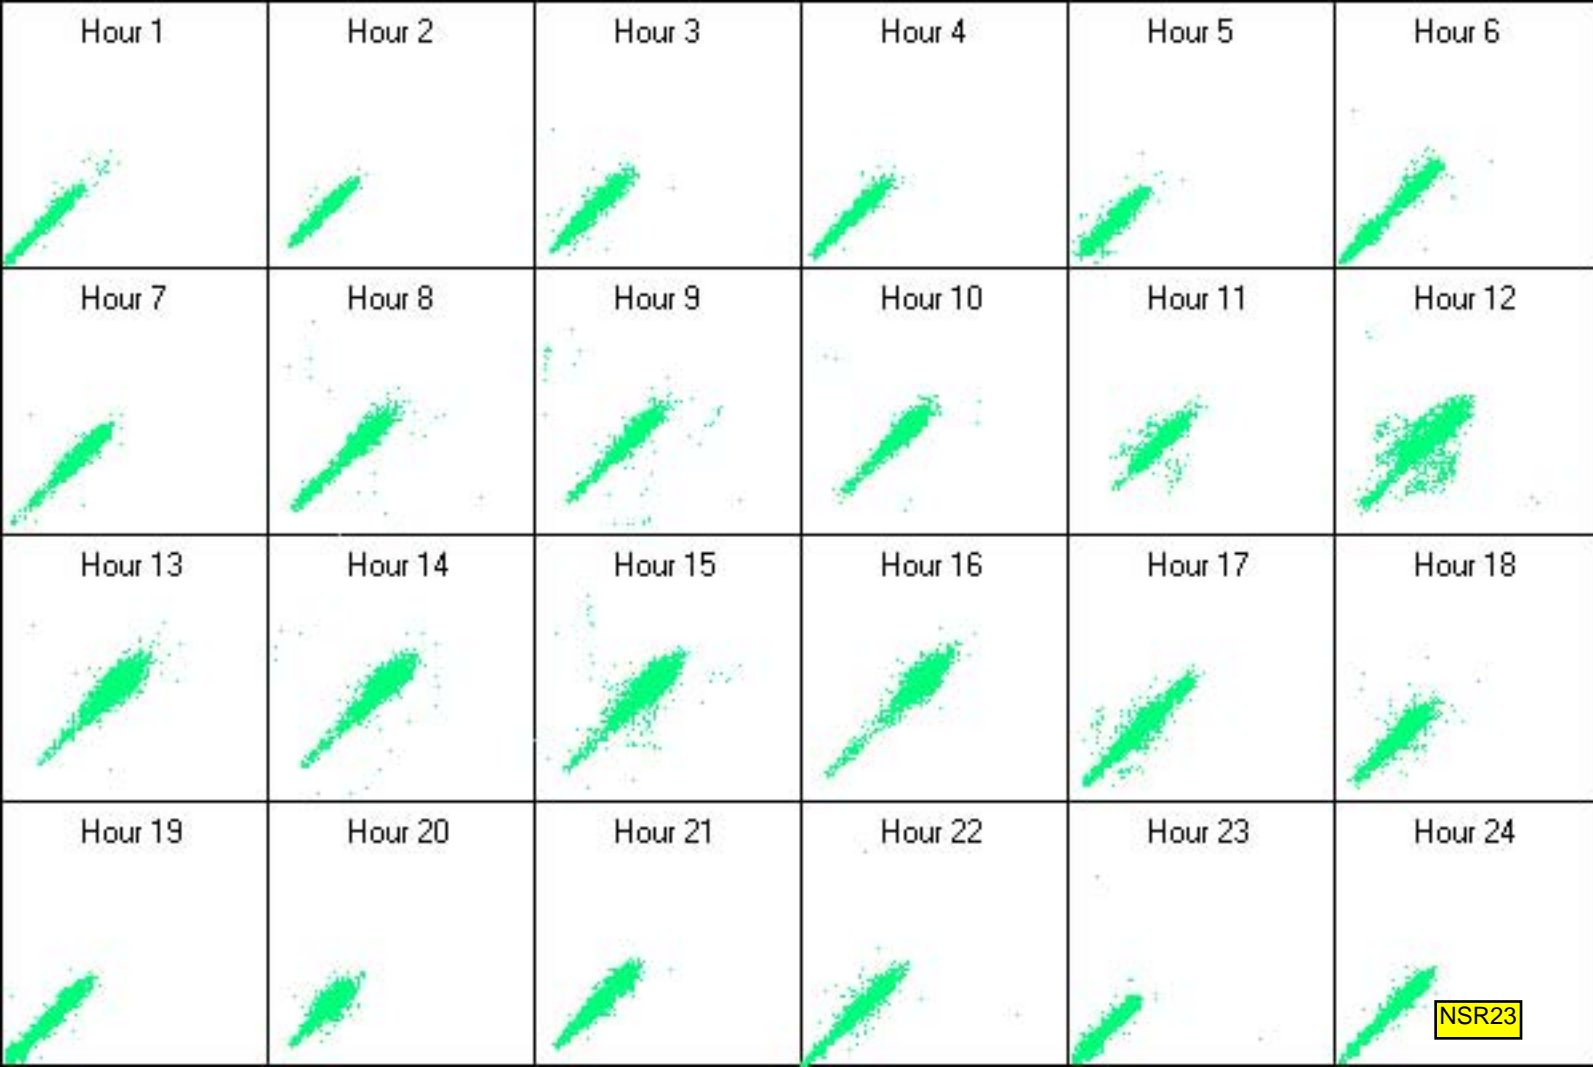

NSR23



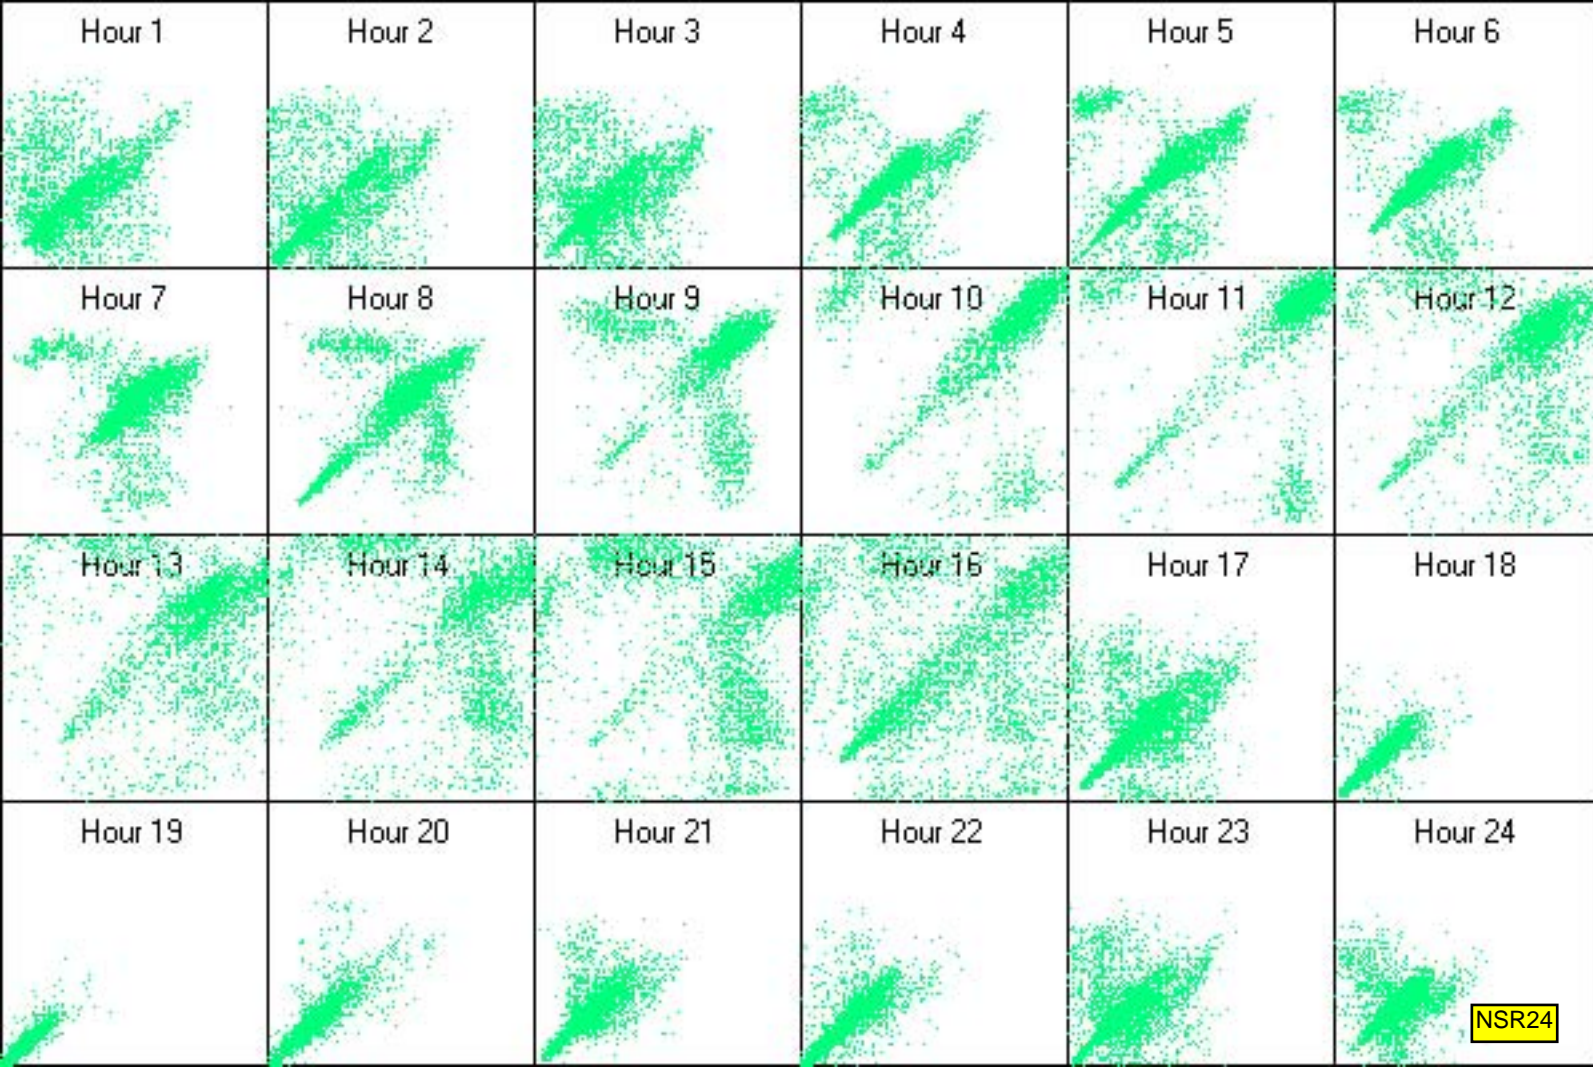

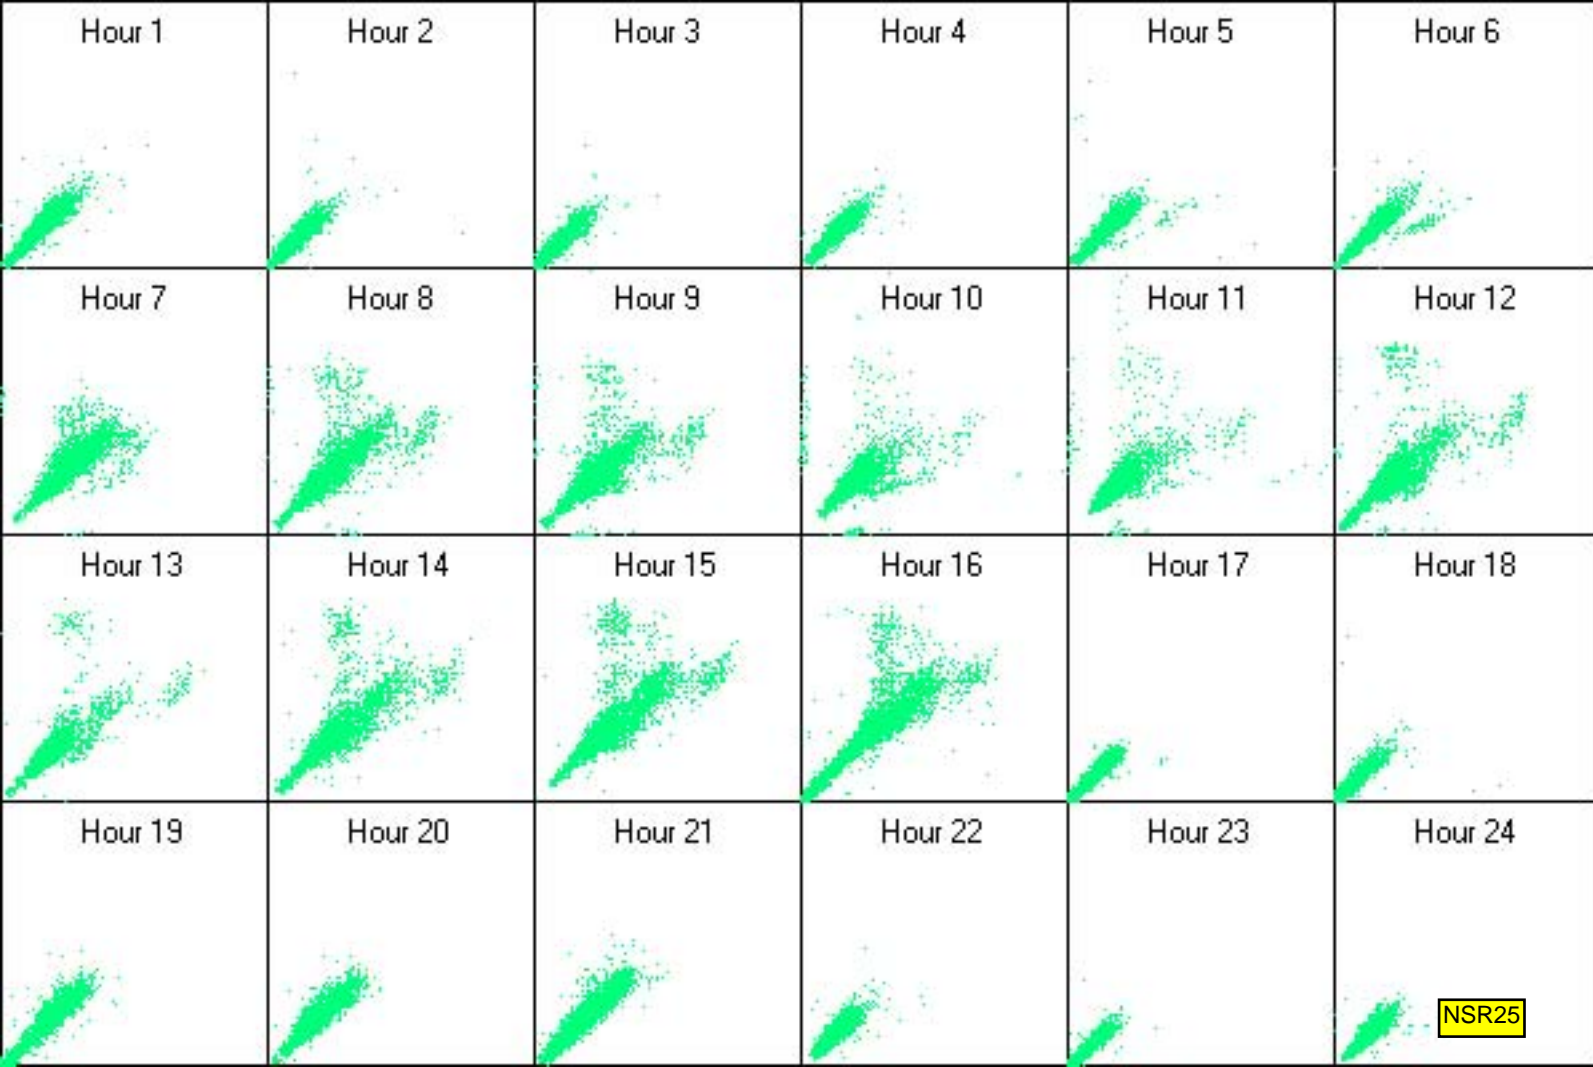

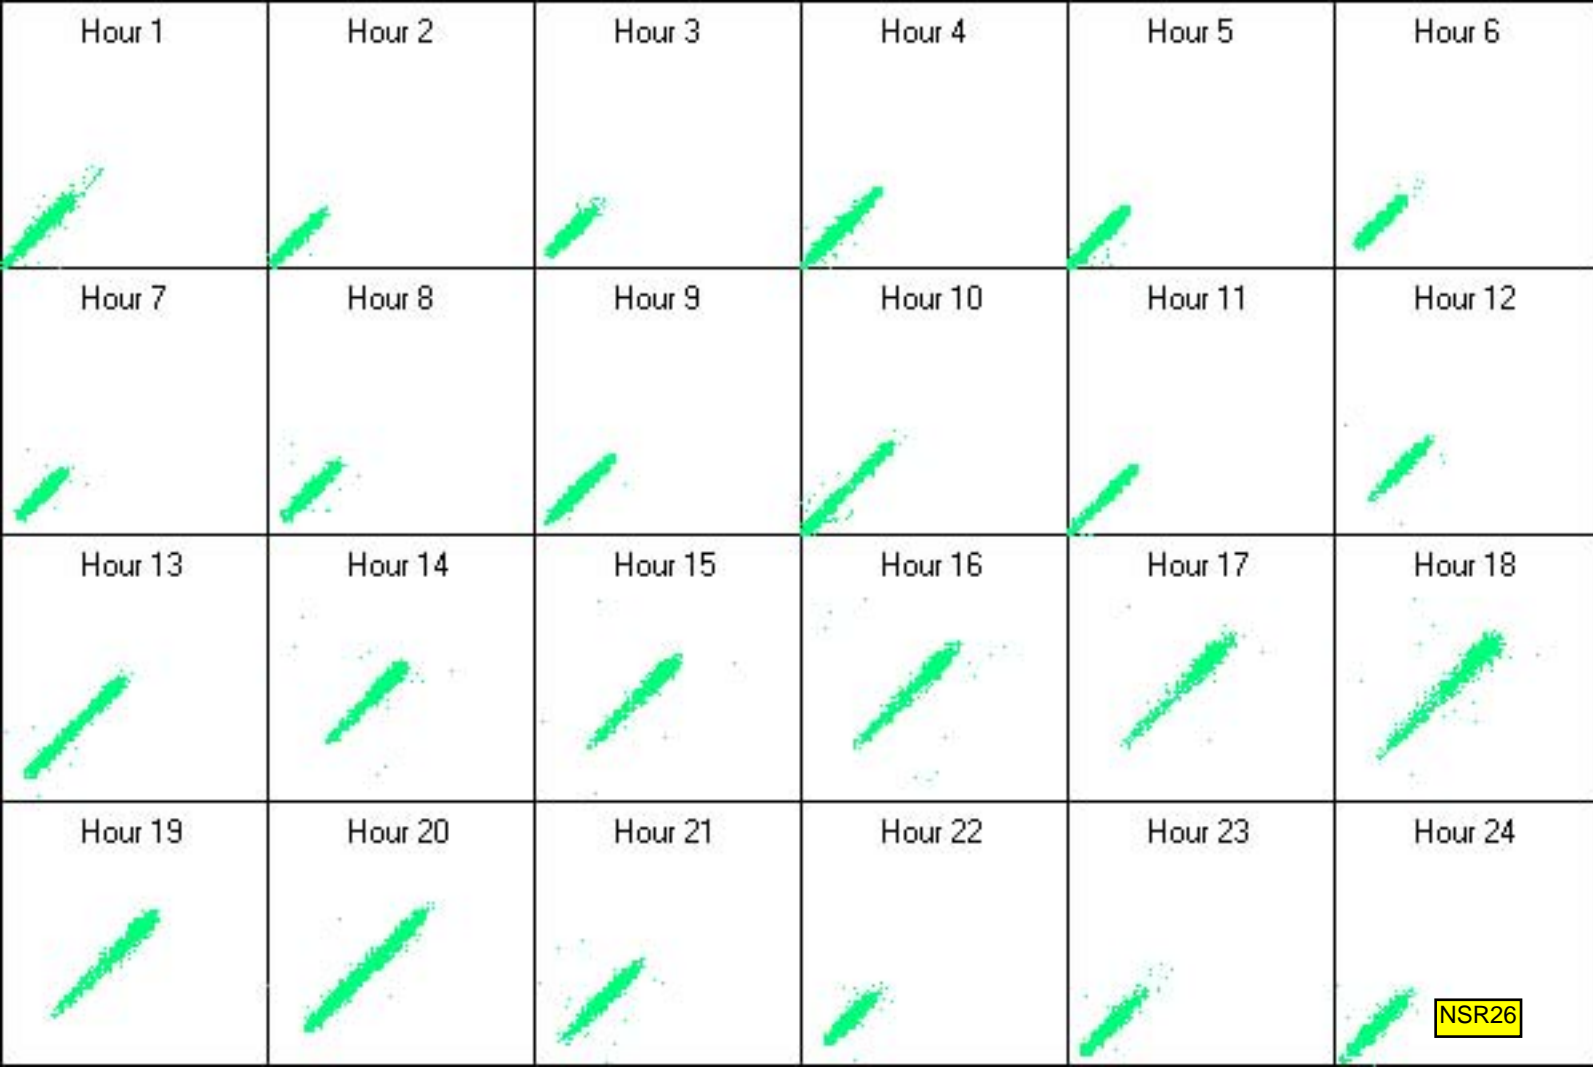

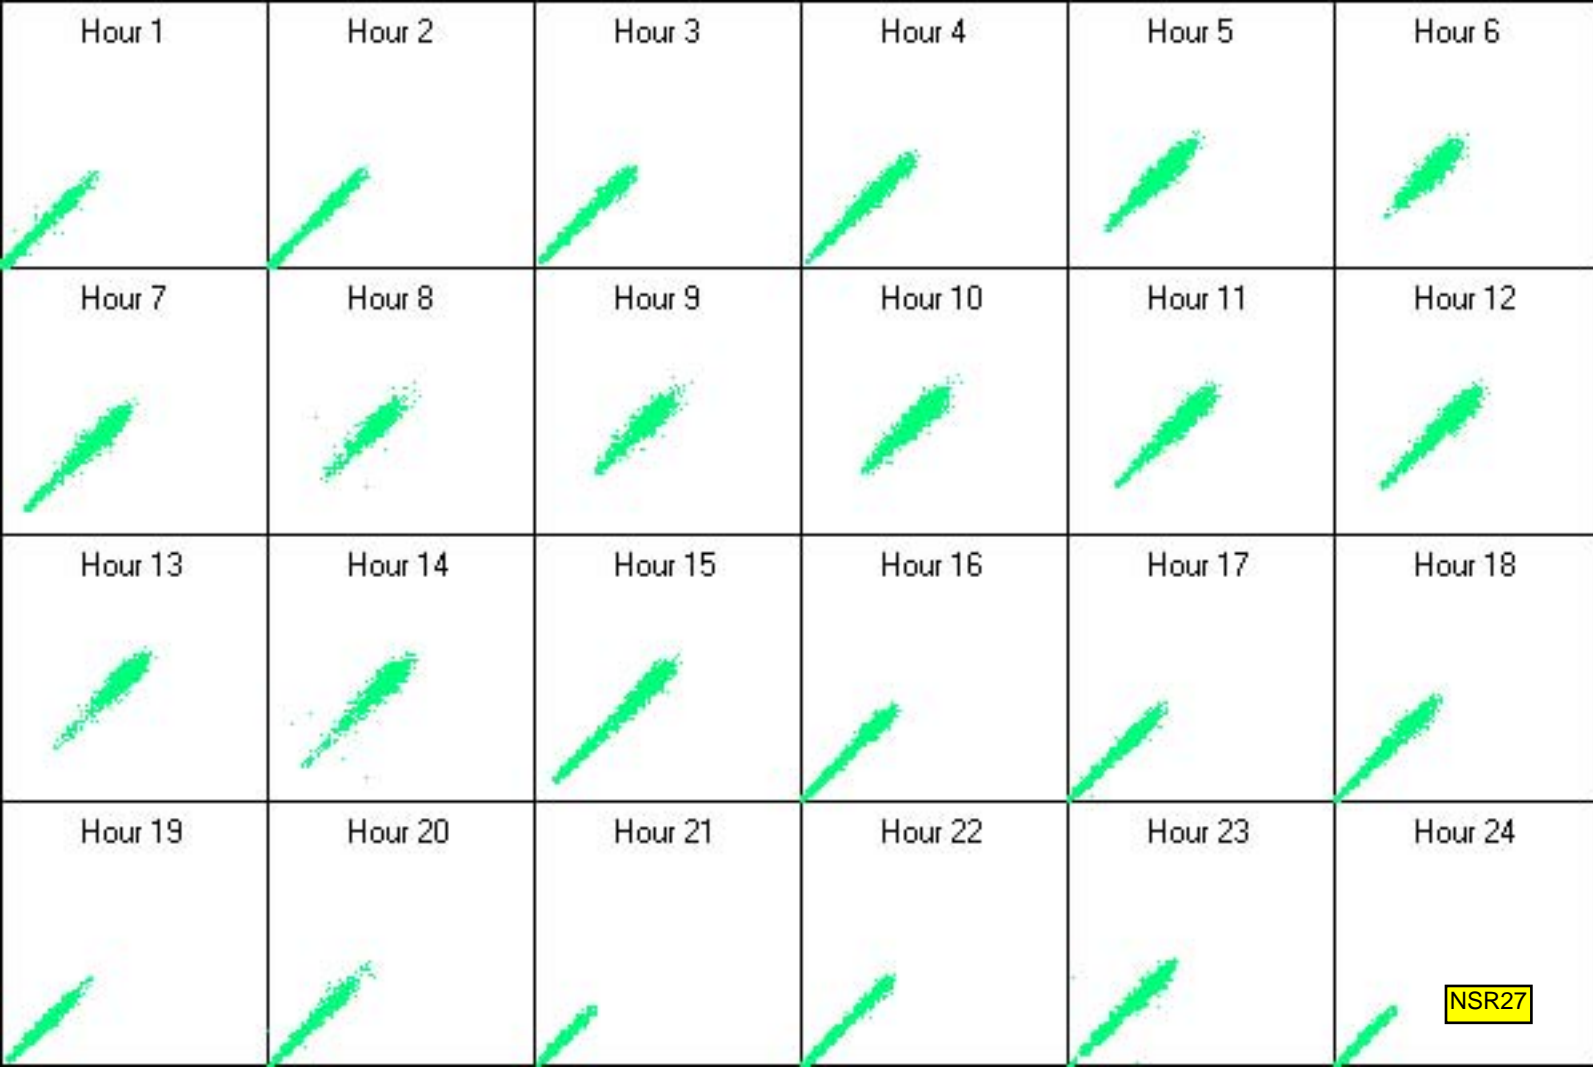

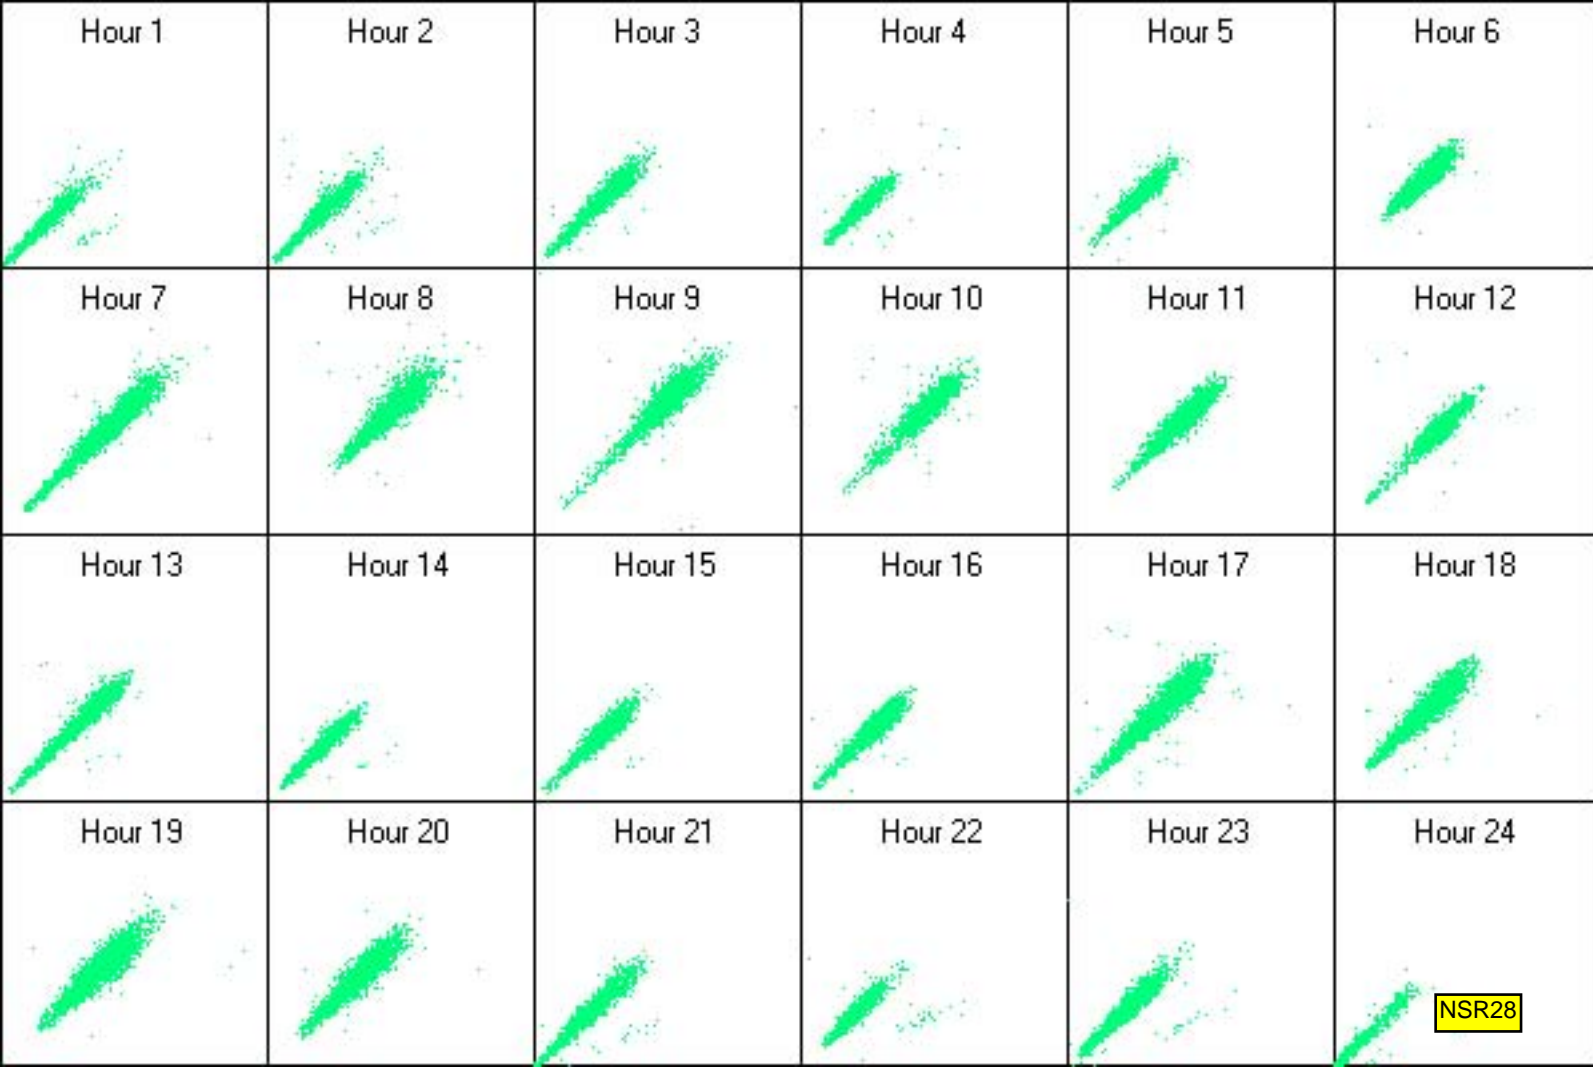

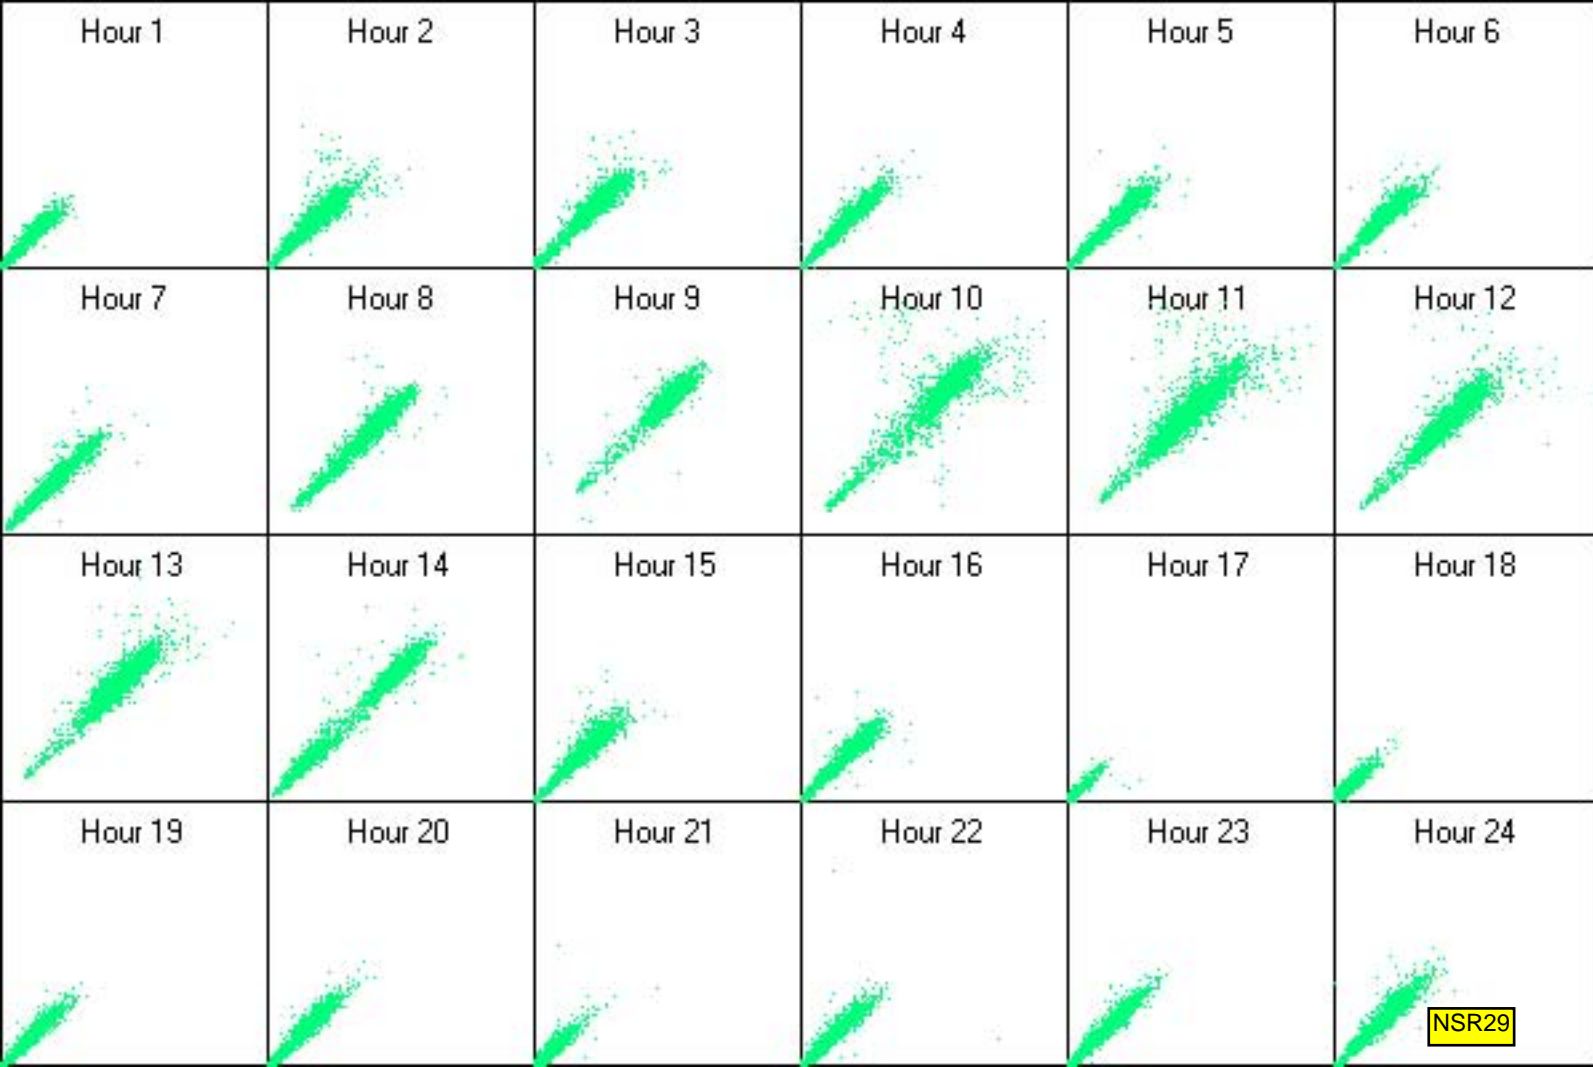

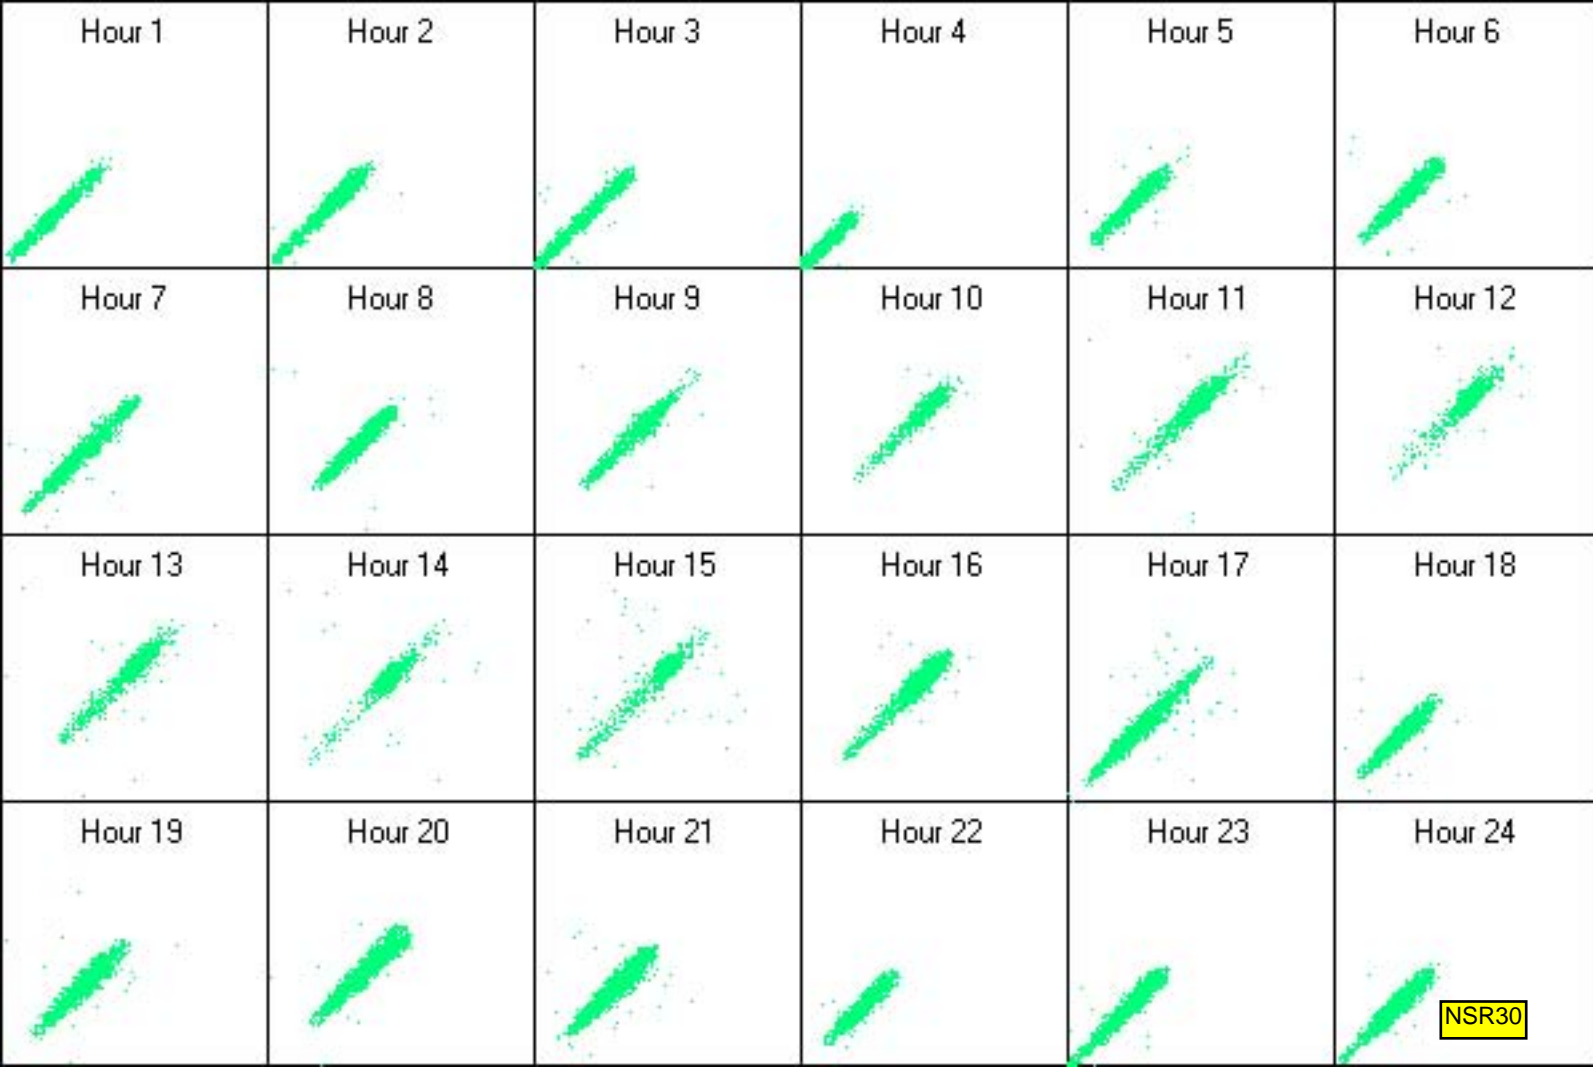

NSR30

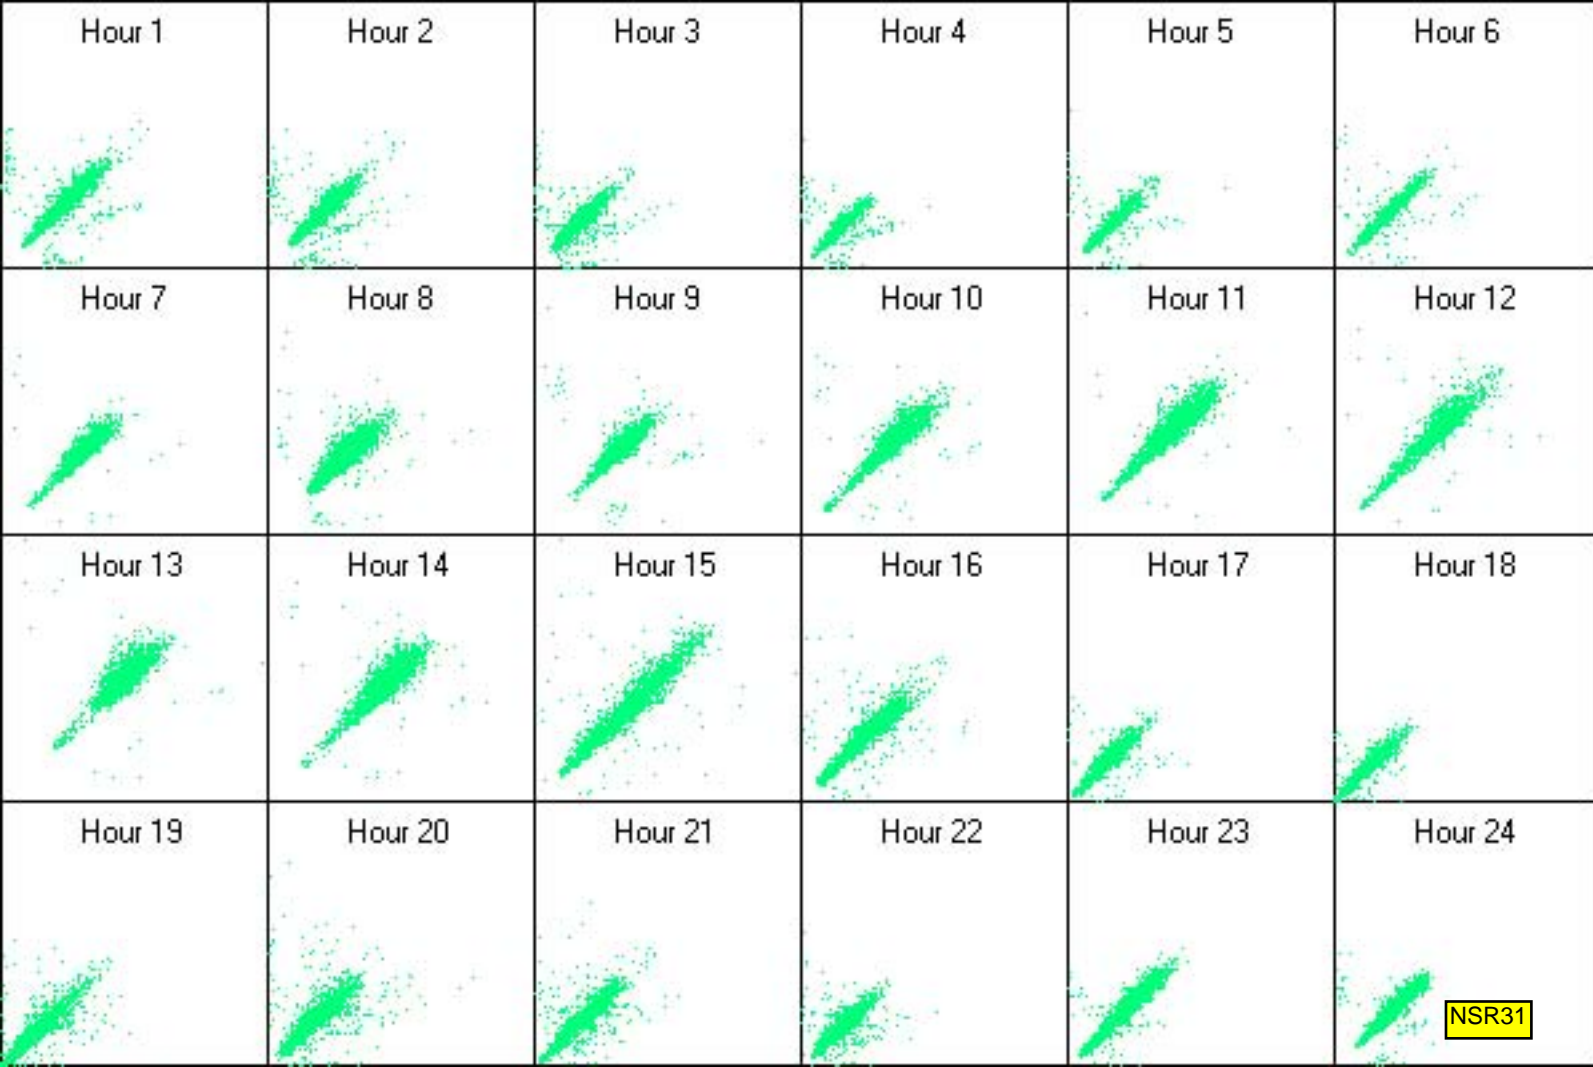



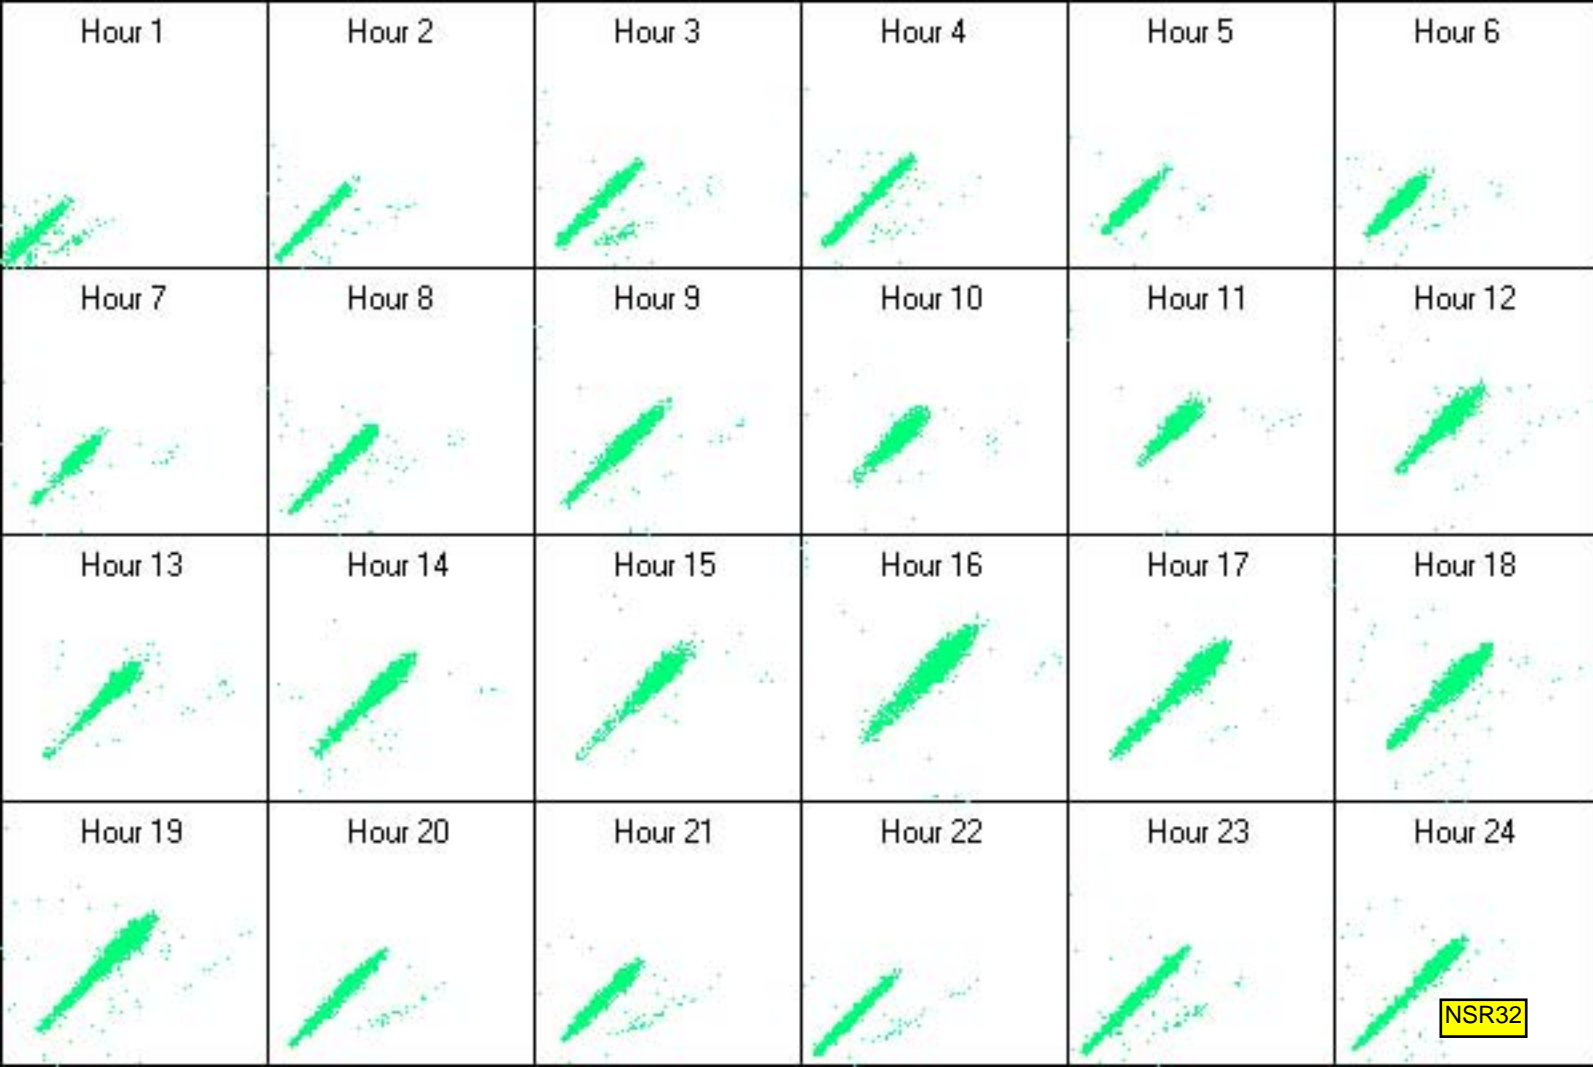

NSR32

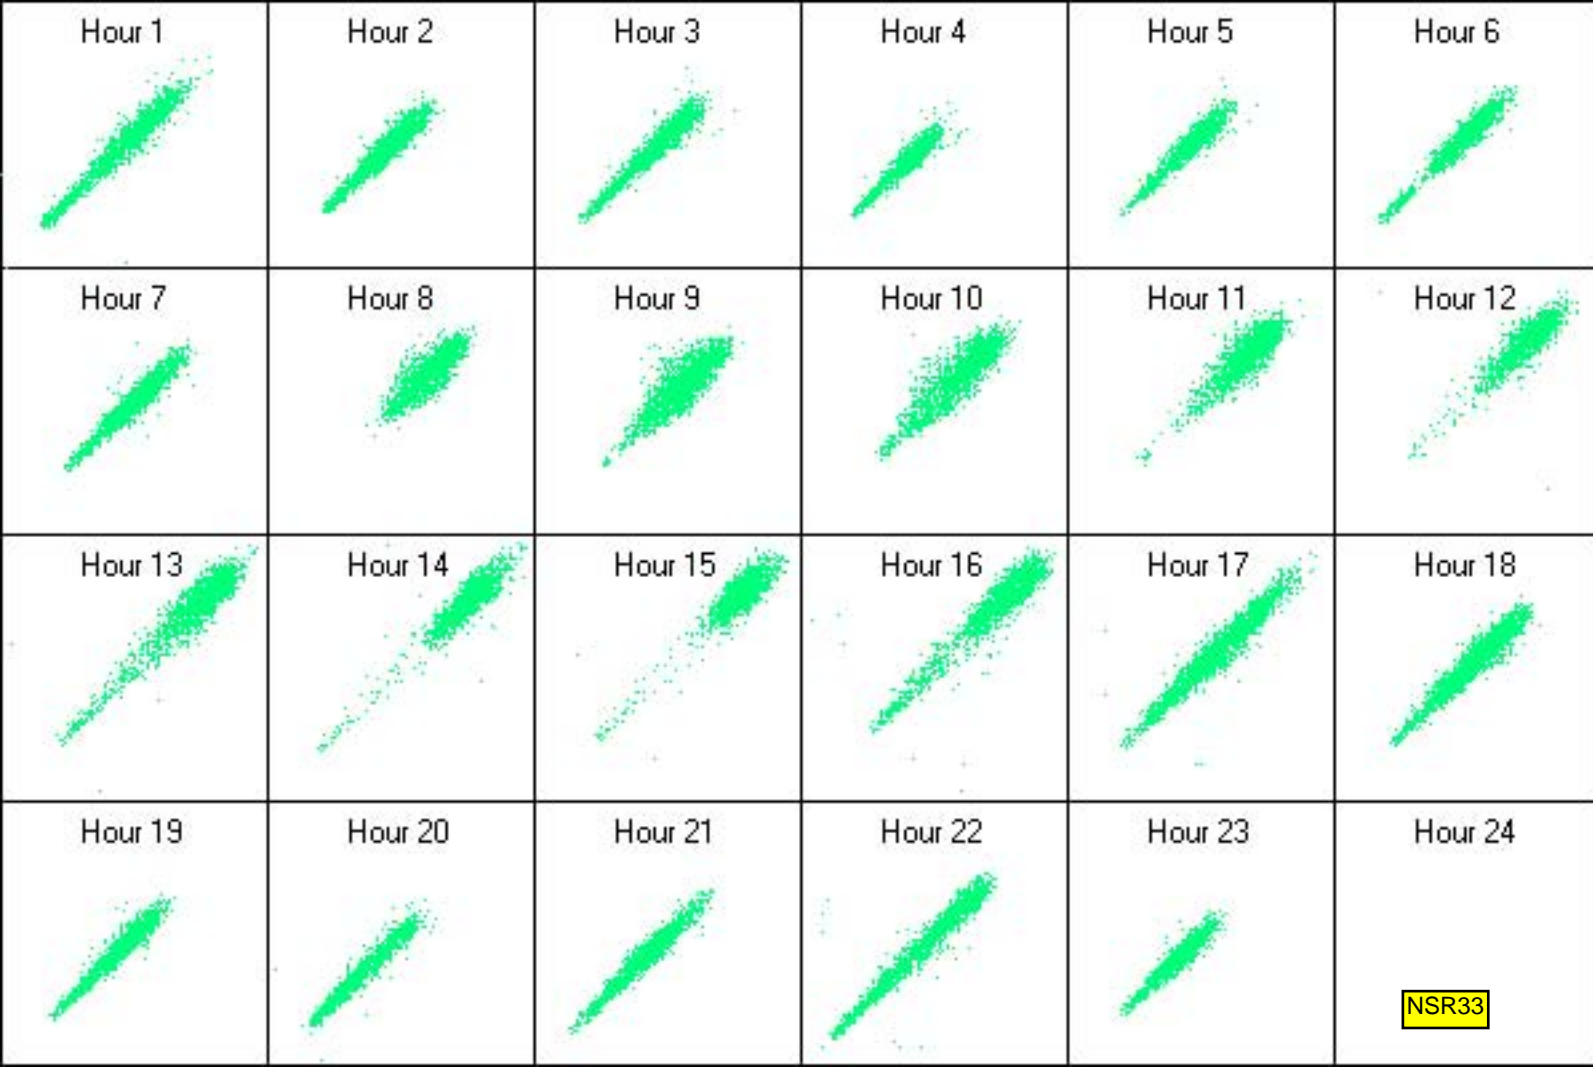

NSR33

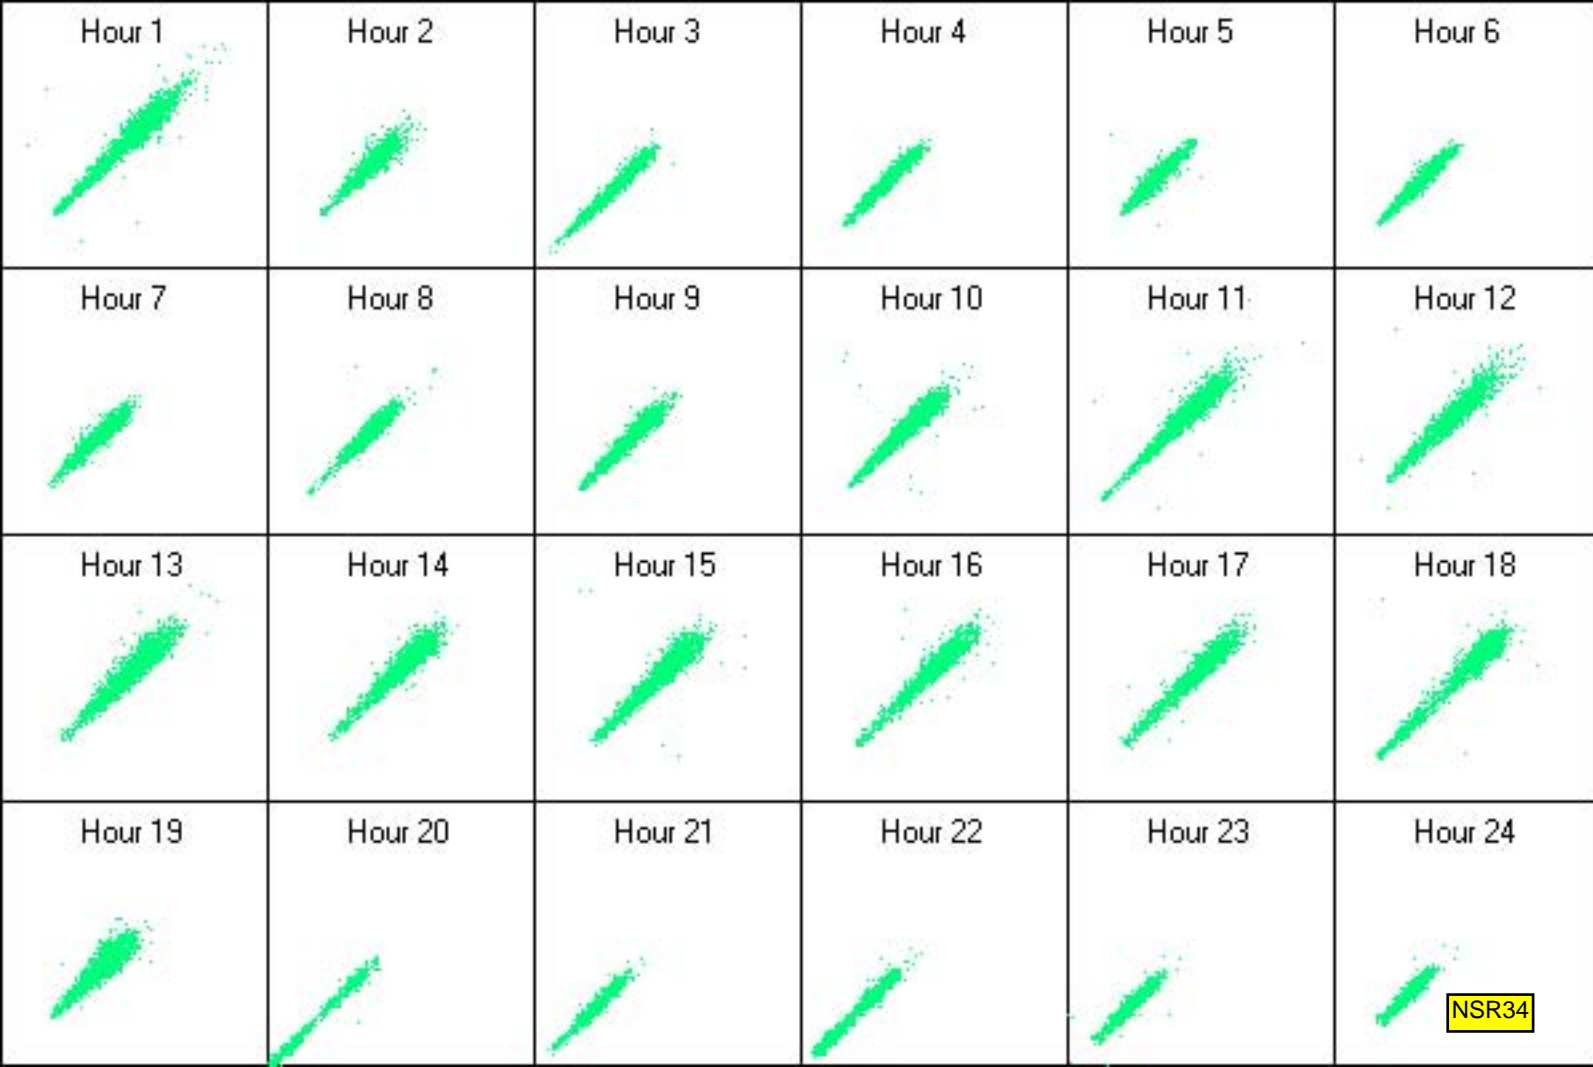

NSR34

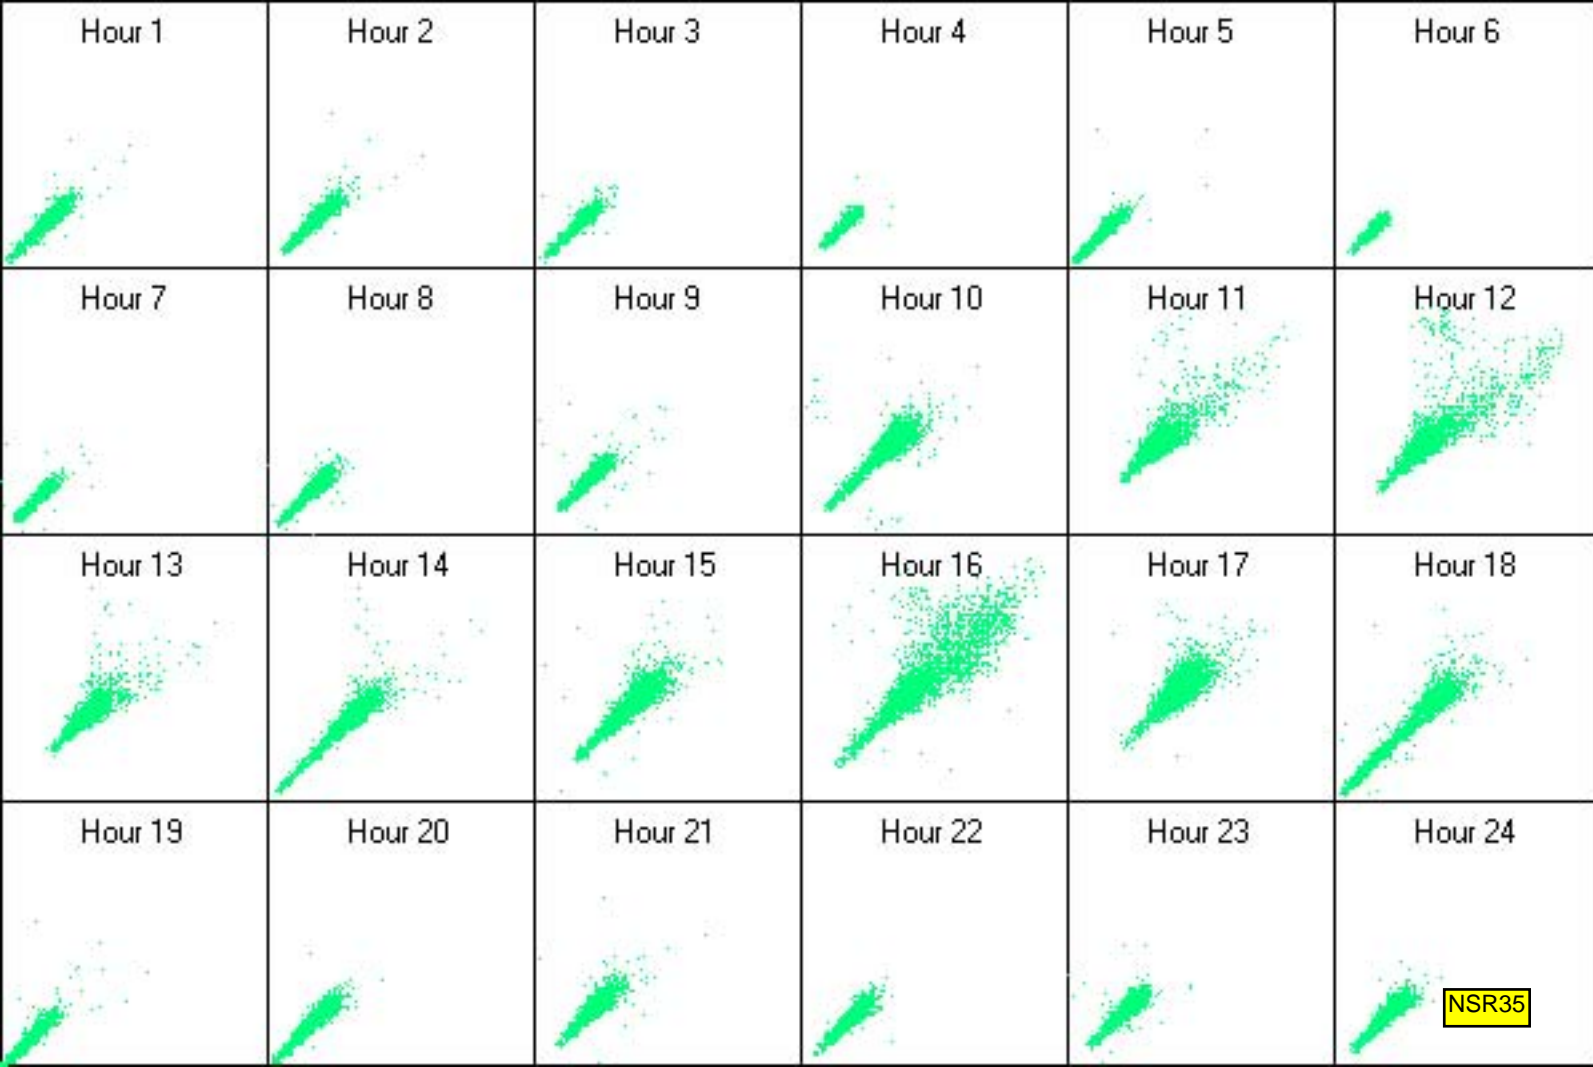

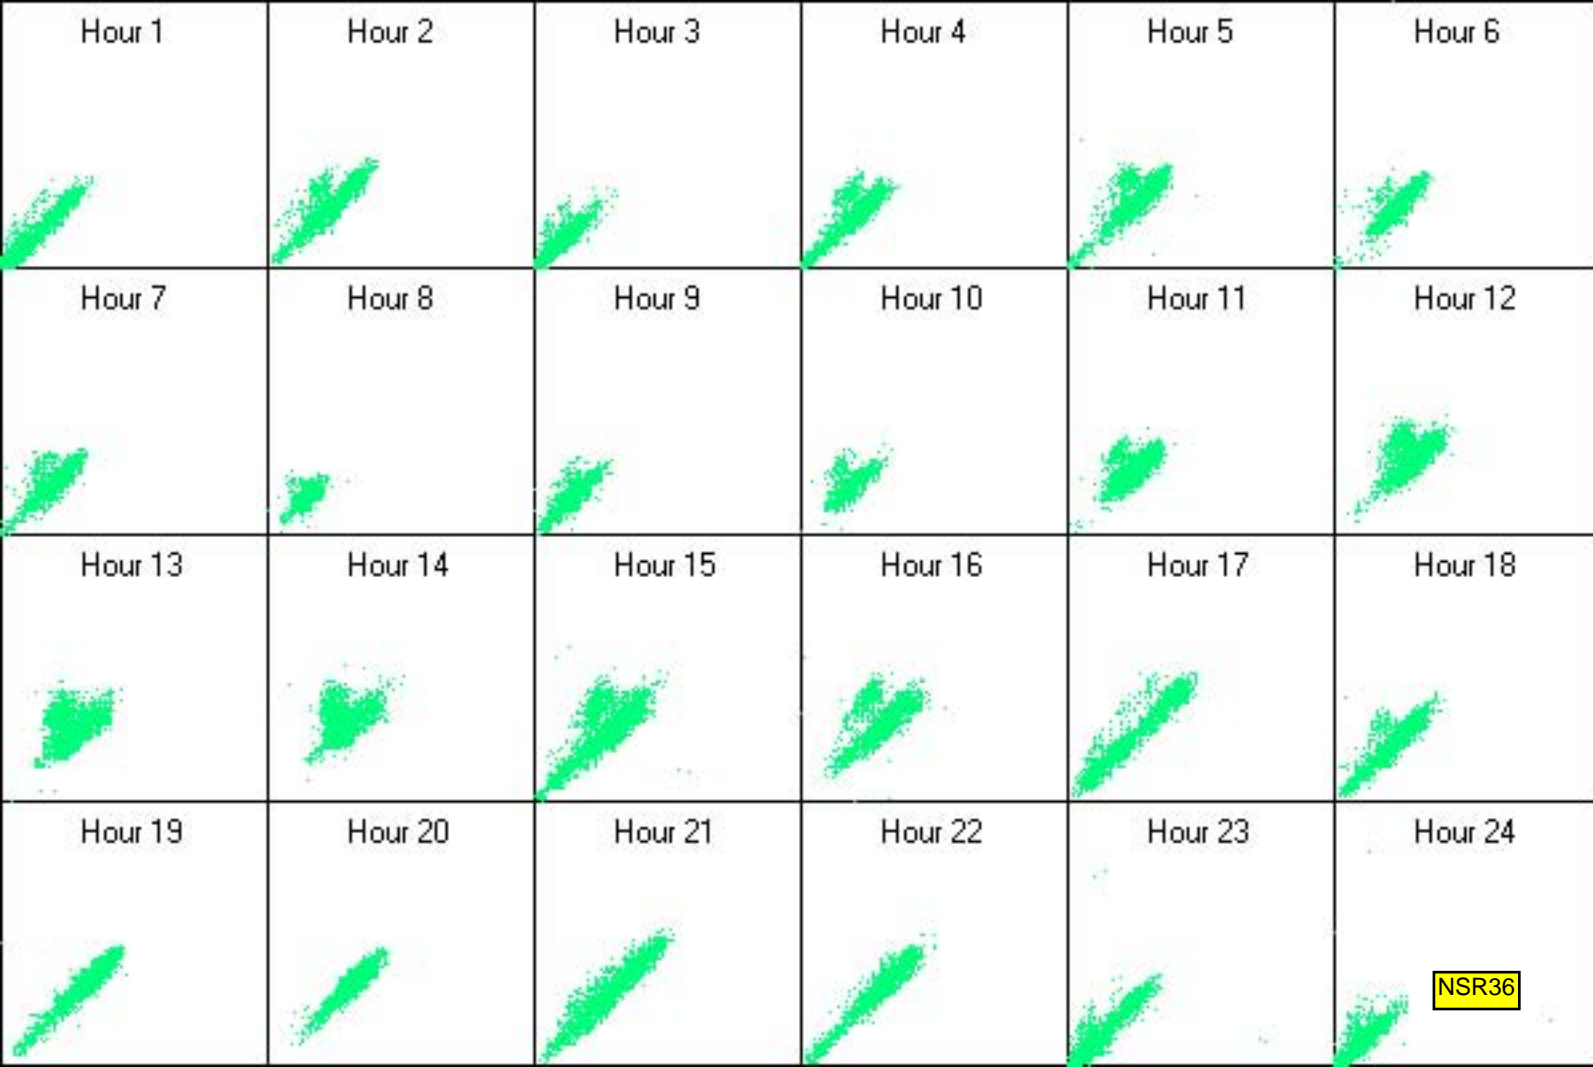

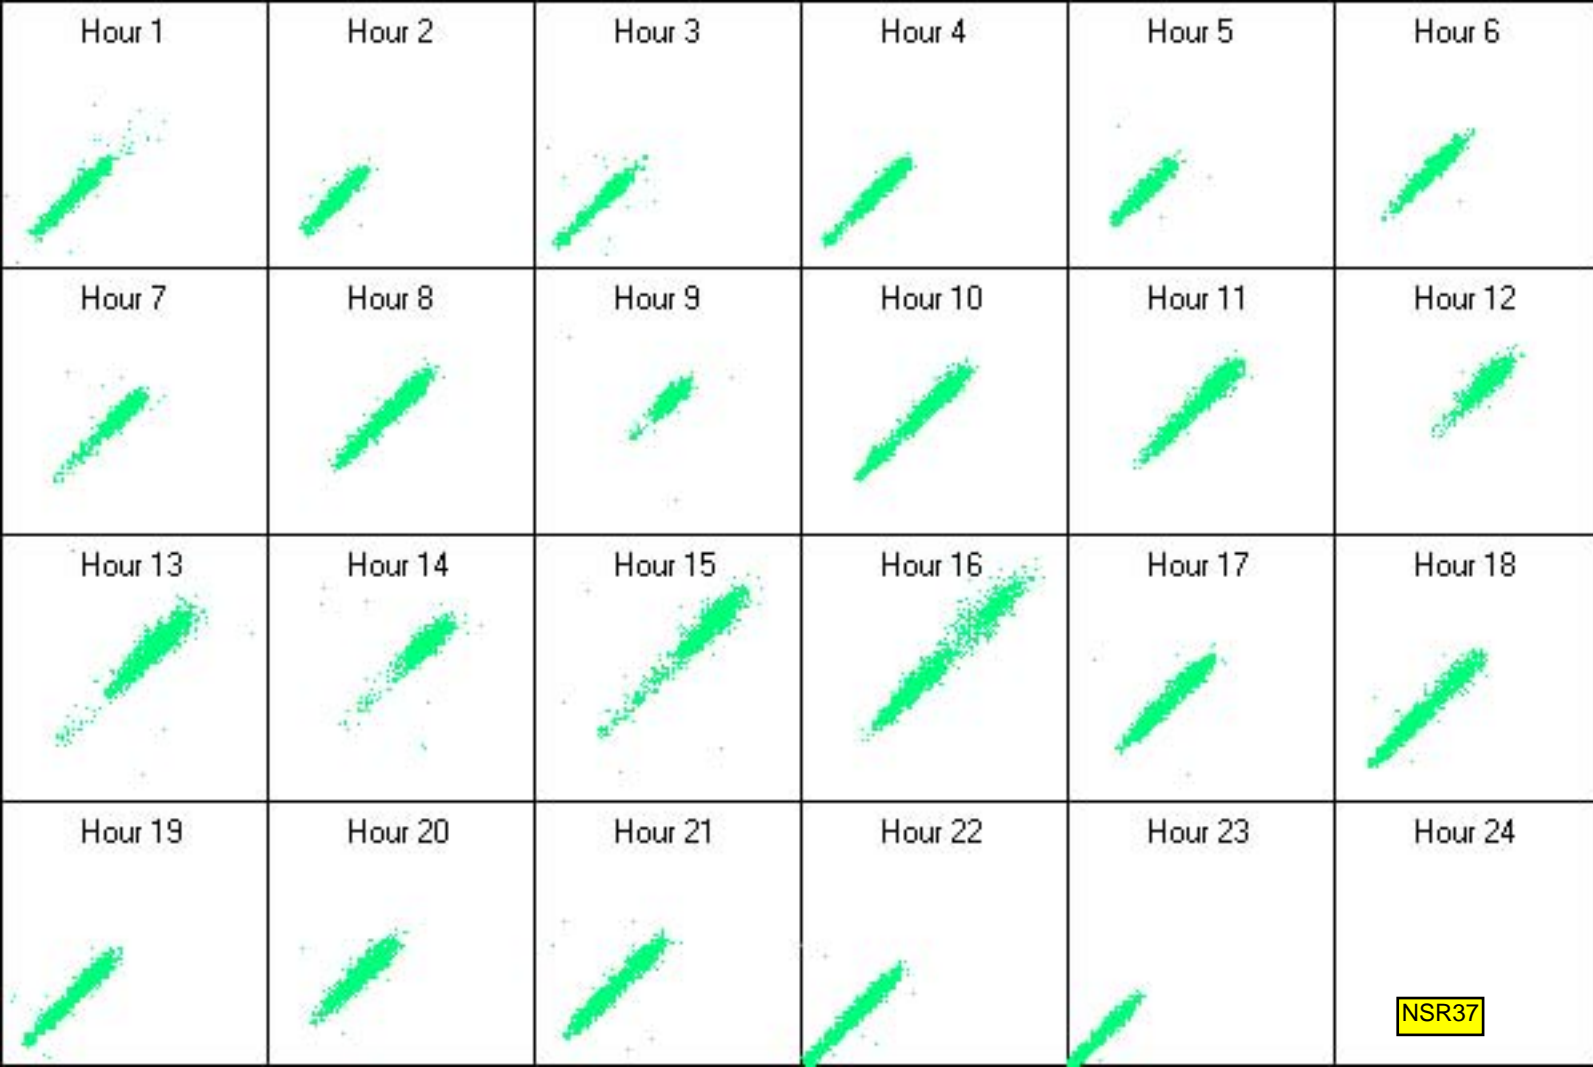

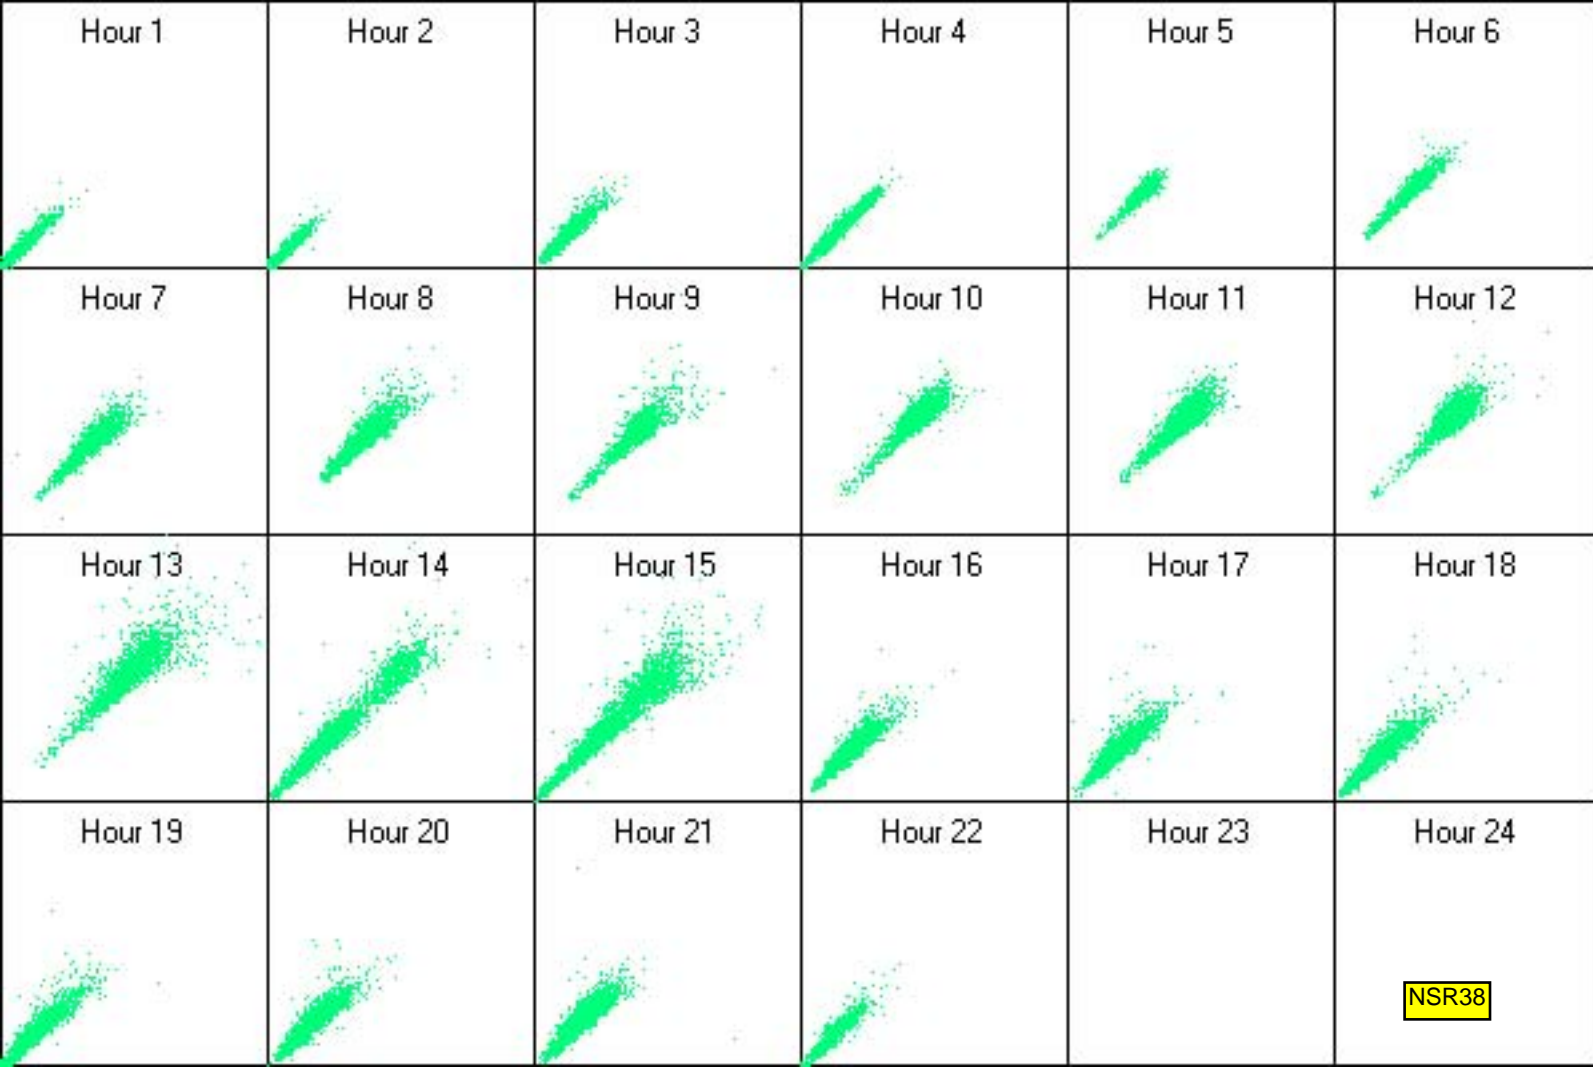

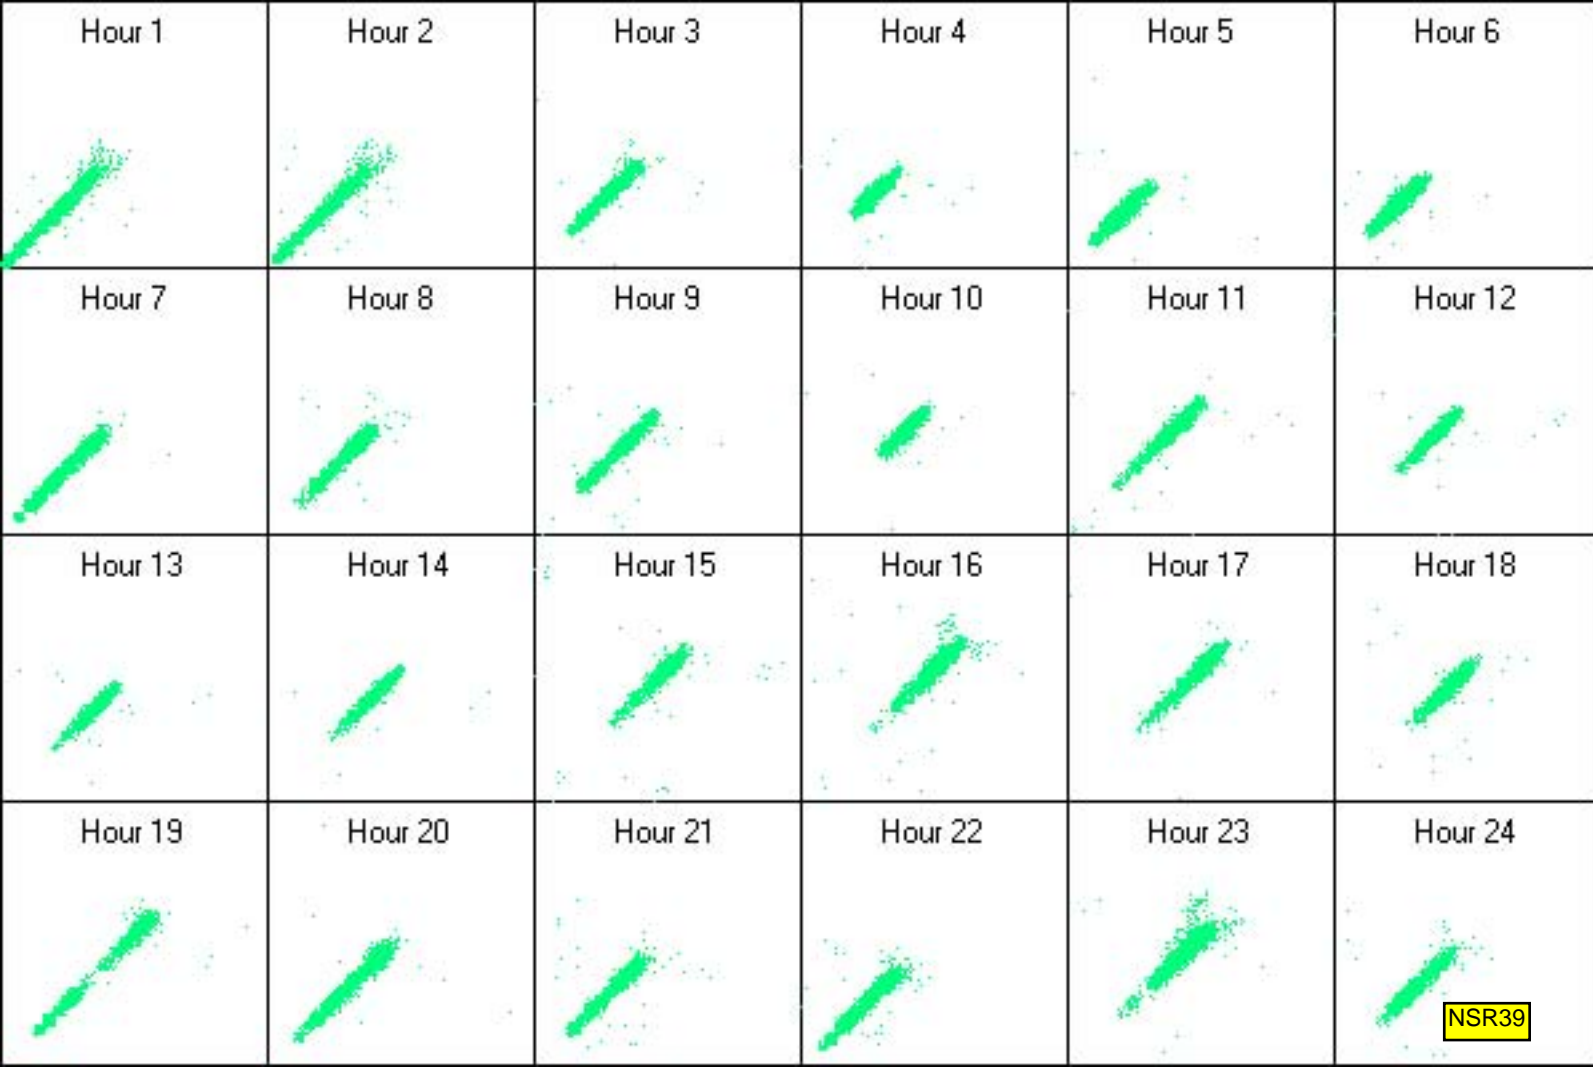



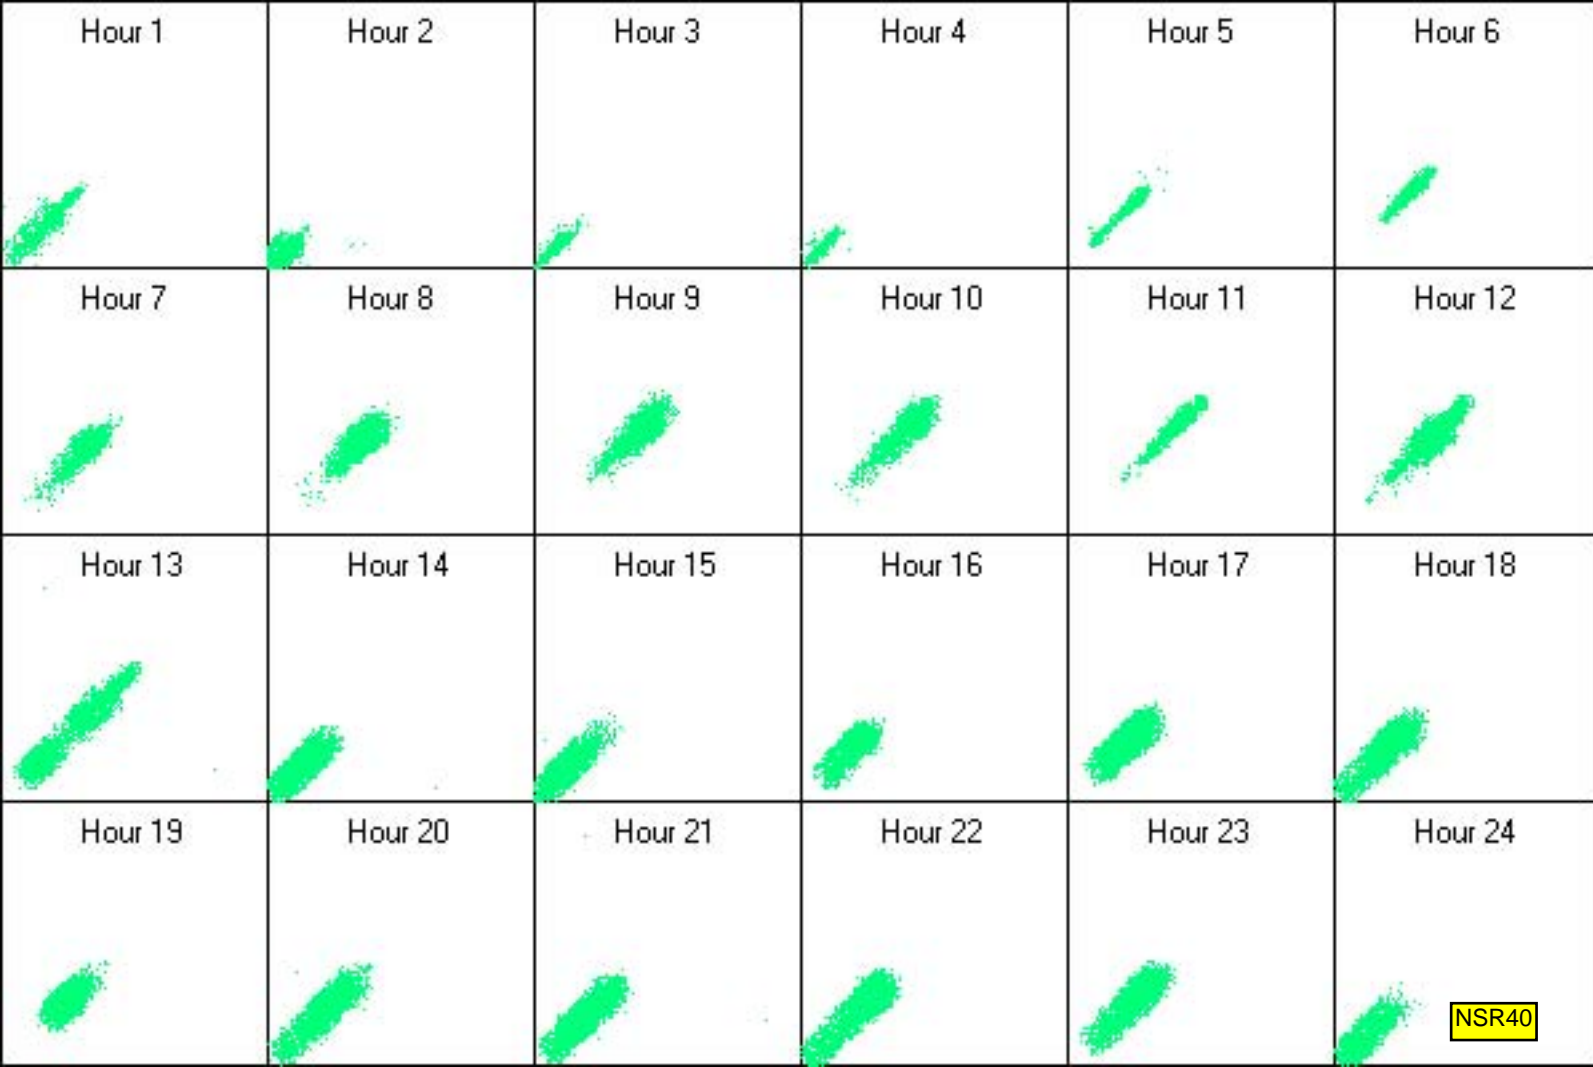

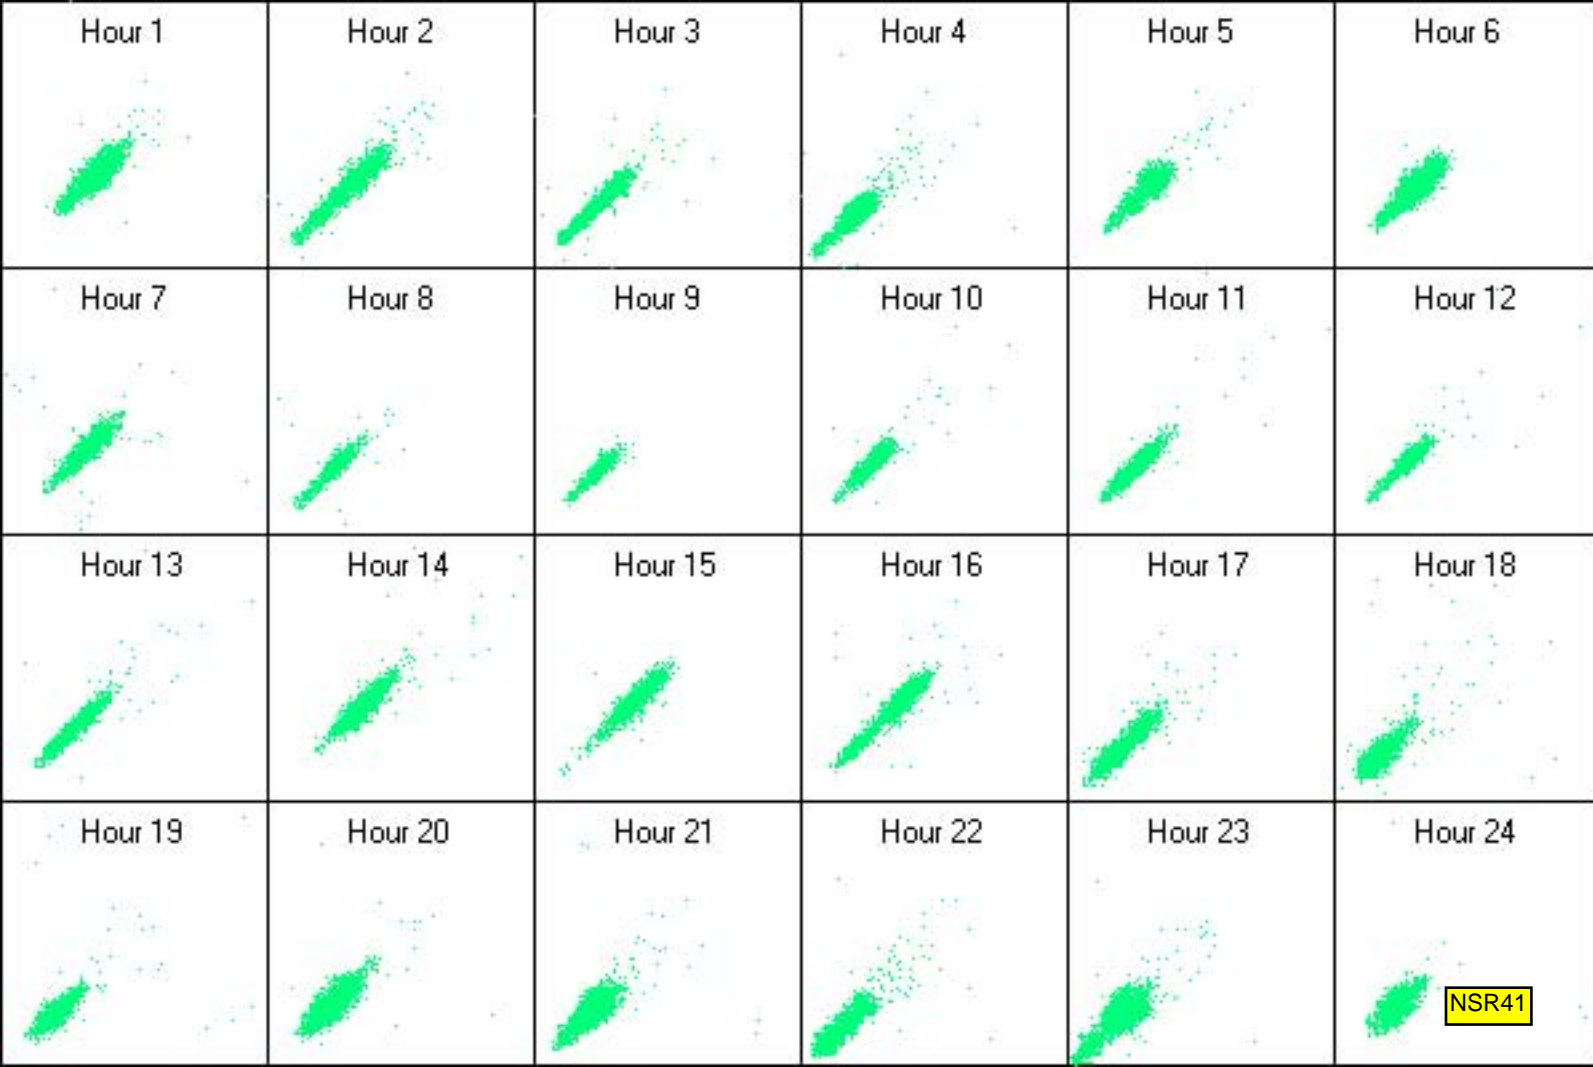

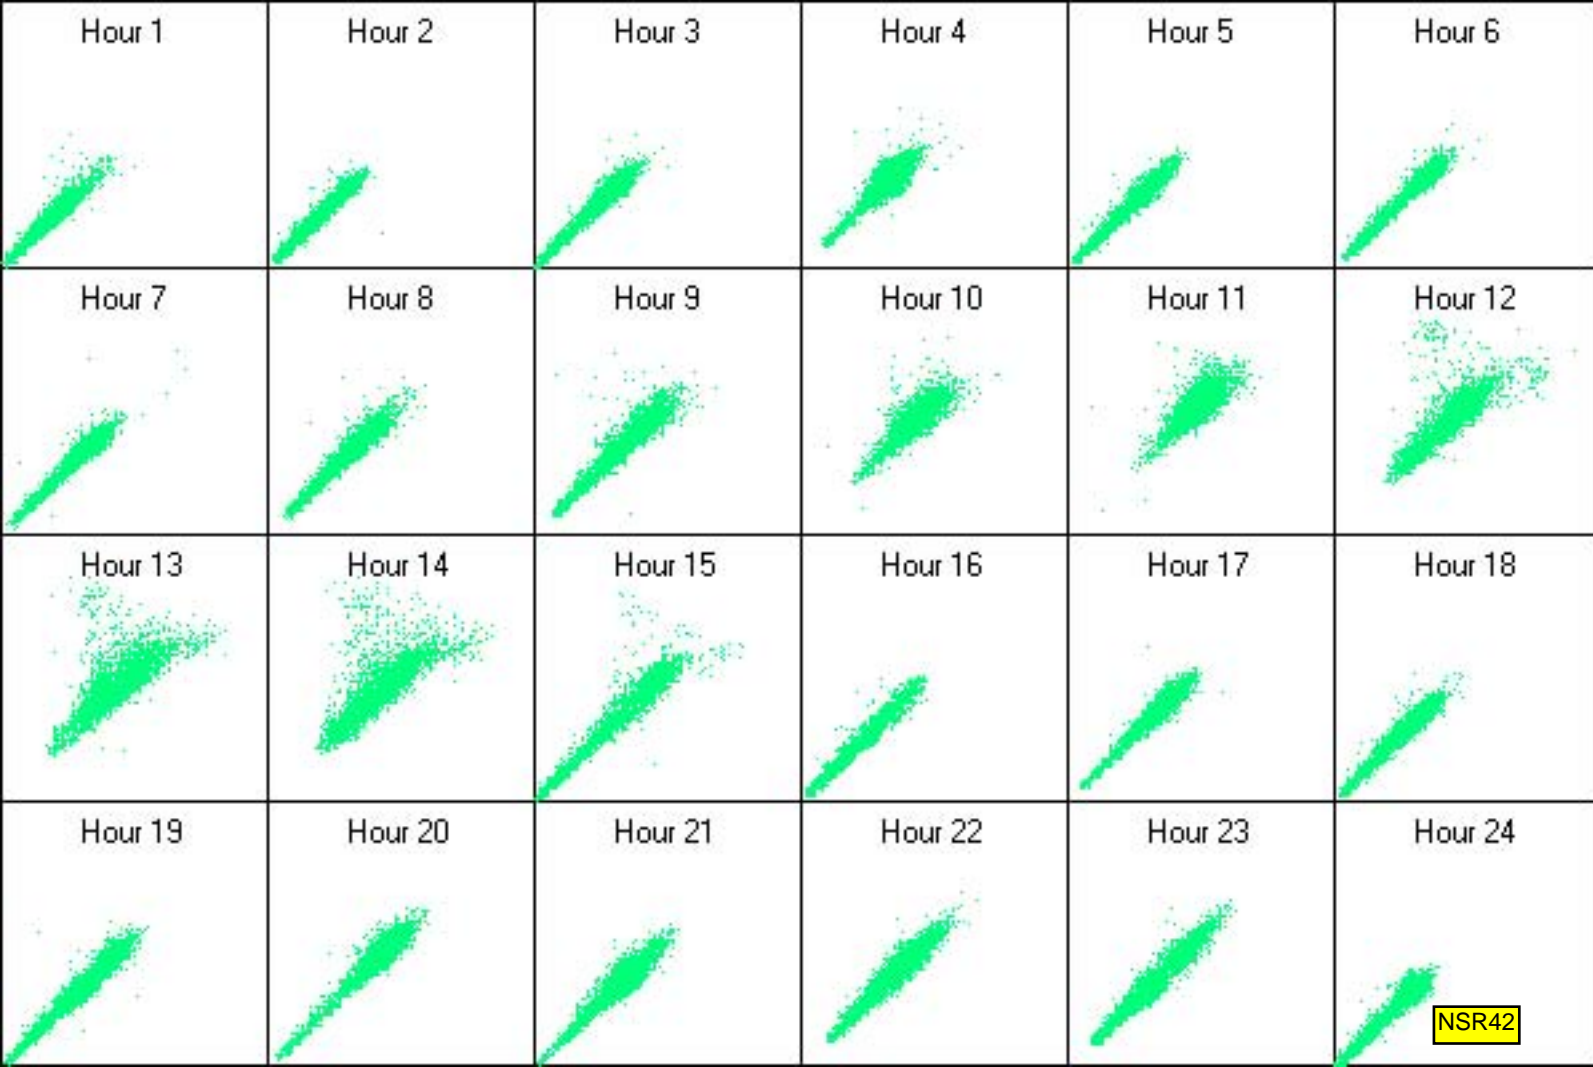

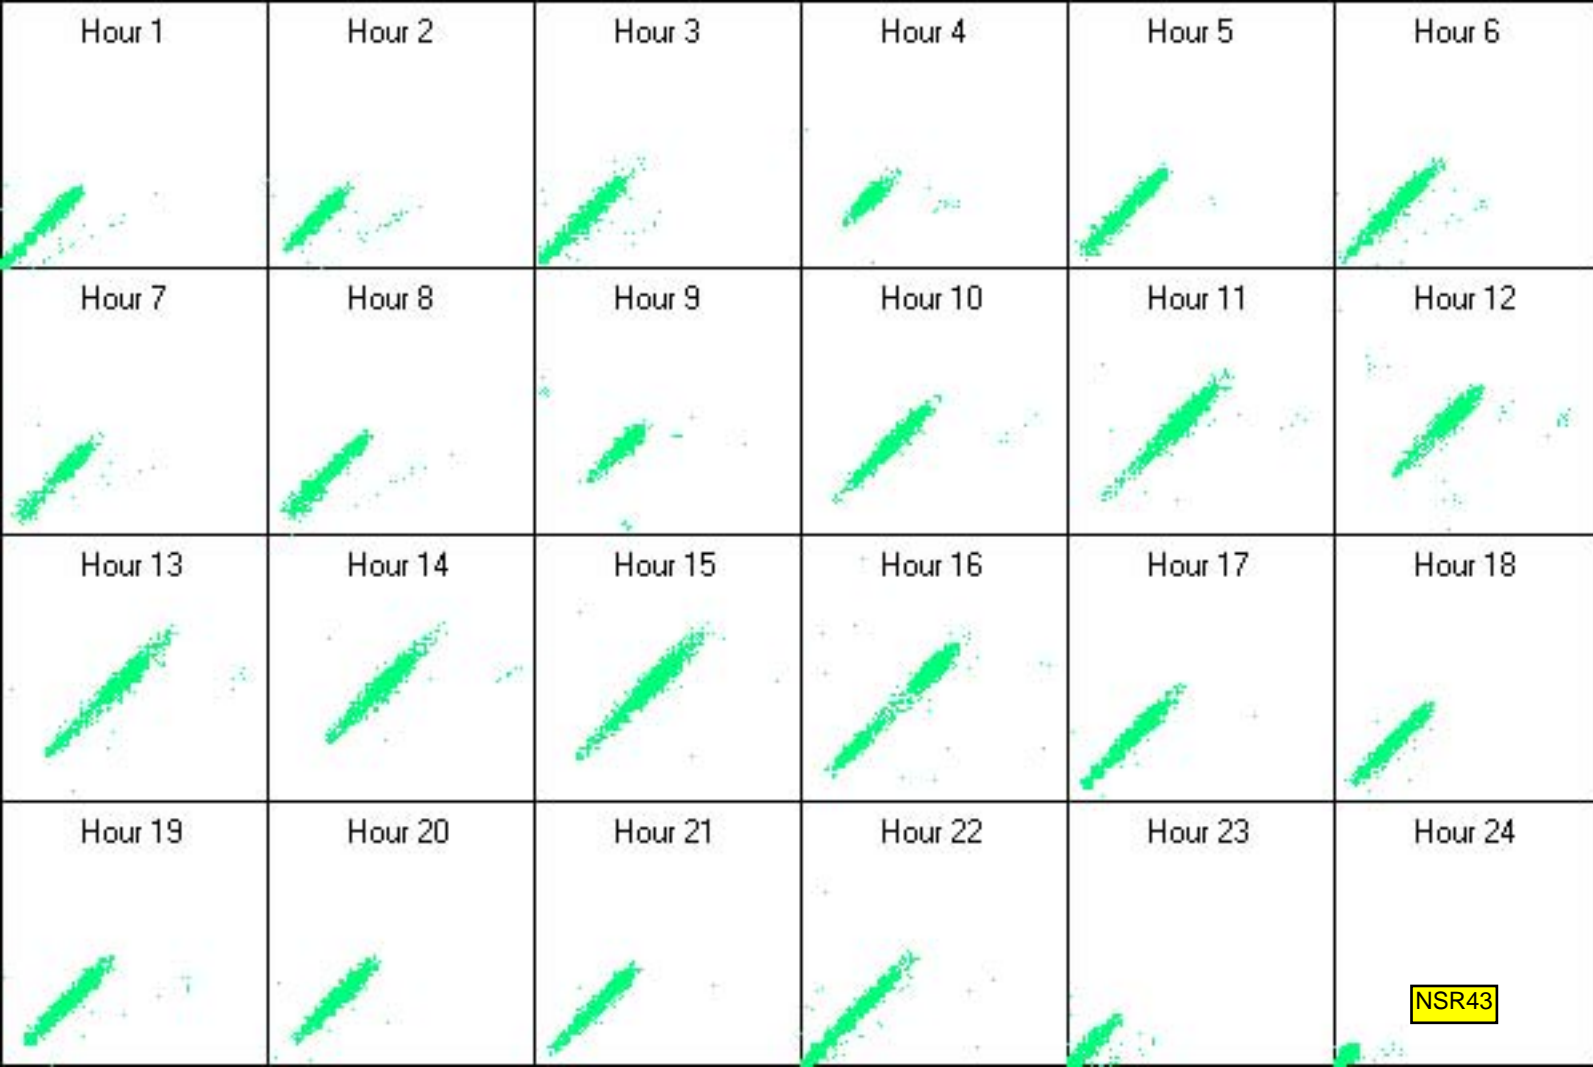

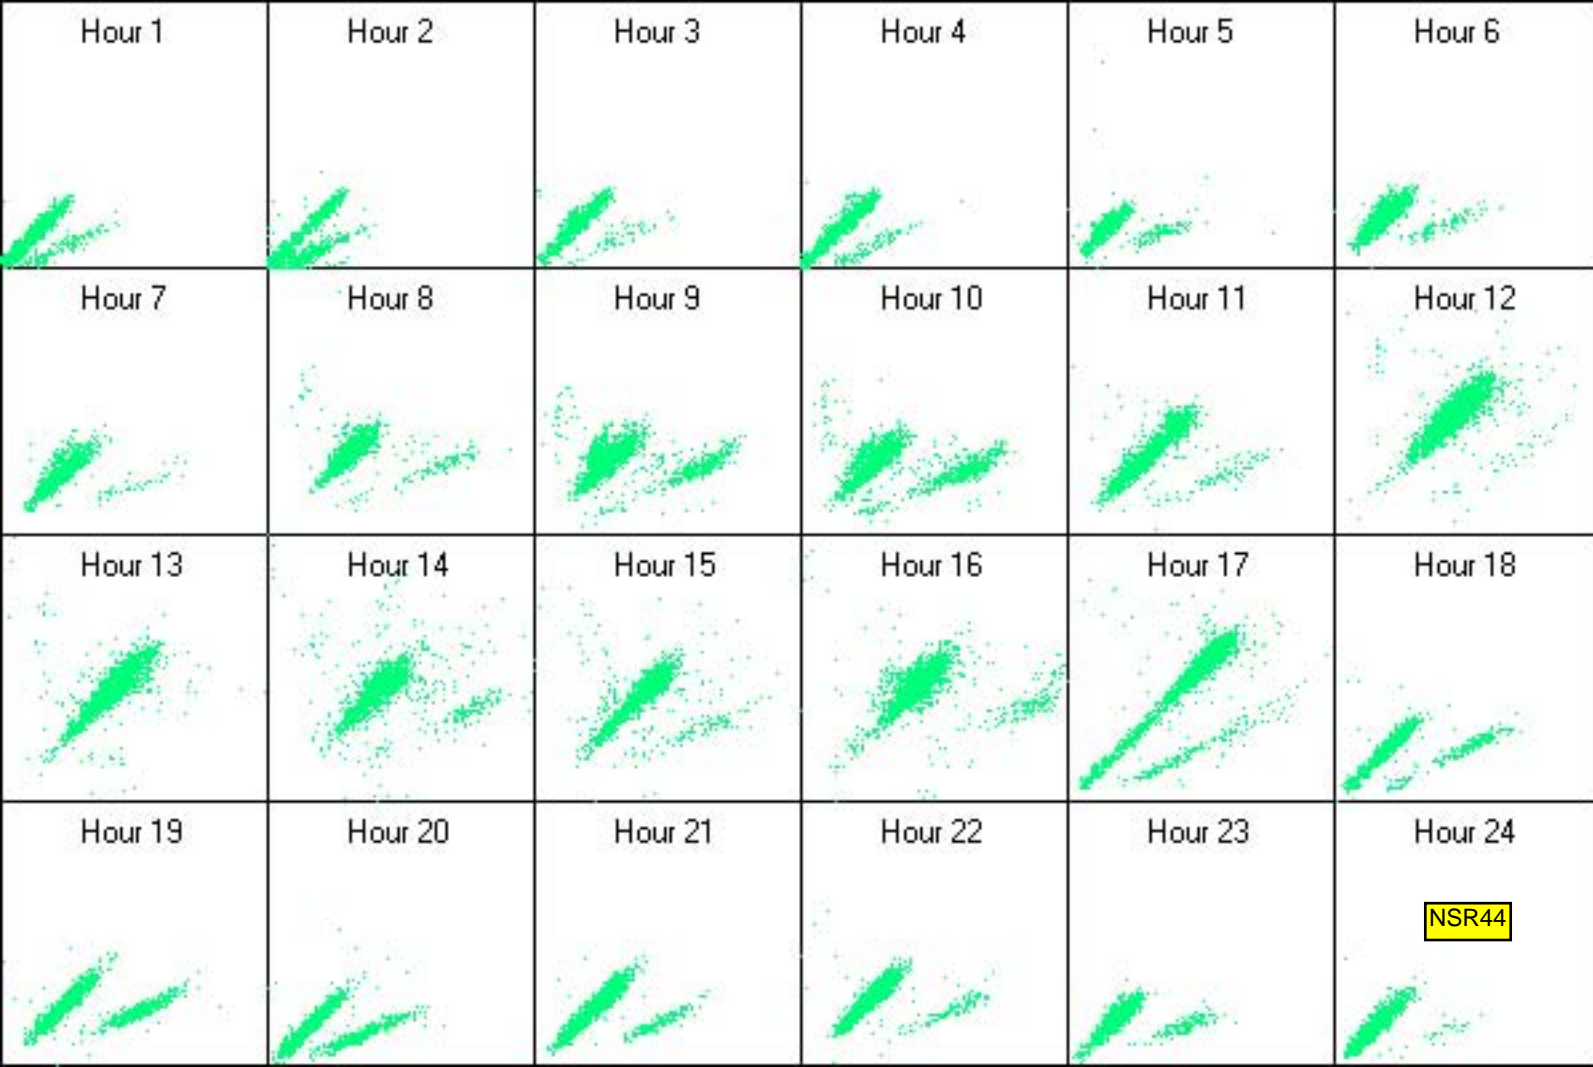

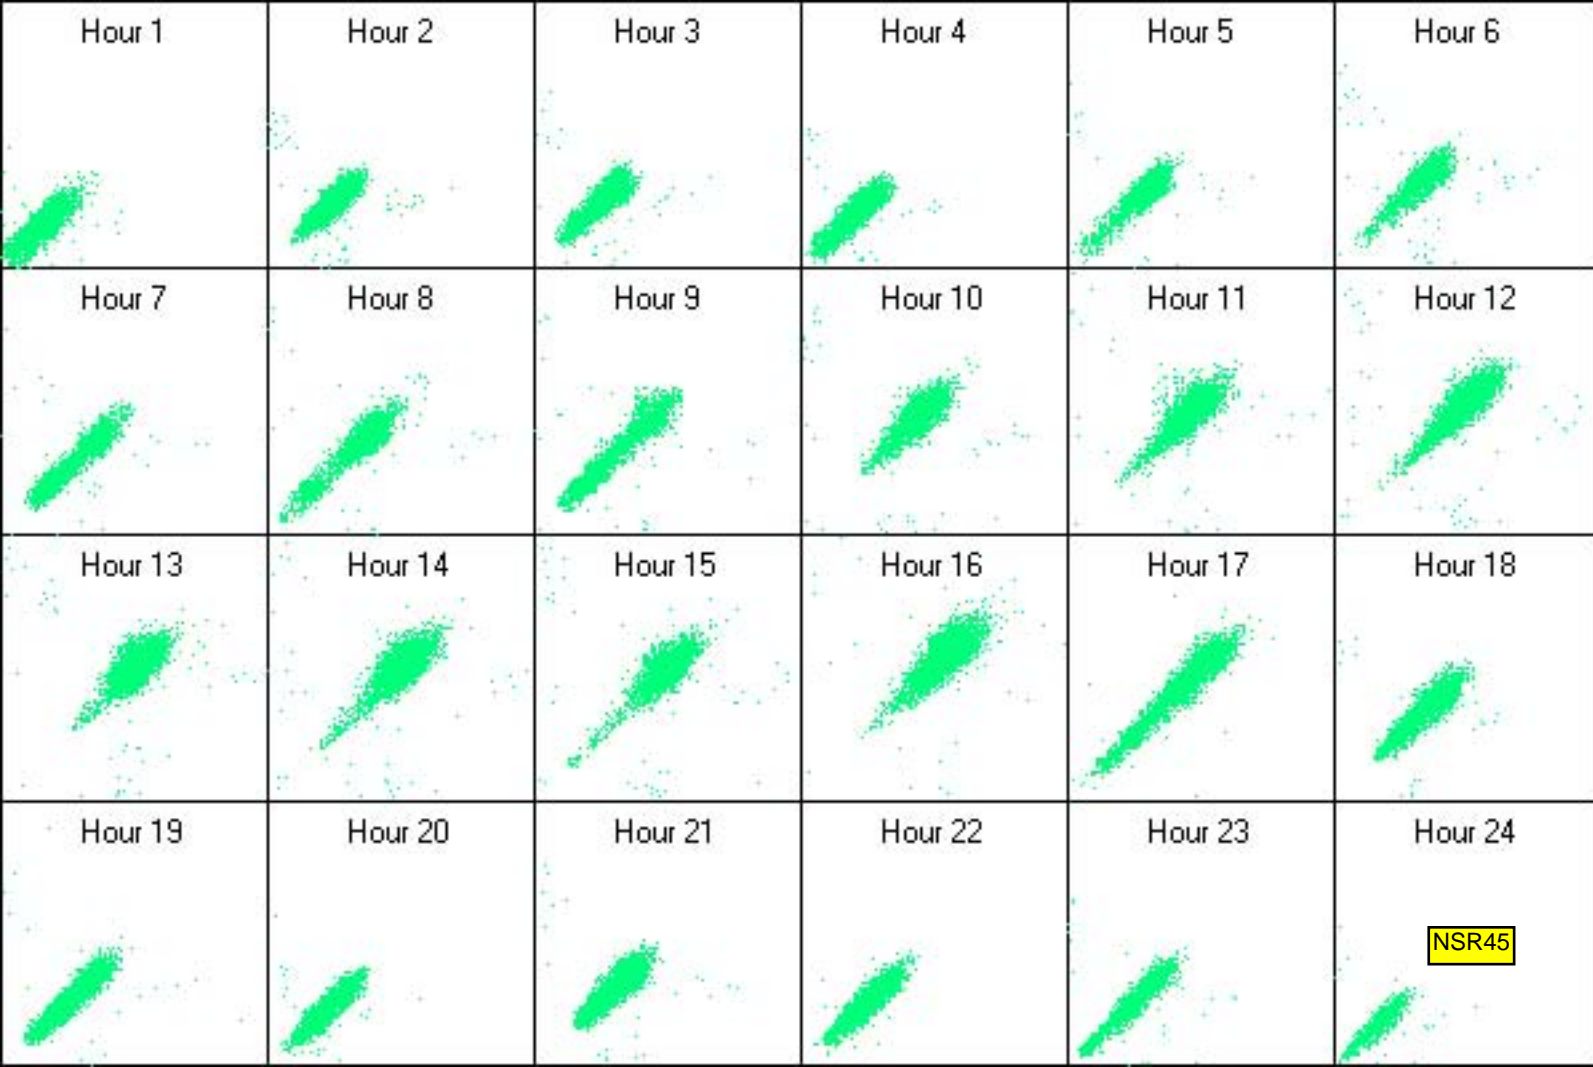

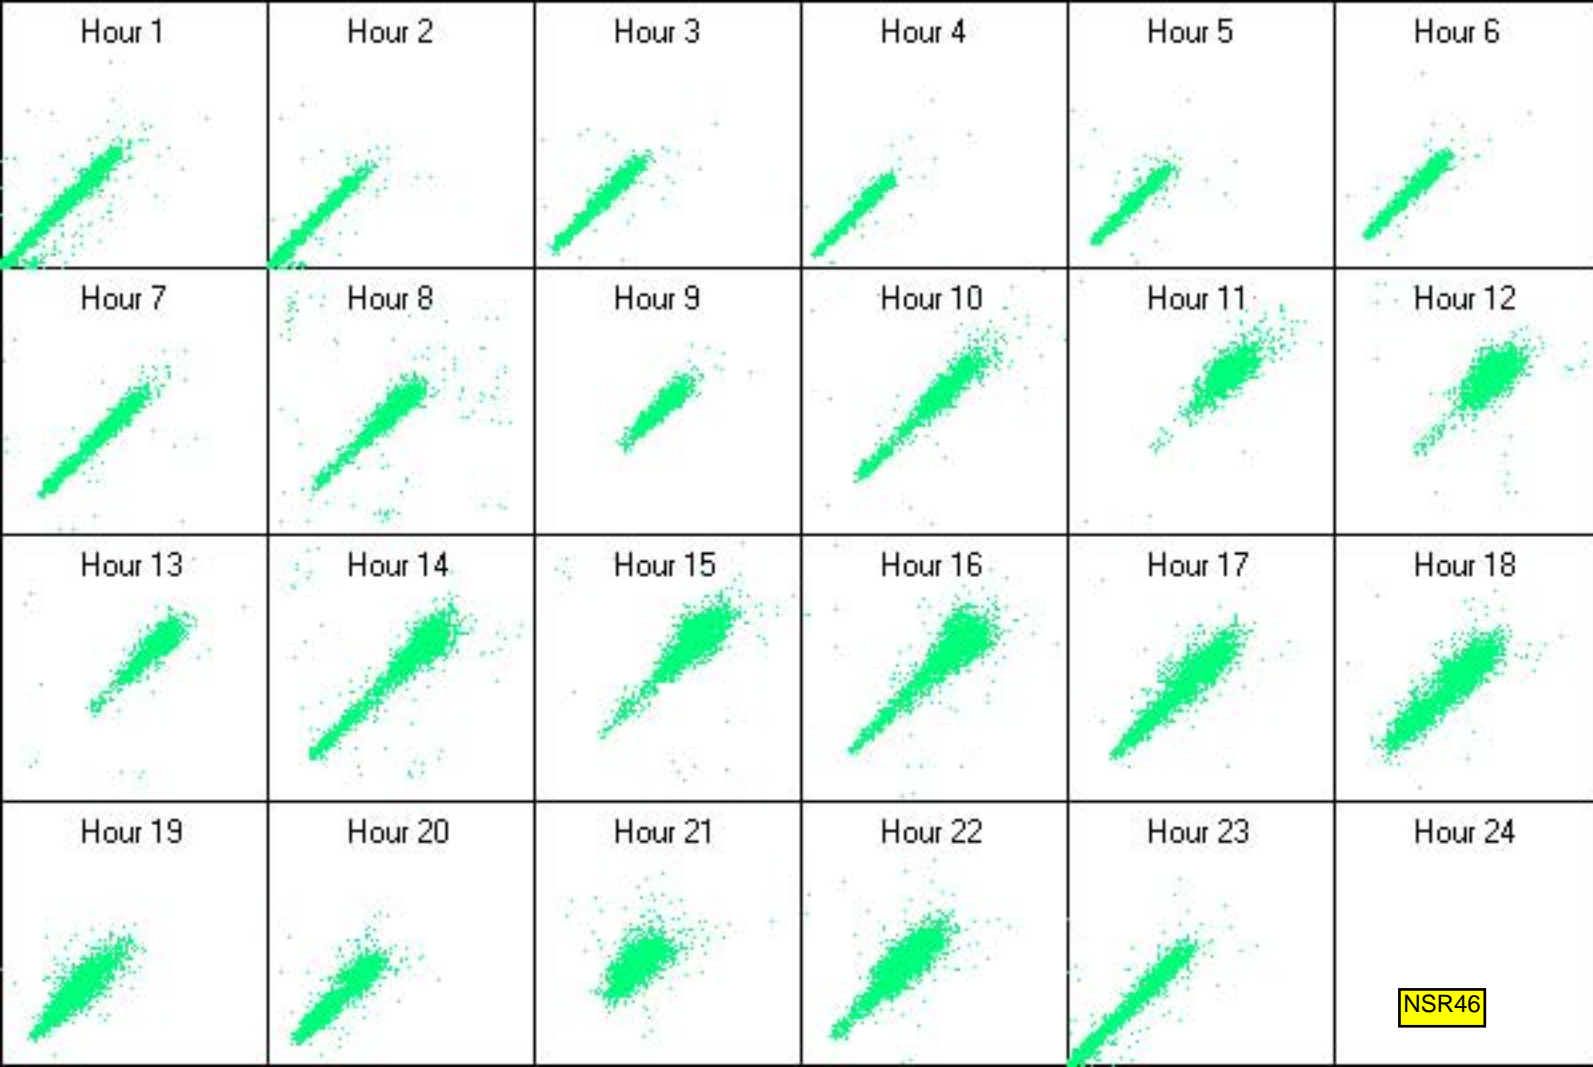

NSR46

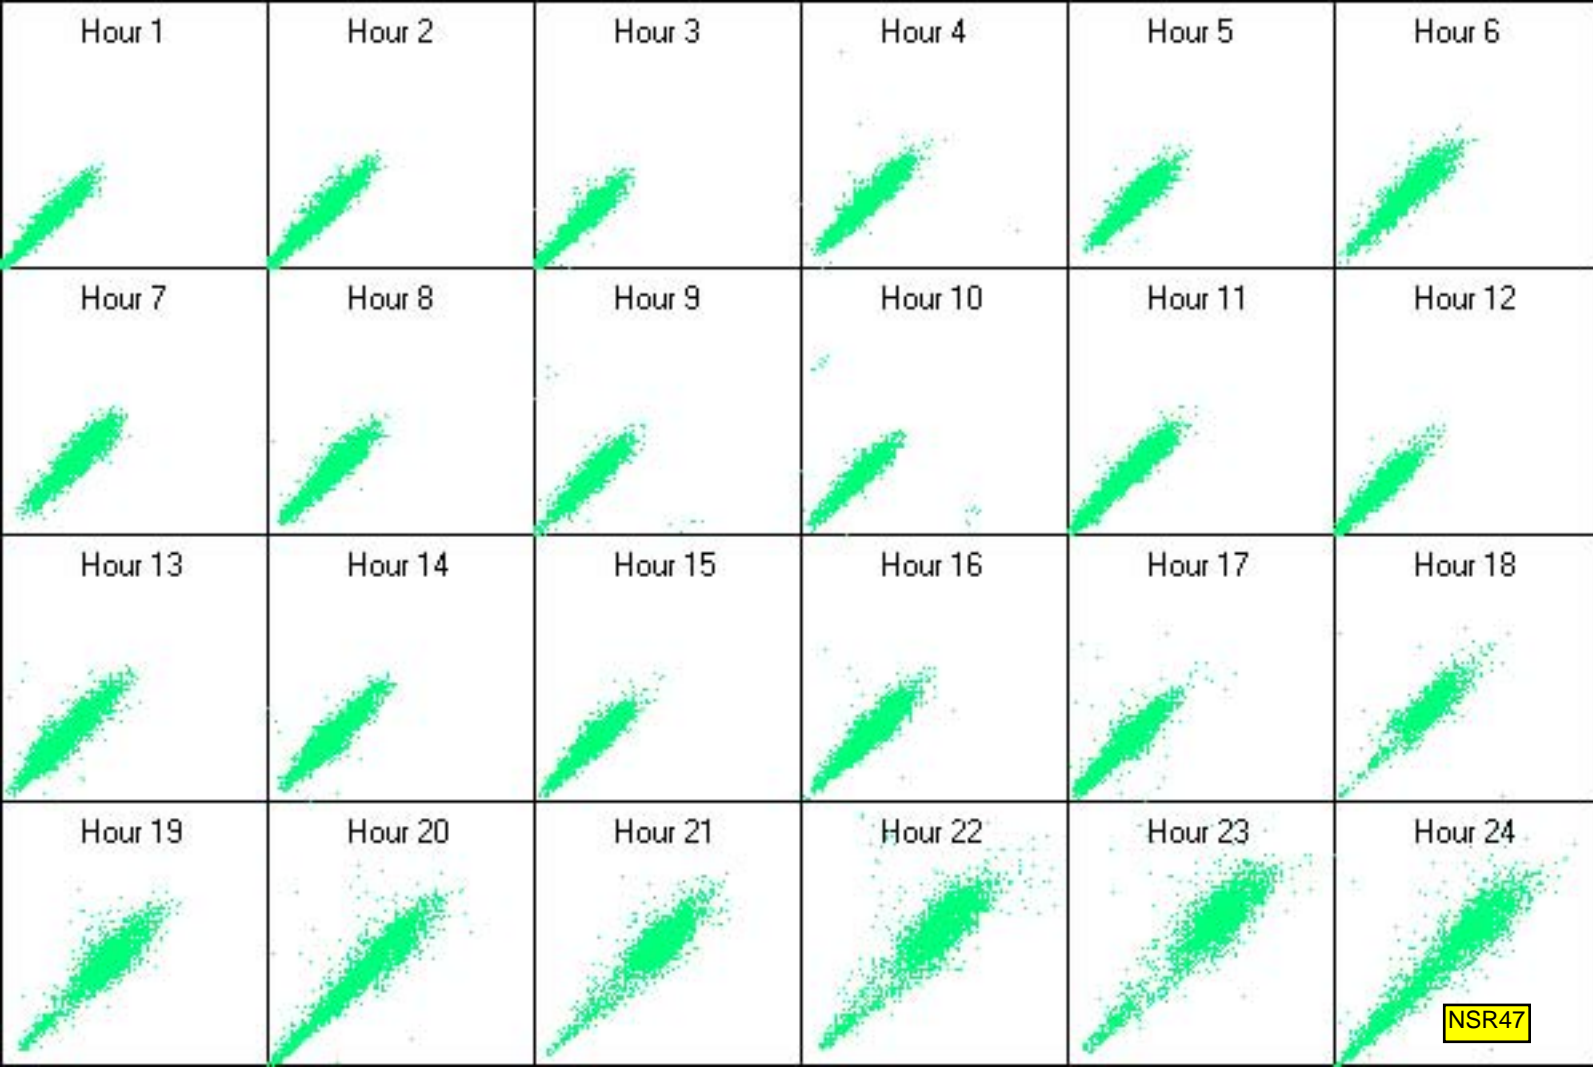



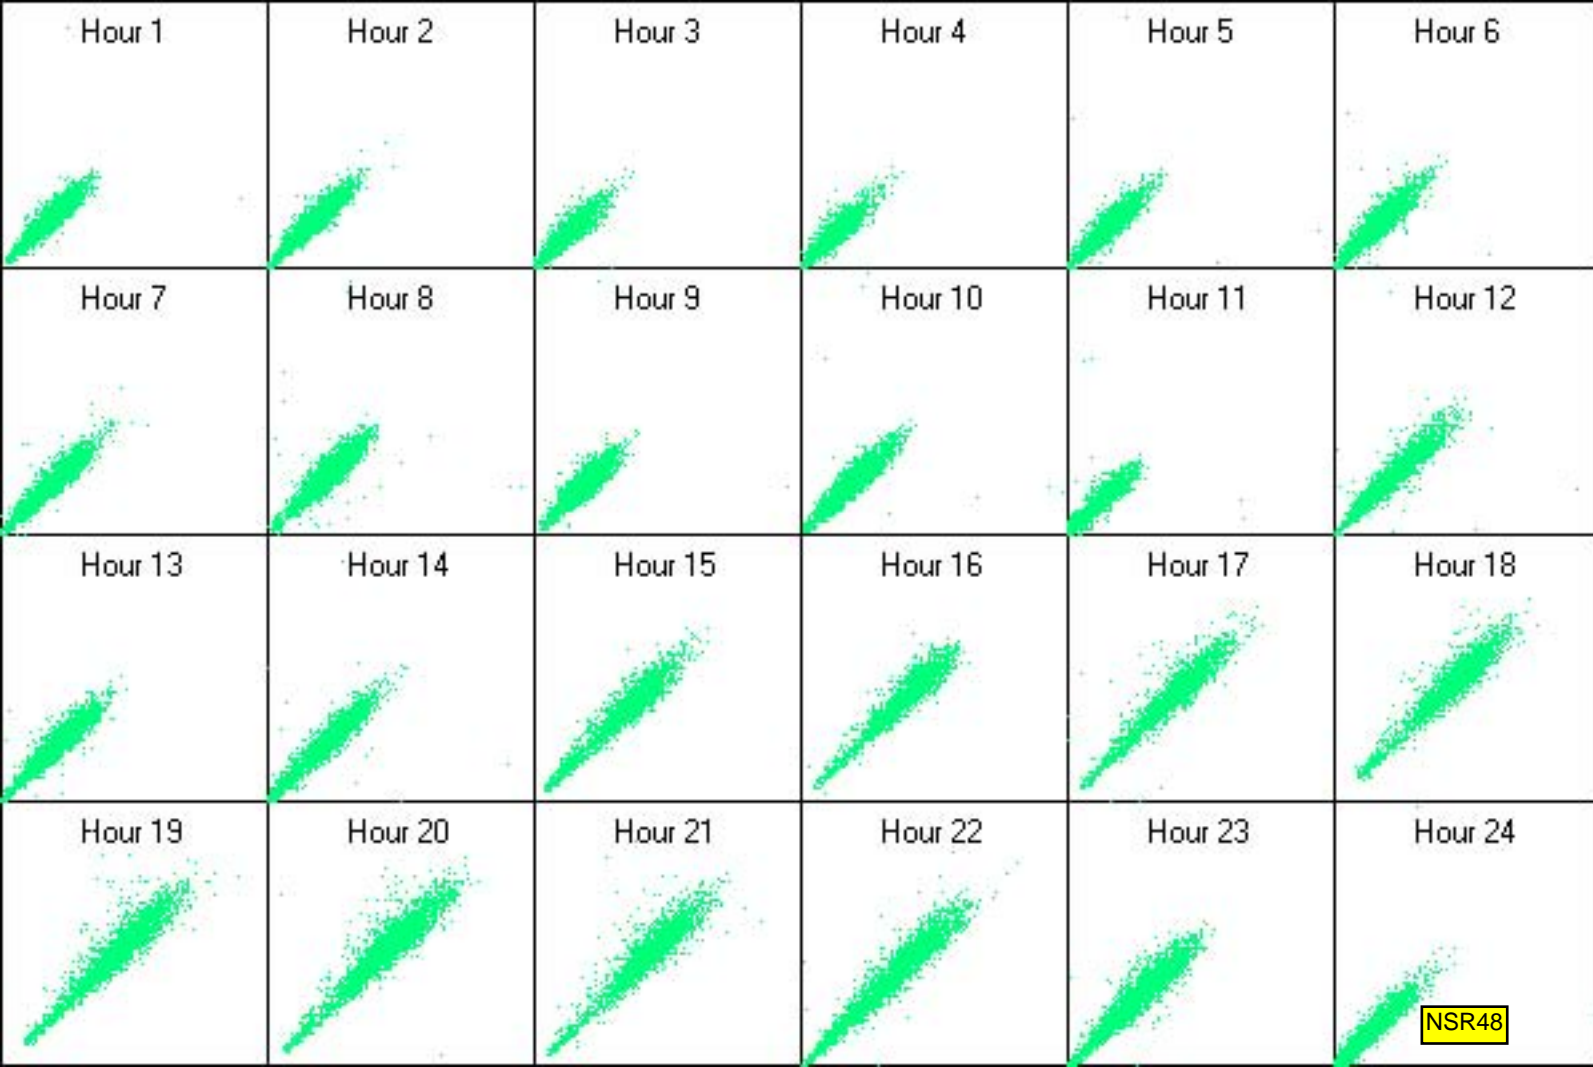

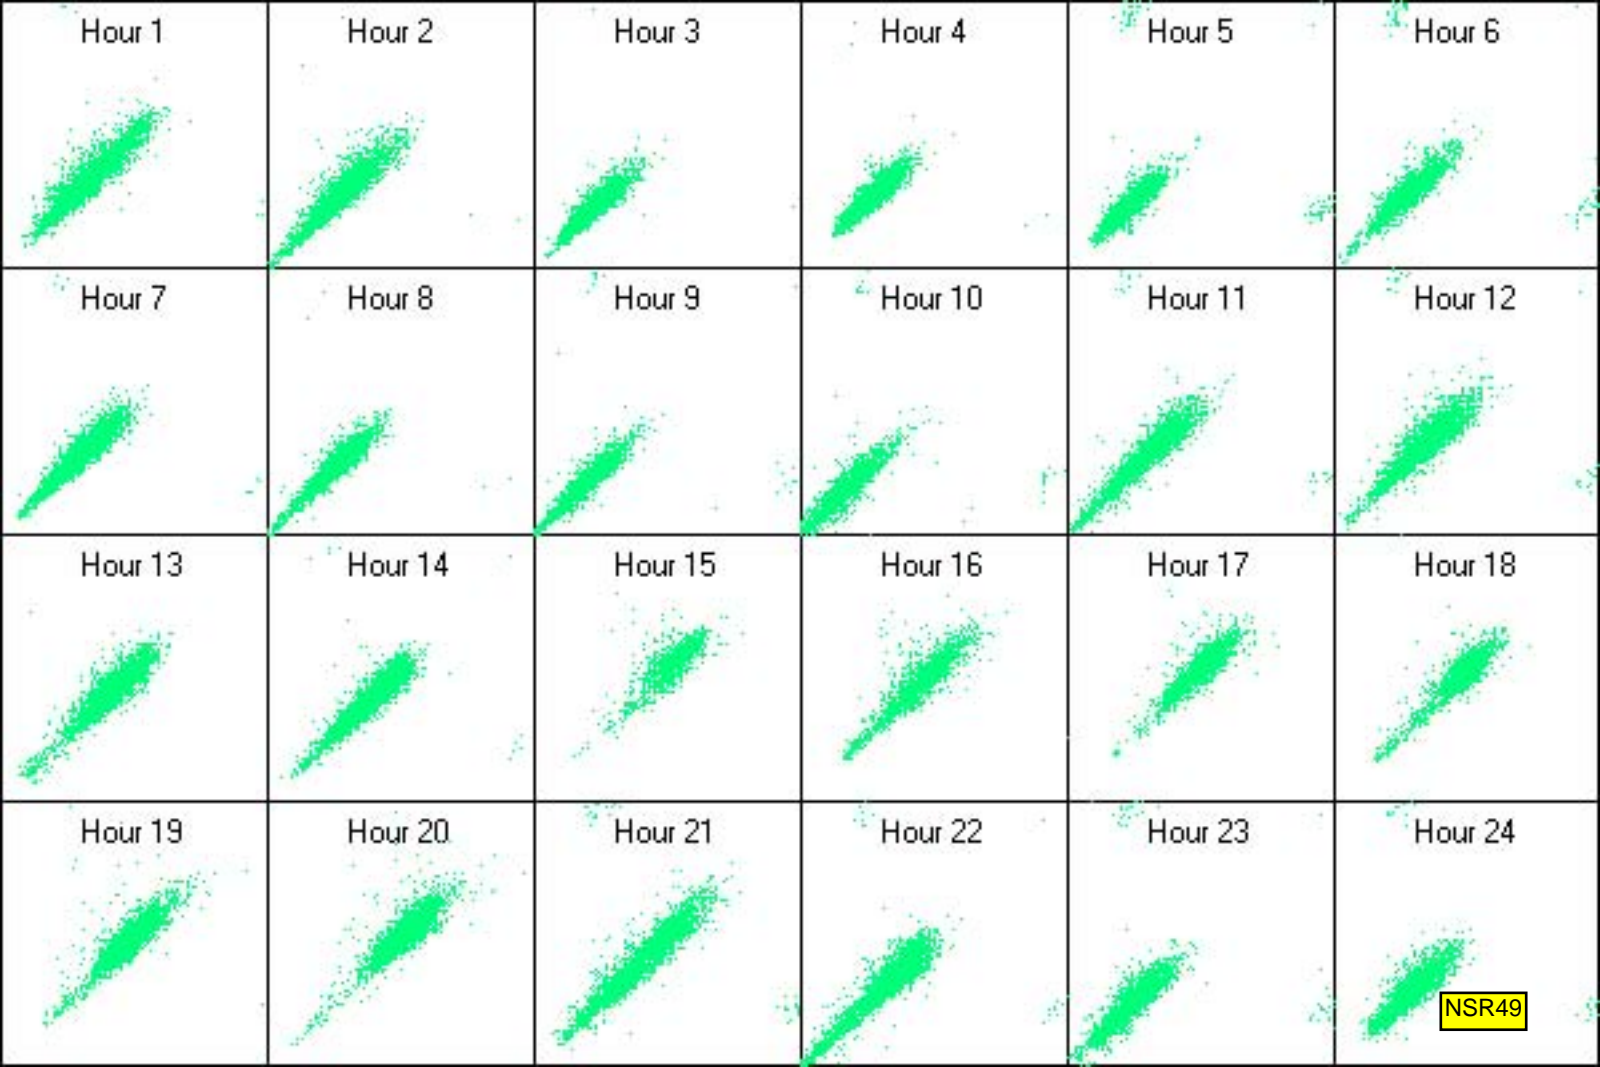

NSR49

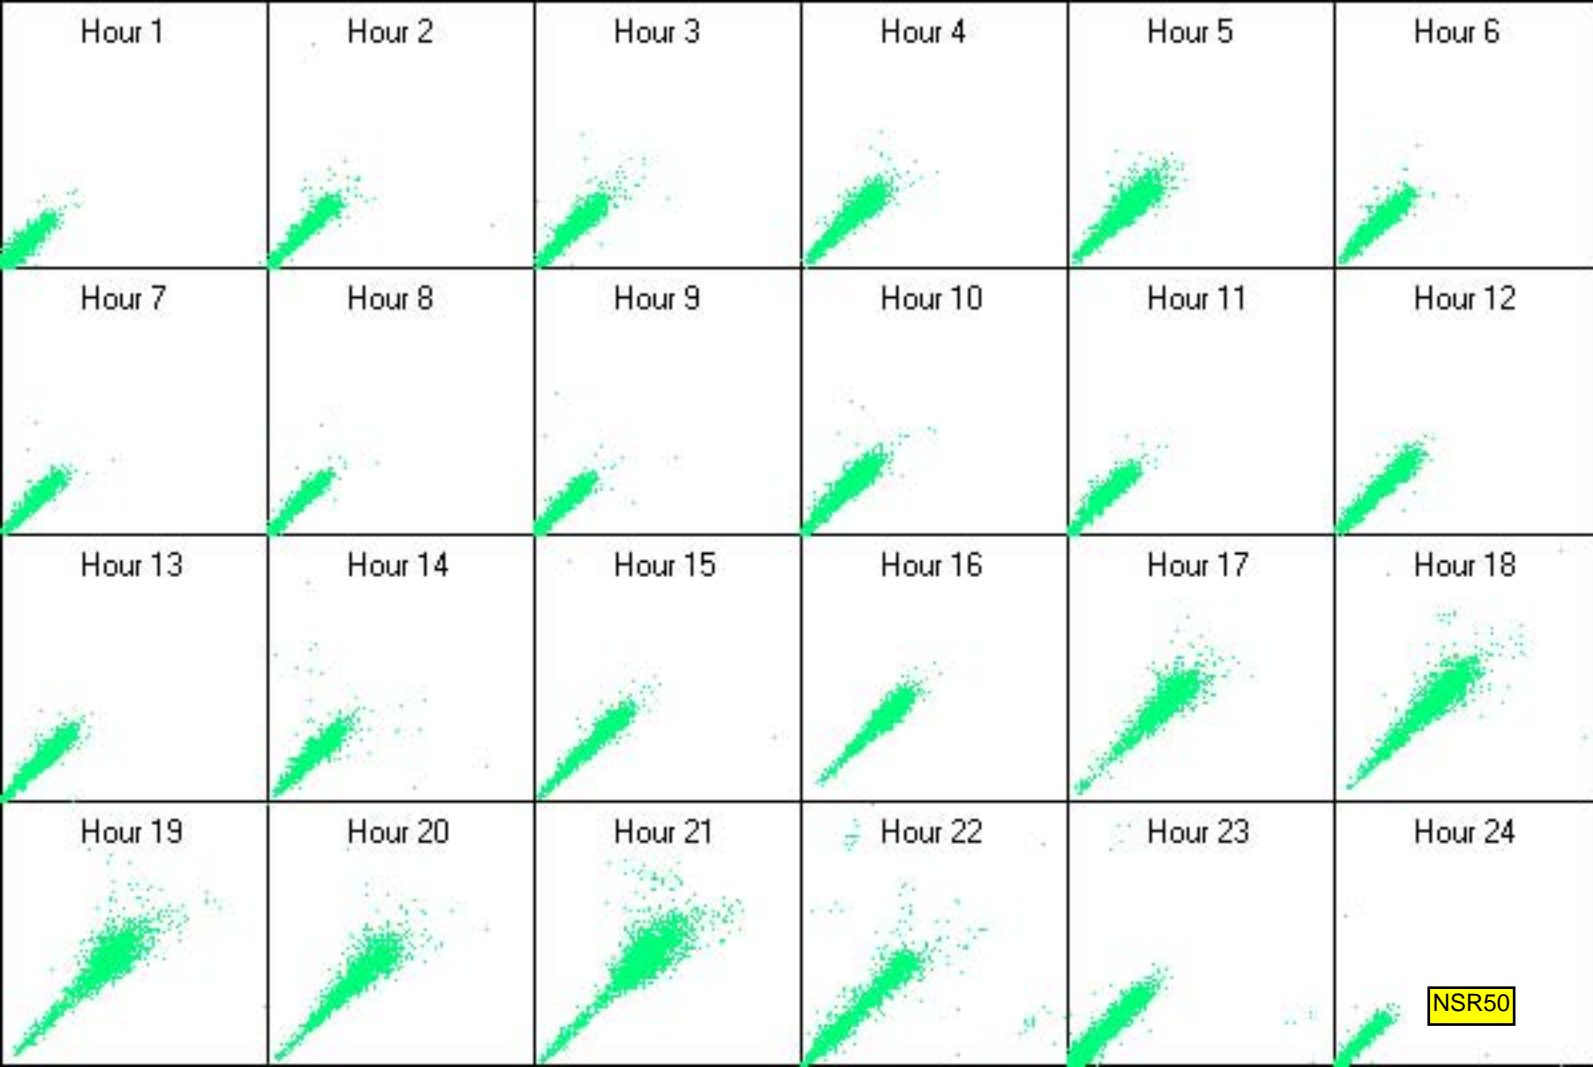

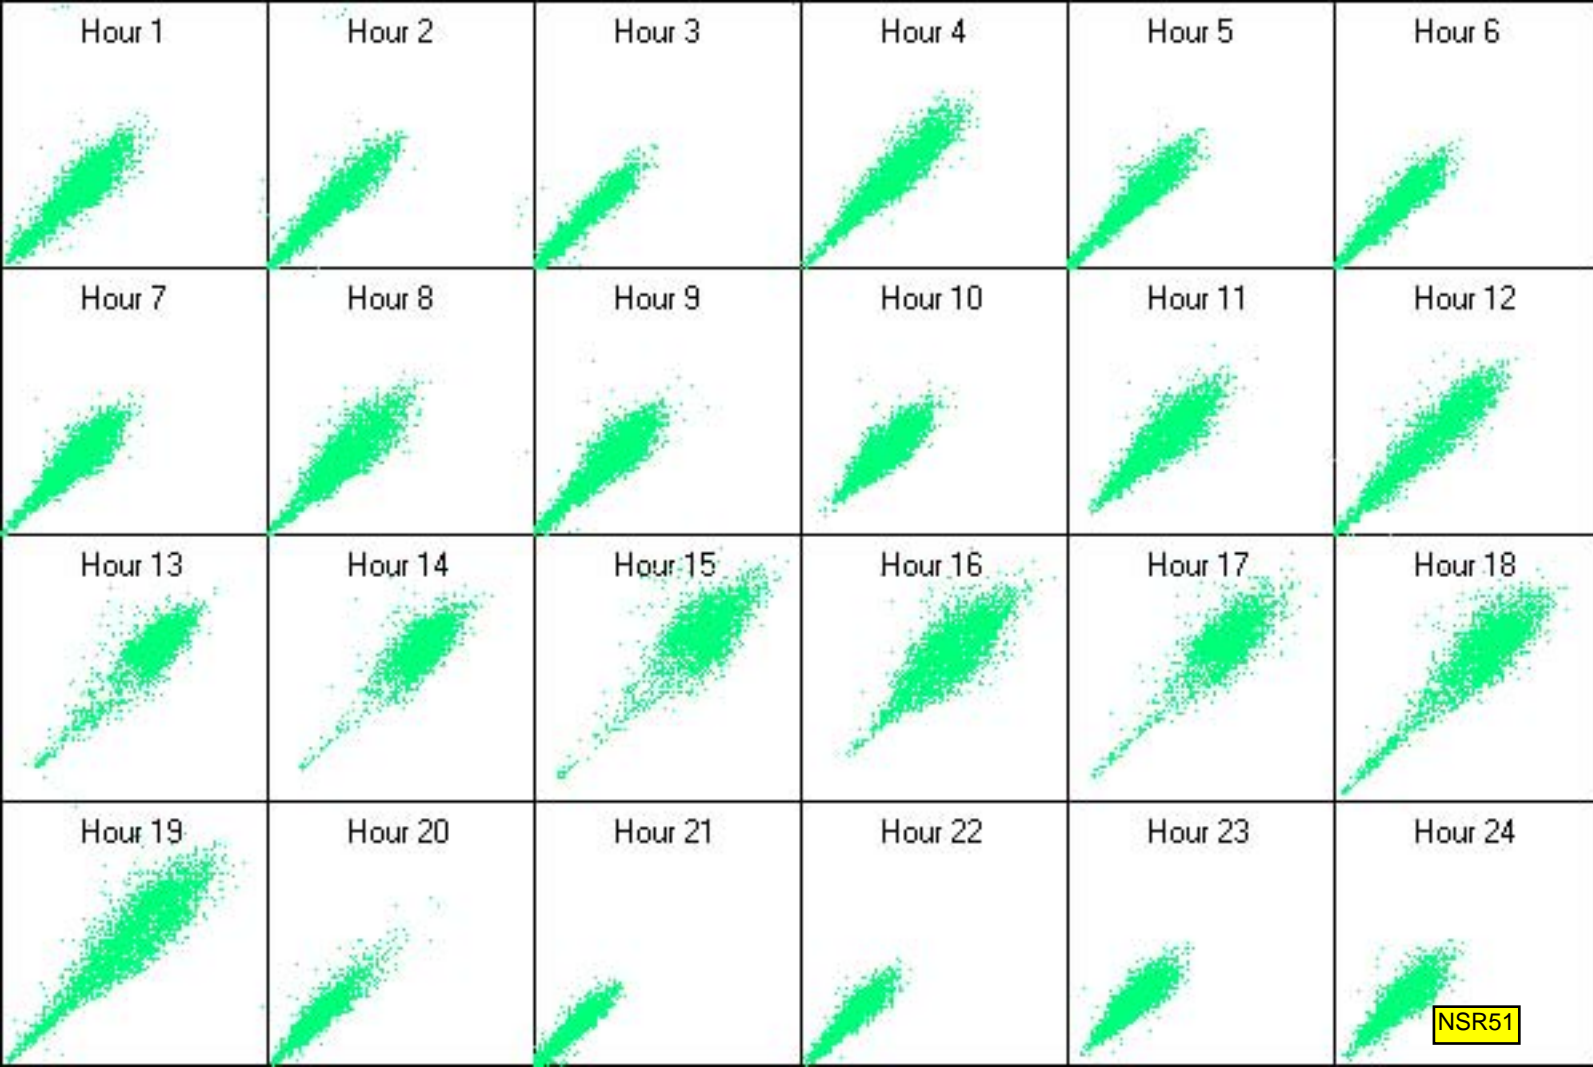

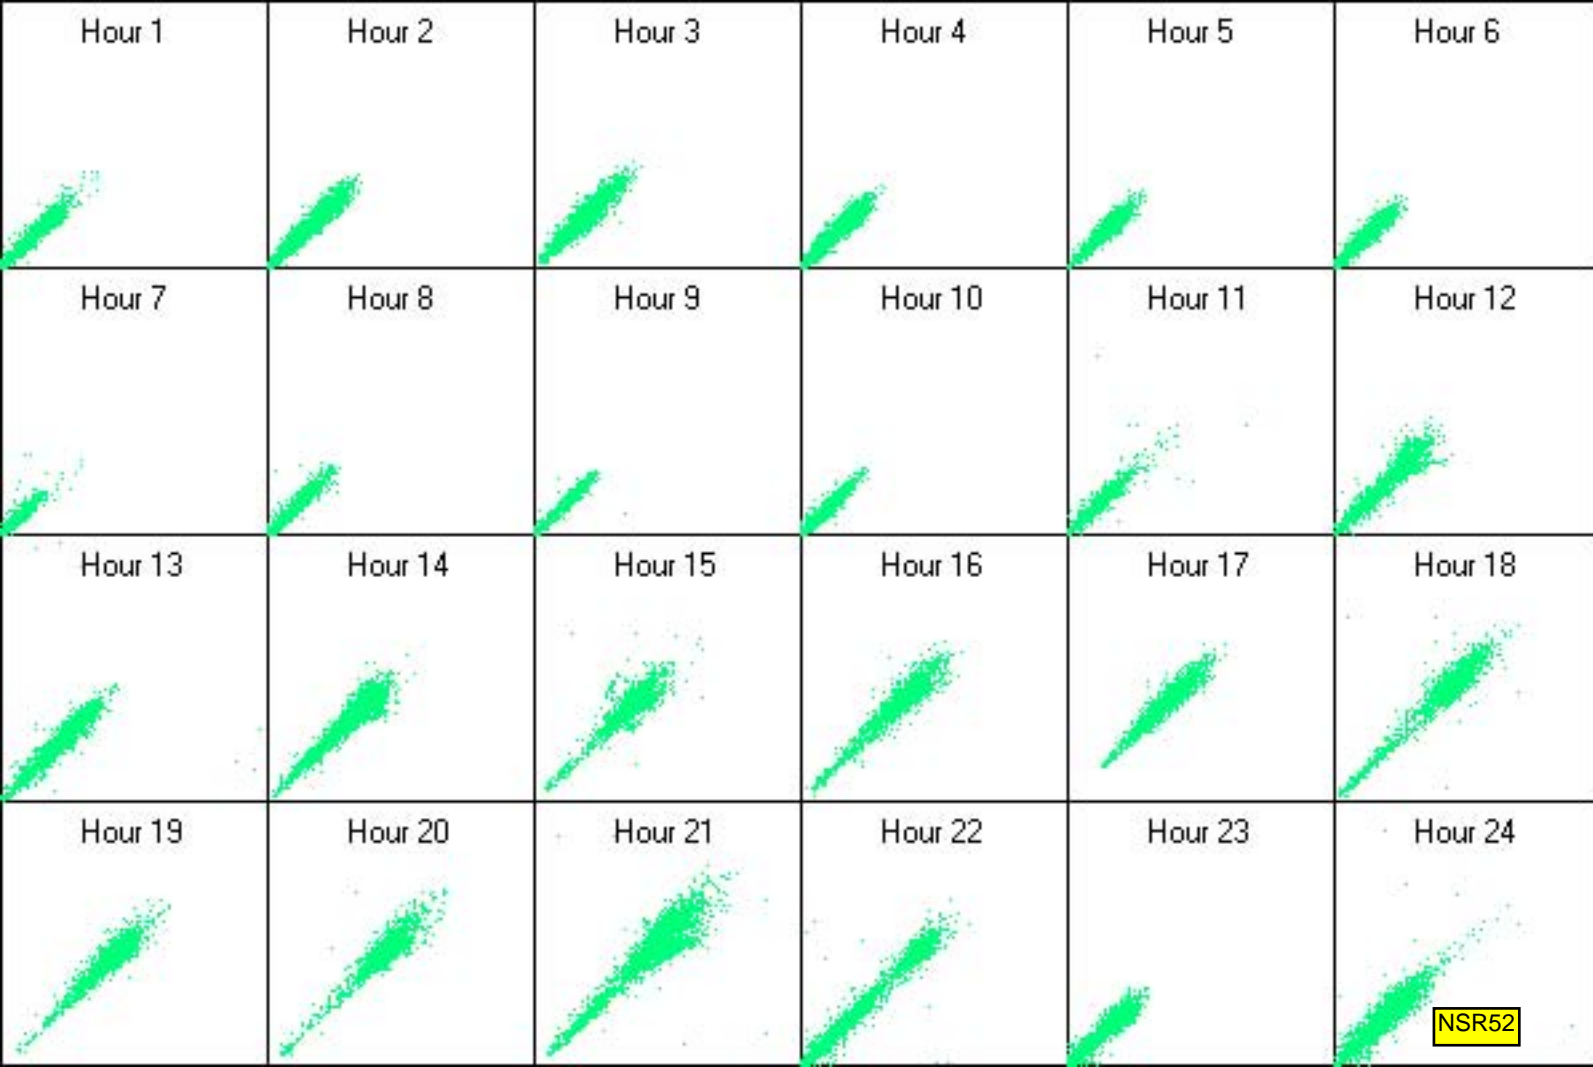

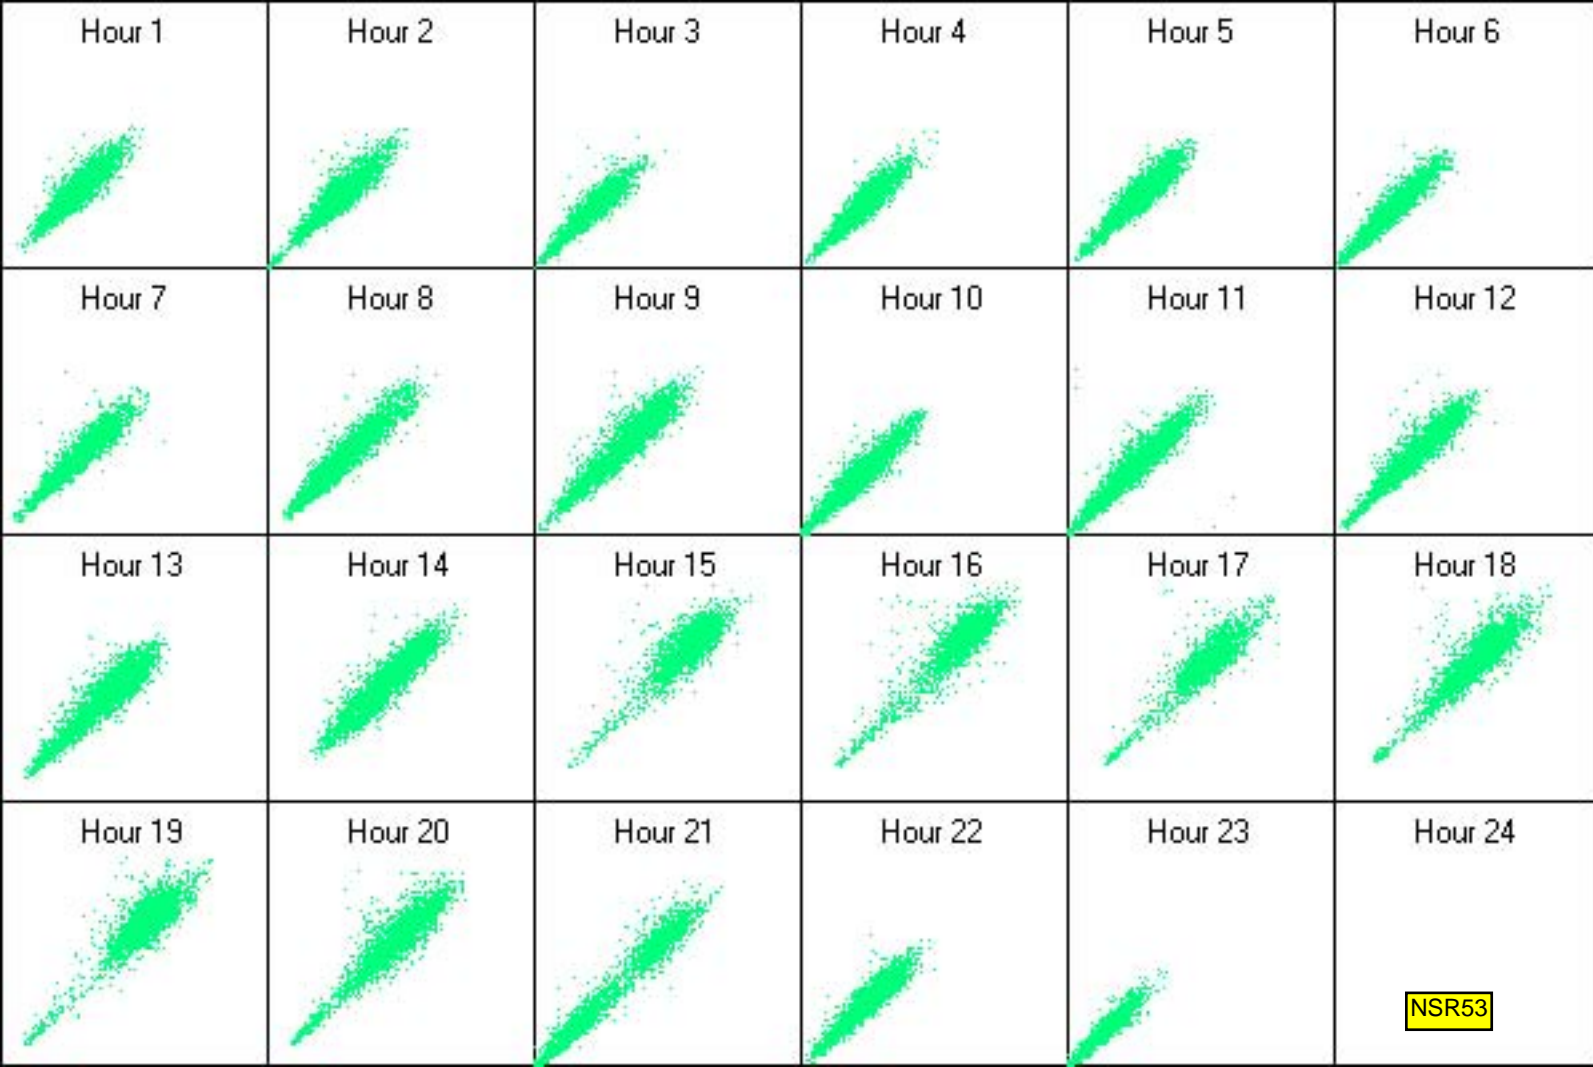

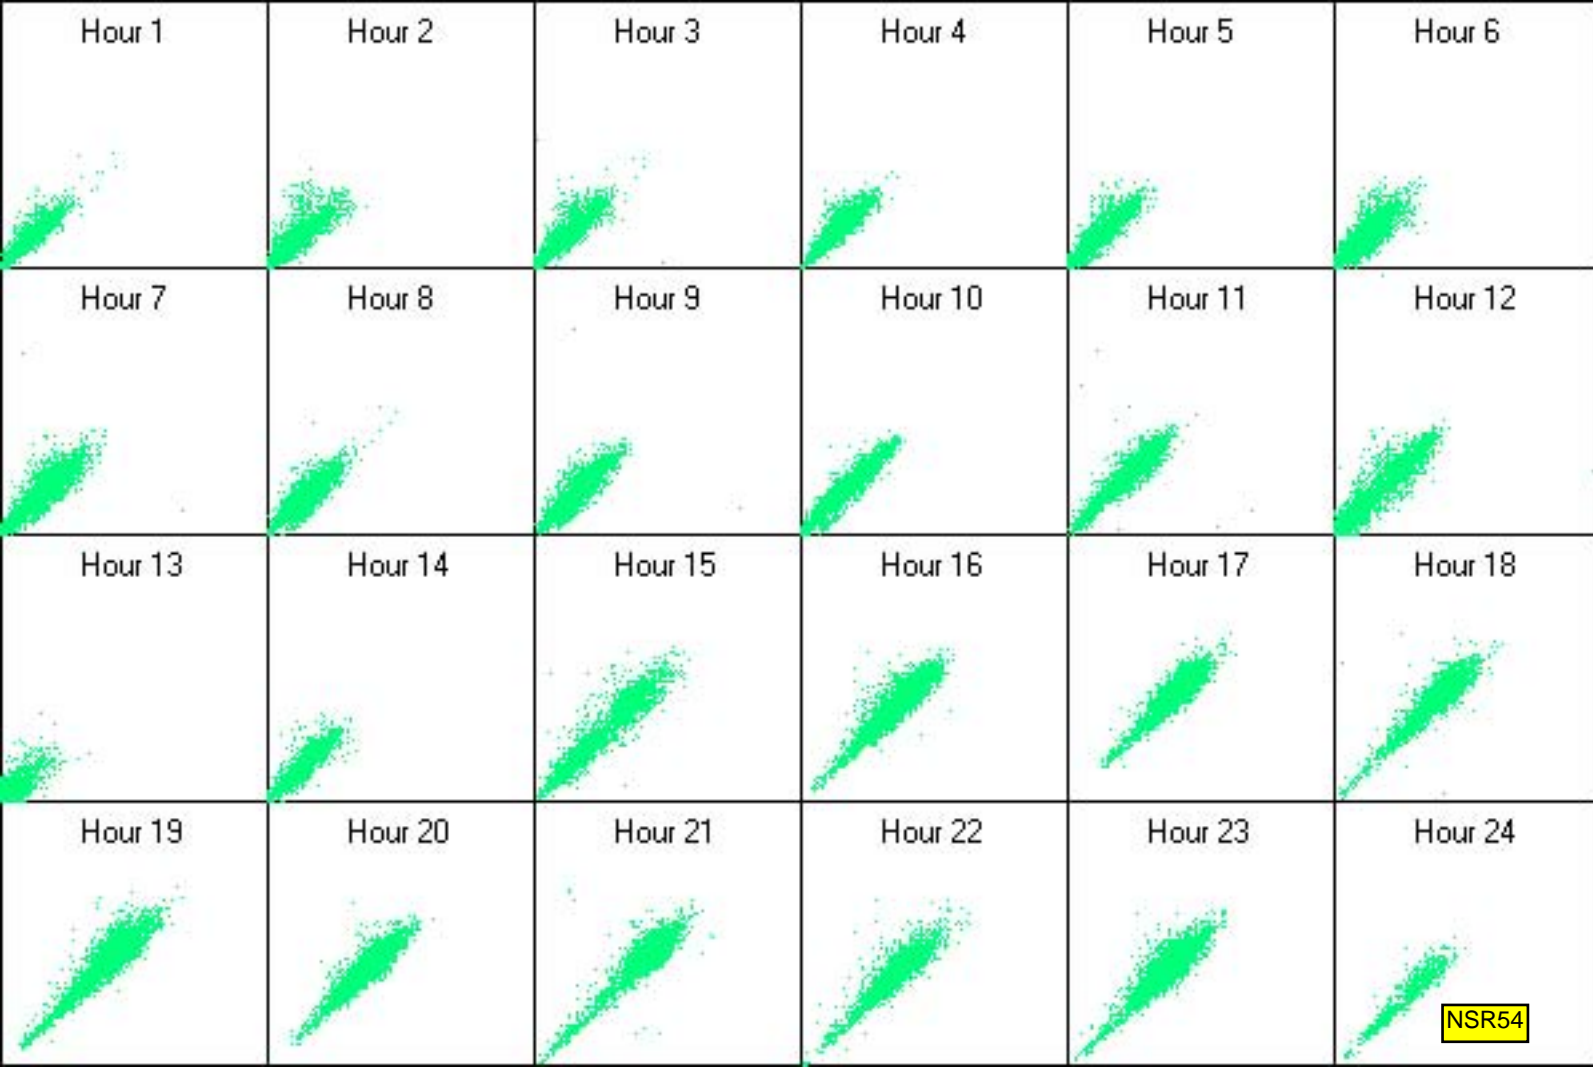

Supplement: MOESM3 [file 9431054]
